# Supplementary material for: A BrLINE1-RUP insertion in BrCER2 alters cuticular wax biosynthesis in Chinese cabbage (Brassica rapa L. ssp. pekinensis)
Source: Front Plant Sci. 2023 Jul 12;14:1212528. doi: 10.3389/fpls.2023.1212528 (PMC10368883; doi:10.3389/fpls.2023.1212528)
Supplement: Supplementary file 1 [file DataSheet_1.xls]

## Sheet: Table S1
Summary on linked regions(ΔSNP-index)
Chromosome	Start	End	Size(Mb)	Gene_Number
A01	18500000	18520000	0.02	0
A01	18750000	18750000	0	0
A01	19120000	19170000	0.05	4
A01	19480000	19590000	0.11	11
A01	19660000	19690000	0.03	3
A01	6190000	6190000	0	0
A01	6210000	8900000	2.69	484
Total	-	-	-	502
Summary on linked regions(ΔInDel-index)
Chromosome	Start	End	Size(Mb)	Gene_Number
A01	18740000	19040000	0.3	40
A01	19060000	19210000	0.15	13
A01	6170000	8680000	2.51	453
Total	-	-	-	506
Intersection of linked regions(ΔSNP-index) and linked regions(ΔInDel-index) was taken as final candidate linked regions
Chromosome_ID	Start	End	Size(Mb)	Gene_Number
A01	18750000	18750000	0	0
A01	19120000	19170000	0.05	4
A01	6190000	6190000	0	0
A01	6210000	8680000	2.47	443
Total	-	-	-	447

## Sheet: Table S2
Table S2 Primer sequences used for fine mapping in this study.
Primer set name	Chr	Physical position	the products (bps) in glossy plants	the products (bps) in waxy plants	Primer discription	Primer sequence(5'-3')
M70	A01	7029289	316	232, 232/316	Forward	ACTTCCCACCTTCATTACG
					Reverse	GAGCCTGGTGATGAGAAAT
M73	A01	7359849	299	208, 208/299	Forward	GAATGTGACACTTTACACTTTGG
					Reverse	AATCAACCATCTGAAGGCAC
M79	A01	7920154	495	370, 370/495	Forward	TTCAAAAGCATTAGCCTCA
					Reverse	GAACCCACTACTTCTCATTACA
M80	A01	8006264	0	228	Forward	TCCCTATTGCTTGAGCGTTA
					Reverse	TGCTAGACAAAAGGCGGC
M81	A01	8107040	198	108, 108/198	Forward	GATTCTCAACAACAACGACCCT
					Reverse	TCCTGGACCGTGAACCCT
M81.3	A01	8136374	0	333	Forward	TGACCCATCCTCTTAAAAG
					Reverse	TAGATCATATCCGAGCCAC
M81.7	A01	8172274	203	263, 203/263	Forward	ATAGAAACAAATCACATCCTTG
					Reverse	GGTTGAATCTCCTCGCAT
M87	A01	8693813	148	200, 148/200	Forward	CCTTAGACTCTCCCATTTTC
					Reverse	AAGATTTGGTGGCATGTT
M94	A01	9464073	213	124, 124/213	Forward	CACCCATTATCTTACCAACC
					Reverse	TGACACGCTGCAAACTTAC
M104	A01	10366054	267	186, 186/227	Forward	TTTTTGTCTCTGACCCGAA
					Reverse	CTGTGCTCGCTTGGTATG
M124	A01	12389899	165	227, 165/227	Forward	CGTAGATTTGTTGGCTTTAGT
					Reverse	TGGATGAGATGTTATCCGAT
M176	A01	17591501	252	171, 171/252	Forward	GCTAAAAGAAAGAATCTGGAGT
					Reverse	CCGTGGATGGATGGTCT
Primer sequences used for qRT-PCR in this study.
Primer set name	Primer discription	Primer sequence (5'-3')
BrACT7	Forward	TTCAATGTCCCTGCCATGTA
	Reverse	GAGACGGAGGATAGCGTGAG
BrCER2	Forward	GCAAGCCCAGTGACAGAT
	Reverse	GTCGAGCAAAGGAAACGT
Primer sequence used for detecting transposons in this study.
Primer set name	Primer discription	Primer sequence (5'-3')
BrLINE1-RUP	Forward	AGTCCCATCTTGGTCCTTCG
	Reverse	ATGTGCCAGCATCCGAGG
Brcer2-LINE1	Forward	ATACTGAATATCCGTGGGG
	Reverse	TACCTCGGTCATCTCGTCT
Primer sequences used for expression validation of RNA-Seq data by qRT-PCR
Primer set name	Primer sequence (5'-3')
BraA01g010840F	CGGCAGATAAATGTCCAAG
BraA01g010840R	TCCTTCACCCTCCACCTC
BraA01g011910F	TATGGCACTTGCTGCTGA
BraA01g011910R	AATCTGTAATCCGAGGAACTG
BraA03g012750F	CTATGACTACGACGCTCCTC
BraA03g012750R	AAACGCAGCACAAGATGA
BraA10g010550F	TTTCCTGGTTTGGCTTTG
BraA10g010550R	GATTTATCATTCTGGGTGGG
BraA07g012290F	TCATCTCTCAGTTGGAATCG
BraA07g012290R	TCACCTCCTTGATGTCTTTG
BraA07g015310F	ATGTTATCTGGTTTTGCCG
BraA07g015310R	AGAATCACTCCAACCCTCAC
BraA01g018010F	GATTGCTGCTTAGCCTTAGAA
BraA01g018010R	CCCCACTGCTTGTGACCA
BraA08g004520F	GCAAGAAATCAGGAGGAGC
BraA08g004520R	AACCCAACACCTACACAAAC

## Sheet: Table S3
Table S3 Genetic analysis of the glosssy trait in F1 and F2 populations from crosses between the HN-19G and QM19 lines
Cross combination	Generation	Total	Waxy plants	Glossy plants	Mendelian expectation	χ2	χ2[df=1, P=0.05]
HN19-G×QM19	F1	20	20
	F2	896	675	221	3:1	0.054	3.841

## Sheet: Table S4
Statistics on BSA-seq data
sample ID	Clean_Reads	Clean_Base	Q20(%)	Q30(%)	GC(%)
G-bulk	65229700	19385754958	98.93	94.16	37.24
W-bulk	82759172	24575211594	98.97	94.35	37.56
HN19-G	28264650	8392507736	98.41	91.88	37.19
QM19	26606414	7903950536	98.43	91.98	37.14
Statistics on sequencing depth and genome coverage on B. rapa genome v3.0
sample ID	Ave_depth	Cov_ratio_1X(%)	Cov_ratio_5X(%)	Cov_ratio_10X(%)
G-bulk	53	97.23	95.06	92.95
W-bulk	67	97.17	95.45	93.85
HN19-G	23	93.77	89.34	79.61
QM19	21	93.36	85.28	64.62

## Sheet: Table S5
	Table S5 the results of BLAST analysis with the 130-bp insertion fragment in Brassica rapa v3.0 genome
	Genomic Location	E-value	Score	Alignment length	Identity (%)
0	A08(+):19840059-19840188	3.99e-61	260	130	100
0	A08(-):13929537-13929418	1.07e-17	101	121	78.512
0	A08(+):12259831-12259958	2.36e-13	84	133	76.692
0	A08(+):3113906-3114023	1.49e-09	71	122	75.41
0	A08(-):1009262-1009237	0.017	45	27	96.296
0	A08(-):10763723-10763692	0.017	44	32	87.5
0	A08(+):767745-767783	0.059	43	39	82.051
0	A08(-):15370858-15370834	0.059	43	26	96.154
0	A08(+):22603565-22603589	0.059	43	26	96.154
0	A08(+):21353323-21353348	0.059	42	26	92.308
0	A03(+):36354593-36354722	8.78e-57	245	130	97.692
0	A03(-):20002179-20002052	3.28e-43	195	132	90.152
0	A03(-):5082089-5081971	2.88e-12	81	129	75.969
0	A03(-):538354-538328	0.001	49	27	96.296
0	A03(-):3146793-3146743	0.001	49	54	81.481
0	A03(-):9076420-9076299	0.001	49	127	70.079
0	A03(-):5474631-5474584	0.005	46	53	79.245
0	A03(+):11012237-11012263	0.017	44	27	92.593
0	A03(+):23841796-23841822	0.017	44	27	92.593
0	A03(+):24226155-24226181	0.017	44	27	92.593
0	A03(-):27788630-27788604	0.017	44	27	92.593
0	A03(+):4172516-4172549	0.059	43	39	84.615
0	A03(-):29106547-29106509	0.059	43	39	82.051
0	A03(+):609995-610020	0.059	42	26	92.308
0	A03(-):10188396-10188352	0.059	42	49	79.592
0	A03(-):28170367-28170342	0.059	42	26	92.308
0	A01(-):27153745-27153614	7.7e-45	201	132	91.667
0	A01(-):22202692-22202588	3.5e-11	77	107	76.636
0	A01(-):7583687-7583608	2.21e-07	63	81	76.543
0	A01(+):26095155-26095270	9.4e-06	56	118	72.034
0	A01(+):6920922-6920948	3.28e-05	54	27	100
0	A01(-):25649443-25649396	0.0004	51	53	79.245
0	A01(+):1062540-1062566	0.001	49	27	96.296
0	A01(-):12911118-12910997	0.001	49	127	70.079
0	A01(+):7660528-7660555	0.005	46	28	92.857
0	A01(+):5156531-5156555	0.017	45	25	96
0	A01(+):7726720-7726757	0.017	44	39	84.615
0	A01(-):7825599-7825575	0.059	43	26	96.154
0	A01(+):18937274-18937307	0.059	42	37	83.784
0	A10(-):15354139-15354013	1.39e-41	188	130	90
0	A10(-):1917079-1916958	3.07e-18	103	128	78.906
0	A10(+):302428-302552	1.59e-15	92	128	77.344
0	A10(+):9019140-9019267	1e-11	79	133	75.94
0	A10(-):13006683-13006562	2.21e-07	62	123	72.358
0	A10(-):14848918-14848848	7.72e-07	60	71	78.873
0	A10(-):12013654-12013535	3.28e-05	55	124	71.774
0	A10(-):15709413-15709376	3.28e-05	54	39	89.744
0	A10(+):15432498-15432549	0.0004	50	55	80
0	A10(-):1492993-1492967	0.001	49	27	96.296
0	A10(-):19513201-19513154	0.005	46	53	79.245
0	A10(+):10064291-10064328	0.017	44	39	84.615
0	A10(+):14573735-14573761	0.017	44	27	92.593
0	A10(+):14788867-14788893	0.017	44	27	92.593
0	A10(+):4082219-4082257	0.059	42	40	85
0	A10(-):15753705-15753679	0.059	42	28	92.857
0	A09(-):37263025-37262941	3.5e-30	147	87	95.402
0	A09(-):2738454-2738323	2.21e-26	133	135	80.741
0	A09(-):40184979-40184854	7.71e-26	130	127	81.102
0	A09(+):10165457-10165577	3.74e-17	99	123	78.049
0	A09(-):37270193-37270141	4.56e-16	94	54	96.296
0	A09(+):36741697-36741820	2.36e-13	84	127	75.591
0	A09(-):39882854-39882736	8.24e-13	83	127	77.953
0	A09(-):7682896-7682770	1.82e-08	66	132	72.727
0	A09(+):17422380-17422503	2.69e-06	58	132	71.212
0	A09(+):4733098-4733134	0.000115	53	38	92.105
0	A09(+):33237858-33237896	0.000115	53	39	87.179
0	A09(+):35114679-35114795	0.0004	50	131	70.992
0	A09(-):3212490-3212373	0.001	49	119	68.908
0	A09(-):33301625-33301592	0.001	48	34	88.235
0	A09(+):33156209-33156255	0.005	47	53	79.245
0	A09(-):30651876-30651829	0.005	46	53	79.245
0	A09(-):32402756-32402717	0.005	46	40	85
0	A09(+):39481801-39481828	0.005	46	28	92.857
0	A09(-):43099700-43099653	0.005	46	53	79.245
0	A09(+):12567866-12567890	0.017	45	25	96
0	A09(+):5306096-5306122	0.017	44	27	92.593
0	A09(+):9927773-9927799	0.017	44	27	92.593
0	A09(-):15403274-15403248	0.017	44	27	92.593
0	A09(+):16192134-16192160	0.017	44	27	92.593
0	A09(-):38216799-38216762	0.017	44	39	84.615
0	A09(+):41361999-41362025	0.017	44	27	92.593
0	A09(+):9558875-9558919	0.059	43	45	80
0	A09(-):10253714-10253679	0.059	43	38	84.211
0	A09(-):13530565-13530532	0.059	43	39	84.615
0	A09(-):15764206-15764182	0.059	43	26	96.154
0	A09(+):34869692-34869729	0.059	43	42	83.333
0	A09(+):850695-850720	0.059	42	26	92.308
0	A09(+):1734574-1734601	0.059	42	28	92.857
0	A09(+):33835212-33835237	0.059	42	26	92.308
0	A07(-):8593696-8593572	9.39e-25	127	129	80.62
0	A07(+):24507423-24507544	3.07e-18	103	128	78.906
0	A07(-):23346095-23345973	3.5e-11	77	129	74.419
0	A07(+):450779-450881	4.27e-10	73	111	77.477
0	A07(+):4052073-4052188	4.27e-10	73	124	75
0	A07(-):1882295-1882172	6.34e-08	64	127	72.441
0	A07(+):1378962-1379092	7.72e-07	60	134	71.642
0	A07(-):10577491-10577439	9.4e-06	56	56	82.143
0	A07(-):11870884-11870847	0.001	49	39	87.179
0	A07(-):9886533-9886501	0.005	47	33	90.909
0	A07(-):26274896-26274860	0.005	47	38	86.842
0	A07(+):14229748-14229795	0.005	46	53	77.358
0	A07(+):22711311-22711348	0.005	46	38	84.211
0	A07(+):1326721-1326755	0.017	45	38	86.842
0	A07(+):21083221-21083246	0.017	45	27	96.296
0	A07(+):15770181-15770207	0.017	44	27	92.593
0	A07(-):28528002-28527968	0.059	42	39	84.615
0	A02(+):525532-525658	5.93e-21	112	129	79.845
0	A02(-):10353802-10353681	3.07e-18	103	125	76.8
0	A02(-):989429-989311	8.24e-13	83	127	77.953
0	A02(-):24315519-24315395	3.5e-11	77	128	75
0	A02(+):8640184-8640302	4.27e-10	73	127	76.378
0	A02(-):11841646-11841610	2.69e-06	59	37	91.892
0	A02(-):31171441-31171317	2.69e-06	59	129	72.868
0	A02(+):8040680-8040795	2.69e-06	58	124	70.968
0	A02(+):28186009-28186124	9.4e-06	56	118	72.034
0	A02(+):27739512-27739592	0.000115	52	82	74.39
0	A02(-):1104933-1104897	0.0004	50	39	87.179
0	A02(-):11284612-11284576	0.0004	50	39	87.179
0	A02(+):19416527-19416642	0.0004	50	127	70.079
0	A02(+):8258170-8258273	0.001	48	117	70.94
0	A02(+):1551210-1551244	0.005	47	39	87.179
0	A02(-):17735882-17735776	0.005	47	109	70.642
0	A02(+):7731289-7731326	0.017	44	39	84.615
0	A02(+):7895789-7895815	0.017	44	27	92.593
0	A02(-):9586429-9586392	0.017	44	39	84.615
0	A02(+):28048287-28048313	0.017	44	27	92.593
0	A02(+):30262942-30262968	0.017	44	27	92.593
0	A02(-):83559-83535	0.059	43	26	96.154
0	A02(+):22740704-22740742	0.059	43	39	82.051
0	A02(-):1746592-1746567	0.059	42	26	92.308
0	A02(-):2797847-2797813	0.059	42	39	82.051
0	A06(+):24801679-24801800	3.07e-18	103	128	78.906
0	A06(+):5433665-5433788	2.36e-13	84	127	75.591
0	A06(-):24962473-24962436	3.28e-05	54	39	89.744
0	A06(+):20308051-20308086	0.0004	51	39	87.179
0	A06(-):11266407-11266353	0.0004	50	58	81.034
0	A06(+):22467399-22467434	0.0004	50	40	87.5
0	A06(-):192220-192194	0.001	49	27	96.296
0	A06(-):3440286-3440260	0.001	49	27	96.296
0	A06(-):25686566-25686540	0.001	49	27	96.296
0	A06(+):26372013-26372039	0.001	49	27	96.296
0	A06(-):2550459-2550353	0.005	47	123	69.106
0	A06(+):4881244-4881269	0.005	47	26	96.154
0	A06(-):8790118-8790071	0.005	46	53	79.245
0	A06(+):3108152-3108188	0.017	45	39	87.179
0	A06(+):4180499-4180547	0.017	45	53	77.358
0	A06(+):19969804-19969840	0.017	45	39	87.179
0	A06(-):23391360-23391334	0.017	44	27	92.593
0	A06(+):25799120-25799161	0.017	44	42	80.952
0	A06(-):7066479-7066444	0.059	43	38	84.211
0	A06(+):7547689-7547713	0.059	43	26	96.154
0	A05(+):11686286-11686407	3.07e-18	103	128	78.906
0	A05(+):6384152-6384279	8.24e-13	83	134	76.119
0	A05(-):27201256-27201138	8.24e-13	83	127	77.953
0	A05(+):10366817-10366866	2.69e-06	58	51	84.314
0	A05(+):25536539-25536576	0.000115	52	40	90
0	A05(+):1346125-1346182	0.0004	50	59	79.661
0	A05(-):15246354-15246316	0.001	48	39	84.615
0	A05(+):27572165-27572199	0.005	47	39	87.179
0	A05(+):1130762-1130789	0.005	46	28	92.857
0	A05(-):6196374-6196338	0.017	45	39	87.179
0	A05(+):23899511-23899554	0.017	45	44	81.818
0	A05(+):10028591-10028628	0.017	44	39	84.615
0	A05(+):10414041-10414072	0.017	44	32	87.5
0	A05(+):18261645-18261671	0.017	44	27	92.593
0	A05(+):4518464-4518508	0.059	43	51	78.431
0	A05(-):26569843-26569806	0.059	43	42	80.952
0	A05(+):20061879-20061913	0.059	42	35	88.571
0	A04(+):4500703-4500740	7.72e-07	61	38	92.105
0	A04(+):19806246-19806370	7.72e-07	61	129	72.868
0	A04(+):416850-416888	0.000115	53	39	87.179
0	A04(+):16023356-16023402	0.000115	52	53	81.132
0	A04(+):1996399-1996425	0.001	49	27	96.296
0	A04(-):8537112-8537086	0.001	49	27	96.296
0	A04(+):17545285-17545311	0.001	49	27	96.296
0	A04(-):18728153-18728127	0.001	49	27	96.296
0	A04(-):6087803-6087765	0.001	48	39	84.615
0	A04(+):16118607-16118717	0.005	46	127	70.079
0	A04(-):1952456-1952412	0.017	44	46	82.609
0	A04(-):9380795-9380758	0.017	44	39	84.615
0	A04(+):12573203-12573229	0.017	44	27	92.593
0	A04(+):1948476-1948515	0.059	43	41	82.927
0	A04(-):3843997-3843973	0.059	43	26	96.154
0	A04(-):9593738-9593713	0.059	42	26	92.308

## Sheet: Table S6
Table S6 the LINE1-RUP TE in 18 representative B. rapa genomes
Species	Genome version	Name	Description	LINE1-RUP	Chromosome	Position of LINE1-RUP
B. rapa	Z1	ssp. oleifera	sarson type	YES	A08	A08(+):22030472-22033727
	TBA	unknown	From Tibet, China	NO	NA	NA
	BRO	Broccolieto	Broccolieto	YES	A08	A08(+):20048801-20052057
	TUE	ssp. rapa	Turnip	YES	A08	A08(+):19841691-19844947
	TUA	ssp. rapa	Turnip	YES	A08	A08(+):20360016-20363272
	MIZ	ssp. nipposinica	Mizuna	YES	A08	A08(+):20199224-20202480
	TCA	ssp. chinensis var.tai-tsai	Taicai	YES	A08	A08(+):19976288-19979544
	CCB	ssp. pekinensis	Chinese cabbage	NO	NA	NA
	CCA	ssp. pekinensis	Chinese cabbage	YES	A08	A08(+):19286502-19289758
	Chiifu	ssp. pekinensis	Chinese cabbage	YES	A08	A08(+):19838382-19841638
	OIA	ssp. oleifera	Oil seeds	NO	NA	NA
	OIB	ssp. oleifera	Rapid cycling	NO	NA	NA
	OIC	ssp. oleifera	Rapid cycling	NO	NA	NA
	PCB	ssp. chinensis	Pak choi	NO	NA	NA
	PCA	ssp. chinensis	Pak choi	YES	A08	A08(+):18461857-18465113
	WTC	ssp. narinosa	Wutacai	NO	NA	NA
	CXB	ssp. parachinensis	Caixin	YES	A08	A08(+):19675091-19678347
	CXA	ssp. parachinensis	Caixin	NO	NA	NA

## Sheet: Table S7
Table S7. Cuticular wax composition in cauline leaves from waxy and glossy bulks.
Wax content [μg/dm2]
	W-bulk	G-bulk
Fatty acids
Palmitic Acid	2.18±0.40	2.26±0.43
Stearic acid	1.05±0.17	1.03±0.44
Hexacosanoic Acid	5.07±0.80	25.82±7.15**
Alkanes
Hexacosane	0.18±0.04	0.43±0.42
Heptacosane	5.85±1.45	10.77±2.37*
Nonacosane	328.19±63.66	15.42±2.73**
Triacontane	4.56±0.59	0.94±0.11**
Primary alcohols
1-Hexacosanol	18.35±1.33	47.65±13.76*
1-Heptacosanol	19.79±2.97	12.97±5.03
Octacosanol	31.22±3.47	51.77±11.04*
1-Triacontanol	5.39±3.68	3.54±0.97
Aldehydes
Octacosanal	29.09±1.89	44.59±12.34
Triacontanal	129.19±19.36	4.54±1.01**
Ketone
15-Nonacosanone	212.13±40.20	10.11±2.03**
Total content of cuticular waxes	792.23±120.84	231.85±57.14**
**P<0.01 (Student’s t test); *0.01<P<0.05 (Student’s t test)

## Sheet: Table S8
Statistics of RNA-seq data
Samples	Clean reads	Clean bases	GC Content	%≥Q30
G1	20996821	6284157950	0.4809	0.9479
G2	21348146	6390867124	0.4816	0.9492
G3	19370192	5795739916	0.4815	0.9495
W1	19148490	5732113288	0.482	0.9488
W2	20590674	6163817102	0.4834	0.9489
W3	20482645	6133169510	0.4825	0.9485
Statistics on reads’ mapping against B. rapa genome v3.0
Sample	Total Reads	Mapped Reads	Uniq Mapped Reads	Multiple Map Reads	Reads Map to '+'	Reads Map to '-'
G1	41993642	38,867,170 (92.55%)	37,821,373 (90.06%)	1,045,797 (2.49%)	20,106,212 (47.88%)	20,135,775 (47.95%)
G2	42696292	39,590,255 (92.73%)	38,534,456 (90.25%)	1,055,799 (2.47%)	20,469,414 (47.94%)	20,498,758 (48.01%)
G3	38740384	35,926,589 (92.74%)	34,939,653 (90.19%)	986,936 (2.55%)	18,596,130 (48.00%)	18,627,102 (48.08%)
W1	38296980	35,462,434 (92.60%)	34,524,970 (90.15%)	937,464 (2.45%)	18,331,979 (47.87%)	18,365,549 (47.96%)
W2	41181348	37,520,264 (91.11%)	36,112,675 (87.69%)	1,407,589 (3.42%)	19,864,514 (48.24%)	19,896,702 (48.31%)
W3	40965290	38,109,335 (93.03%)	37,060,664 (90.47%)	1,048,671 (2.56%)	19,729,898 (48.16%)	19,755,822 (48.23%)

## Sheet: Table S9
Table S9 Differentially expressed genes of cauline leaf from HN19-W (W1, W2 and W3) and HN19-G (G1, G2 and G3) by comparative transcriptome analysis
#ID	W1_Count	W2_Count	W3_Count	G1_Count	G2_Count	G3_Count	W1_FPKM	W2_FPKM	W3_FPKM	G1_FPKM	G2_FPKM	G3_FPKM	FDR	log2FC	regulated	COG_class	COG_class_annotation	GO_annotation	KEGG_annotation	KEGG_pathway_annotation	KOG_class	KOG_class_annotation	Pfam_annotation	Swiss-Prot_annotation	eggNOG_class	eggNOG_class_annotation	NR_annotation
BraA01g015290.3C.gene	3858	6302	7091	2254	2362	1819	91.3217	142.864	156.122	48.8524	50.1569	42.6133	5.30468e-14	-1.53398	down	--	--	Molecular Function: transferase activity, transferring acyl groups other than amino-acyl groups (GO:0016747);;	K13065|3.84e-13|smo:SELMODRAFT_450721|K13065 shikimate O-hydroxycinnamoyltransferase [EC:2.3.1.133] | (RefSeq) BAHDb5a-1; BAHD family acyltransferase	Phenylpropanoid biosynthesis (ko00940);; Flavonoid biosynthesis (ko00941);; Stilbenoid, diarylheptanoid and gingerol biosynthesis (ko00945)	--	--	Transferase family	Protein ECERIFERUM 2 OS=Arabidopsis thaliana OX=3702 GN=CER2 PE=1 SV=1	S	Function unknown	protein ECERIFERUM 2 [Brassica rapa]
BraA06g005720.3C.gene	1989	1431	910	556	861	786	72.3572	49.8517	30.7684	18.4974	28.0846	28.2656	0.00303728	-1.10711	down	[O]	Posttranslational modification, protein turnover, chaperones	Molecular Function: molecular_function (GO:0003674);; Molecular Function: catalytic activity (GO:0003824);; Cellular Component: cellular_component (GO:0005575);; Cellular Component: intracellular (GO:0005622);; Cellular Component: obsolete cell (GO:0005623);; Cellular Component: cytoplasm (GO:0005737);; Biological Process: biological_process (GO:0008150);; Biological Process: metabolic process (G…	--	--	[O]	Posttranslational modification, protein turnover, chaperones	Thioredoxin	Thioredoxin-like 1-1, chloroplastic OS=Arabidopsis thaliana OX=3702 GN=At1g08570 PE=2 SV=1	O	Posttranslational modification, protein turnover, chaperones	thioredoxin-like 1-1, chloroplastic [Brassica rapa]
BraA05g011680.3C.gene	28338	24685	12153	7674	8698	9606	644.66	537.799	257.119	159.824	177.521	216.229	0.00550844	-1.45625	down	[I]	Lipid transport and metabolism	Molecular Function: acetyl-CoA C-acyltransferase activity (GO:0003988);; Cellular Component: peroxisome (GO:0005777);; Biological Process: fatty acid beta-oxidation (GO:0006635);; Biological Process: phenylacetate catabolic process (GO:0010124);;	K07513|4.58e-305|brp:103867566|K07513 acetyl-CoA acyltransferase 1 [EC:2.3.1.16] | (RefSeq) 3-ketoacyl-CoA thiolase 2, peroxisomal	Fatty acid degradation (ko00071);; Valine, leucine and isoleucine degradation (ko00280);; alpha-Linolenic acid metabolism (ko00592);; Biosynthesis of unsaturated fatty acids (ko01040);; Fatty acid metabolism (ko01212);; Peroxisome (ko04146)	[I]	Lipid transport and metabolism	Thiolase, N-terminal domain	3-ketoacyl-CoA thiolase 2, peroxisomal OS=Arabidopsis thaliana OX=3702 GN=PED1 PE=1 SV=2	I	Lipid transport and metabolism	3-ketoacyl-CoA thiolase 2, peroxisomal [Brassica rapa]
BraA03g018960.3C.gene	696	441	290	150	139	183	51.7263	31.3862	20.0188	10.2085	9.25945	13.4347	2.32159e-05	-1.72433	down	--	--	Molecular Function: DNA binding (GO:0003677);; Molecular Function: zinc ion binding (GO:0008270);;	--	--	[R]	General function prediction only	AN1-like Zinc finger	Zinc finger A20 and AN1 domain-containing stress-associated protein 4 OS=Arabidopsis thaliana OX=3702 GN=SAP4 PE=1 SV=1	S	Function unknown	zinc finger A20 and AN1 domain-containing stress-associated protein 4 [Brassica rapa]
BraA03g043920.3C.gene	0	4	6	50	39	48	0	0.172756	0.252841	2.15194	1.65911	2.26916	9.38643e-05	3.68315	up	--	--	Biological Process: plant-type cell wall organization (GO:0009664);; Biological Process: plant-type cell wall biogenesis (GO:0009832);; Biological Process: cellulose microfibril organization (GO:0010215);; Cellular Component: anchored component of plasma membrane (GO:0046658);; Biological Process: plant-type cell wall cellulose biosynthetic process (GO:0052324);;	--	--	--	--	COBRA-like protein	COBRA-like protein 5 OS=Arabidopsis thaliana OX=3702 GN=COBL5 PE=2 SV=1	S	Function unknown	COBRA-like protein 5 [Brassica rapa]
BraA05g026750.3C.gene	14	9	33	163	126	200	0.670394	0.402121	1.56654	7.67082	5.80767	10.2002	8.61645e-09	3.04105	up	--	--	Cellular Component: plant-type vacuole (GO:0000325);; Biological Process: response to acid chemical (GO:0001101);; Biological Process: regulation of cell growth (GO:0001558);; Molecular Function: molecular_function (GO:0003674);; Molecular Function: structural molecule activity (GO:0005198);; Molecular Function: structural constituent of cell wall (GO:0005199);; Cellular Component: cellular_compo…	--	--	--	--	--	Glycine-rich protein 5 OS=Arabidopsis thaliana OX=3702 GN=GRP5 PE=2 SV=1	S	Function unknown	glycine-rich protein 5-like [Brassica napus]
BraA10g024320.3C.gene	107	127	51	11	17	33	3.86021	4.38993	1.68692	0.358213	0.539864	1.14684	0.000935678	-2.3298	down	--	--	Molecular Function: peptide:proton symporter activity (GO:0015333);; Cellular Component: integral component of membrane (GO:0016021);; Molecular Function: oligopeptide transmembrane transporter activity (GO:0035673);; Molecular Function: peptide transmembrane transporter activity (GO:1904680);;	K14638|1.79e-84|cpap:110820281|K14638 solute carrier family 15 (peptide/histidine transporter), member 3/4 | (RefSeq) protein NRT1/ PTR FAMILY 5.9	--	[E]	Amino acid transport and metabolism	POT family	Protein NRT1/ PTR FAMILY 5.8 OS=Arabidopsis thaliana OX=3702 GN=NPF5.8 PE=2 SV=1	E	Amino acid transport and metabolism	protein NRT1/ PTR FAMILY 5.8 [Brassica rapa]
BraA05g006360.3C.gene	468	417	273	181	174	213	47.7245	40.7198	25.8209	16.8252	15.8795	21.481	0.000949831	-1.14987	down	--	--	--	--	--	--	--	DVL family	--	S	Function unknown	uncharacterized protein LOC103867019 [Brassica rapa]
BraA02g014190.3C.gene	2663	2291	1256	992	930	876	58.1672	47.9231	25.5179	19.8316	18.2125	18.9177	4.05195e-05	-1.28623	down	[Q]	Secondary metabolites biosynthesis, transport and catabolism	Molecular Function: homogentisate 1,2-dioxygenase activity (GO:0004411);; Biological Process: L-phenylalanine catabolic process (GO:0006559);; Biological Process: tyrosine metabolic process (GO:0006570);;	K00451|0.0|bna:106390253|K00451 homogentisate 1,2-dioxygenase [EC:1.13.11.5] | (RefSeq) homogentisate 1,2-dioxygenase	Tyrosine metabolism (ko00350)	[E]	Amino acid transport and metabolism	homogentisate 1,2-dioxygenase	Homogentisate 1,2-dioxygenase OS=Arabidopsis thaliana OX=3702 GN=HGO PE=2 SV=2	E	Amino acid transport and metabolism	homogentisate 1,2-dioxygenase [Brassica rapa]
BraA03g020400.3C.gene	27	49	40	135	108	73	0.819936	1.4346	1.12712	3.80277	2.9928	2.21704	0.00981442	1.32116	up	--	--	Molecular Function: calcium ion binding (GO:0005509);; Molecular Function: calcium-dependent phospholipid binding (GO:0005544);; Cellular Component: cytoplasm (GO:0005737);;	K17098|1.18e-226|brp:103857812|K17098 annexin D | (RefSeq) annexin D3	--	[U]	Intracellular trafficking, secretion, and vesicular transport	Annexin	Annexin D3 OS=Arabidopsis thaliana OX=3702 GN=ANN3 PE=2 SV=2	U	Intracellular trafficking, secretion, and vesicular transport	annexin D3 [Brassica rapa]
BraA09g009670.3C.gene	489	332	381	147	133	130	26.8731	17.4313	19.4732	7.37754	6.52863	7.06477	1.62382e-10	-1.67636	down	--	--	Biological Process: response to water (GO:0009415);;	--	--	--	--	Dehydrin	Dehydrin Rab18 OS=Arabidopsis thaliana OX=3702 GN=RAB18 PE=2 SV=1	S	Function unknown	dehydrin Rab18 [Brassica rapa]
BraA07g003770.3C.gene	35	41	59	100	156	120	0.596656	0.671976	0.946155	1.58415	2.41768	2.05517	0.00212642	1.3678	up	--	--	Biological Process: ribosome biogenesis (GO:0042254);;	K14771|0.0|brp:103845980|K14771 U3 small nucleolar RNA-associated protein 19 | (RefSeq) uncharacterized protein C1604.06c isoform X1	--	[J]	Translation, ribosomal structure and biogenesis	CBF/Mak21 family	Protein NUCLEOLAR COMPLEX ASSOCIATED 4 OS=Arabidopsis thaliana OX=3702 GN=NOC4 PE=2 SV=1	J	Translation, ribosomal structure and biogenesis	uncharacterized protein C1604.06c isoform X1 [Brassica rapa]
BraA08g026860.3C.gene	197	188	209	590	351	532	3.75493	3.42409	3.7093	10.3066	6.01149	10.049	5.83506e-05	1.20151	up	[E]	Amino acid transport and metabolism	Molecular Function: 3-deoxy-7-phosphoheptulonate synthase activity (GO:0003849);; Biological Process: aromatic amino acid family biosynthetic process (GO:0009073);; Biological Process: chorismate biosynthetic process (GO:0009423);; Cellular Component: chloroplast (GO:0009507);;	K01626|0.0|brp:103835703|K01626 3-deoxy-7-phosphoheptulonate synthase [EC:2.5.1.54] | (RefSeq) phospho-2-dehydro-3-deoxyheptonate aldolase 1, chloroplastic	Phenylalanine, tyrosine and tryptophan biosynthesis (ko00400);; Biosynthesis of amino acids (ko01230)	--	--	Class-II DAHP synthetase family	Phospho-2-dehydro-3-deoxyheptonate aldolase 1, chloroplastic OS=Nicotiana tabacum OX=4097 GN=DHAPS-1 PE=2 SV=1	E	Amino acid transport and metabolism	phospho-2-dehydro-3-deoxyheptonate aldolase 1, chloroplastic [Brassica rapa]
BraA05g032240.3C.gene	130	214	215	661	646	627	2.17324	3.42743	3.34504	10.137	9.7193	10.3945	5.30468e-14	1.68212	up	--	--	Molecular Function: protein kinase activity (GO:0004672);; Molecular Function: ATP binding (GO:0005524);; Cellular Component: integral component of membrane (GO:0016021);;	K19891|2.56e-13|gmx:100776826|K19891 glucan endo-1,3-beta-glucosidase 1/2/3 [EC:3.2.1.39] | (RefSeq) glucan endo-1,3-beta-glucosidase 1	Starch and sucrose metabolism (ko00500)	--	--	Leucine rich repeat	Probable leucine-rich repeat receptor-like serine/threonine-protein kinase At3g14840 OS=Arabidopsis thaliana OX=3702 GN=LRR-RLK PE=1 SV=1	T	Signal transduction mechanisms	probable leucine-rich repeat receptor-like serine/threonine-protein kinase At3g14840 isoform X1 [Brassica rapa]
BraA09g050440.3C.gene	286	282	215	93	124	119	16.5013	15.5817	11.5456	4.91113	6.42328	6.80743	2.17202e-05	-1.34181	down	--	--	Biological Process: response to auxin (GO:0009733);;	K14488|4.36e-123|brp:103841914|K14488 SAUR family protein | (RefSeq) auxin-responsive protein SAUR36	Plant hormone signal transduction (ko04075)	--	--	Auxin responsive protein	Auxin-responsive protein SAUR36 OS=Arabidopsis thaliana OX=3702 GN=SAUR36 PE=2 SV=1	S	Function unknown	auxin-responsive protein SAUR36 [Brassica rapa]
BraA09g047910.3C.gene	36	77	53	456	373	607	1.05679	2.19659	1.46207	12.5123	10.014	17.9951	1.64659e-18	3.01688	up	--	--	Molecular Function: hydrolase activity, hydrolyzing O-glycosyl compounds (GO:0004553);; Cellular Component: cell wall (GO:0005618);; Biological Process: carbohydrate metabolic process (GO:0005975);; Cellular Component: anchored component of plasma membrane (GO:0046658);;	K19891|9.45e-64|csat:104789925|K19891 glucan endo-1,3-beta-glucosidase 1/2/3 [EC:3.2.1.39] | (RefSeq) glucan endo-1,3-beta-glucosidase 3-like	Starch and sucrose metabolism (ko00500)	--	--	Glycosyl hydrolases family 17	Glucan endo-1,3-beta-glucosidase, acidic isoform OS=Arabidopsis thaliana OX=3702 GN=BG2 PE=1 SV=2	G	Carbohydrate transport and metabolism	glucan endo-1,3-beta-glucosidase, acidic isoform [Brassica rapa]
BraA02g043210.3C.gene	221	83	91	6	10	26	4.83075	1.73615	1.85447	0.118791	0.189522	0.546297	4.17694e-06	-3.33929	down	--	--	Cellular Component: integral component of membrane (GO:0016021);;	--	--	--	--	Stress up-regulated Nod 19	--	S	Function unknown	uncharacterized protein LOC103854962 [Brassica rapa]
BraA04g018050.3C.gene	407	426	141	97	118	131	15.5322	15.5704	4.97786	3.39034	4.03196	4.94542	0.00151731	-1.6235	down	--	--	--	--	--	[K]	Transcription	--	--	K	Transcription	uncharacterized protein LOC103864560 [Brassica rapa]
BraA09g006480.3C.gene	229	171	294	96	122	128	8.12835	5.81311	9.71484	3.10485	3.89054	4.4832	0.0020299	-1.10991	down	--	--	Cellular Component: plasma membrane (GO:0005886);; Biological Process: carbohydrate transport (GO:0008643);; Cellular Component: integral component of membrane (GO:0016021);; Molecular Function: sugar transmembrane transporter activity (GO:0051119);;	K15382|5.83e-190|brp:103865612|K15382 solute carrier family 50 (sugar transporter) | (RefSeq) bidirectional sugar transporter SWEET12	--	[R]	General function prediction only	Sugar efflux transporter for intercellular exchange	Bidirectional sugar transporter SWEET12 OS=Arabidopsis thaliana OX=3702 GN=SWEET12 PE=1 SV=1	U	Intracellular trafficking, secretion, and vesicular transport	bidirectional sugar transporter SWEET12 [Brassica rapa]
BraA02g040140.3C.gene	4142	3687	2070	1636	1465	1735	53.0241	45.1919	24.6417	19.1665	16.8256	21.9752	0.000195705	-1.16073	down	[G]	Carbohydrate transport and metabolism	Molecular Function: hydrolase activity, hydrolyzing O-glycosyl compounds (GO:0004553);; Biological Process: carbohydrate metabolic process (GO:0005975);;	K15920|2.51e-316|cit:102619285|K15920 xylan 1,4-beta-xylosidase [EC:3.2.1.37] | (RefSeq) beta-xylosidase/alpha-L-arabinofuranosidase 2	Amino sugar and nucleotide sugar metabolism (ko00520)	--	--	Glycosyl hydrolase family 3 C-terminal domain	Beta-D-xylosidase 1 OS=Arabidopsis thaliana OX=3702 GN=BXL1 PE=1 SV=1	G	Carbohydrate transport and metabolism	beta-D-xylosidase 1 [Brassica rapa]
BraA08g020660.3C.gene	82	235	66	37	50	27	3.9968	10.949	2.98688	1.61593	2.15485	1.26579	0.00570784	-1.88454	down	--	--	--	--	--	[BK]	Chromatin structure and dynamics;; Transcription	Divergent CRAL/TRIO domain	--	--	--	ganglioside-induced differentiation-associated protein 2 [Brassica rapa]
BraA07g002050.3C.gene	81	180	134	555	614	752	6.09703	13.0989	9.4557	38.6607	41.8702	56.6159	2.77988e-12	2.18262	up	--	--	Biological Process: immune system process (GO:0002376);; Cellular Component: cellular_component (GO:0005575);; Cellular Component: extracellular region (GO:0005576);; Cellular Component: cell wall (GO:0005618);; Cellular Component: obsolete cell (GO:0005623);; Biological Process: generation of precursor metabolites and energy (GO:0006091);; Biological Process: response to stress (GO:0006950);; Bi…	--	--	--	--	Lytic transglycolase	EG45-like domain containing protein 2 OS=Arabidopsis thaliana OX=3702 GN=EGC2 PE=2 SV=2	S	Function unknown	EG45-like domain containing protein 2 isoform X1 [Brassica rapa]
BraA10g021870.3C.gene	469	461	413	234	264	208	11.7923	11.0986	9.65549	5.37792	5.94571	5.16977	5.80074e-07	-1.05299	down	--	--	Molecular Function: DNA binding (GO:0003677);; Cellular Component: nucleus (GO:0005634);;	K12580|2.19e-99|aly:110227739|K12580 CCR4-NOT transcription complex subunit 3 | (RefSeq) myb-related protein 1-like isoform X1	RNA degradation (ko03018)	--	--	MYB-CC type transfactor, LHEQLE motif	Myb-related protein 1 OS=Arabidopsis thaliana OX=3702 GN=MYR1 PE=1 SV=1	K	Transcription	myb-related protein 1 isoform X1 [Brassica rapa]
BraA02g006230.3C.gene	361	247	148	69	121	105	11.282	7.38411	4.30251	1.9648	3.37926	3.24991	0.00235521	-1.49258	down	--	--	Cellular Component: nucleus (GO:0005634);; Molecular Function: zinc ion binding (GO:0008270);; Biological Process: regulation of flower development (GO:0009909);;	K12135|1.19e-82|aly:9307757|K12135 zinc finger protein CONSTANS | (RefSeq) zinc finger protein CONSTANS	Circadian rhythm - plant (ko04712)	[K]	Transcription	CCT motif	Zinc finger protein CONSTANS-LIKE 1 OS=Arabidopsis thaliana OX=3702 GN=COL1 PE=1 SV=1	K	Transcription	zinc finger protein CONSTANS-LIKE 1 [Brassica rapa]
BraA05g041410.3C.gene	2591	1541	1140	829	839	845	55.847	31.801	22.8454	16.3573	16.2172	18.0173	0.000558093	-1.20459	down	[T]	Signal transduction mechanisms	Molecular Function: protein serine/threonine phosphatase activity (GO:0004722);; Molecular Function: magnesium-dependent protein serine/threonine phosphatase activity (GO:0004724);;	K17506|1.20e-25|mng:MNEG_3991|K17506 protein phosphatase 1L [EC:3.1.3.16] | (RefSeq) hypothetical protein	--	[T]	Signal transduction mechanisms	Protein phosphatase 2C	Probable protein phosphatase 2C 33 OS=Arabidopsis thaliana OX=3702 GN=PPC6-1 PE=1 SV=1	T	Signal transduction mechanisms	probable protein phosphatase 2C 33 isoform X1 [Brassica rapa]
BraA09g062380.3C.gene	494	320	166	63	169	105	15.1234	9.37172	4.71011	1.75329	4.61867	3.18151	0.00283075	-1.68725	down	[M]	Cell wall/membrane/envelope biogenesis	Molecular Function: catalytic activity (GO:0003824);;	K09753|8.93e-89|ini:109164749|K09753 cinnamoyl-CoA reductase [EC:1.2.1.44] | (RefSeq) cinnamoyl-CoA reductase 1-like	Phenylpropanoid biosynthesis (ko00940)	[V]	Defense mechanisms	NAD dependent epimerase/dehydratase family	Phenylacetaldehyde reductase OS=Rosa hybrid cultivar OX=128735 GN=PAR PE=1 SV=1	V	Defense mechanisms	cinnamoyl-CoA reductase 1 [Brassica rapa]
BraA06g037750.3C.gene	591	582	562	237	423	206	20.7253	19.5529	18.3155	7.60999	13.311	7.13281	0.000239303	-1.13719	down	--	--	--	--	--	--	--	--	--	S	Function unknown	uncharacterized protein LOC103875234 [Brassica rapa]
BraA01g013420.3C.gene	99	127	110	60	69	45	1.9224	2.38186	1.99345	1.06831	1.2032	0.866645	0.00838981	-1.07423	down	--	--	Molecular Function: antiporter activity (GO:0015297);; Cellular Component: integral component of membrane (GO:0016021);; Molecular Function: xenobiotic transmembrane transporter activity (GO:0042910);;	K03327|0.0|bna:106440845|K03327 multidrug resistance protein, MATE family | (RefSeq) protein DETOXIFICATION 56-like	--	[R]	General function prediction only	MatE	Protein DETOXIFICATION 56 OS=Arabidopsis thaliana OX=3702 GN=DTX56 PE=1 SV=1	V	Defense mechanisms	protein DETOXIFICATION 56 [Brassica rapa]
BraA08g010250.3C.gene	129	89	125	335	246	280	3.36927	2.23547	3.04103	8.03947	5.77341	7.26379	0.000114701	1.21114	up	--	--	--	K20783|5.76e-06|sita:101755814|K20783 arabinosyltransferase [EC:2.4.2.-] | (RefSeq) arabinosyltransferase RRA3	Other types of O-glycan biosynthesis (ko00514)	--	--	Nucleotide-diphospho-sugar transferase	Uncharacterized protein At4g15970 OS=Arabidopsis thaliana OX=3702 GN=At4g15970 PE=2 SV=1	--	--	BnaA08g08060D [Brassica napus]
BraA03g031300.3C.gene	7520	5432	3654	2579	3121	2591	147.644	102.141	66.7185	46.3549	54.968	50.3356	0.000143464	-1.13957	down	[QV]	Secondary metabolites biosynthesis, transport and catabolism;; Defense mechanisms	Molecular Function: iron ion binding (GO:0005506);; Cellular Component: membrane (GO:0016020);; Cellular Component: integral component of membrane (GO:0016021);; Molecular Function: oxidoreductase activity, acting on paired donors, with incorporation or reduction of molecular oxygen, NAD(P)H as one donor, and incorporation of one atom of oxygen (GO:0016709);; Molecular Function: heme binding (GO:…	K24187|0.0|bna:106438959|K24187 cytochrome P450 family 89 subfamily A polypeptide 9 [EC:1.14.-.-] | (RefSeq) cytochrome P450 89A9	--	[Q]	Secondary metabolites biosynthesis, transport and catabolism	Cytochrome P450	Cytochrome P450 89A9 OS=Arabidopsis thaliana OX=3702 GN=CYP89A9 PE=2 SV=1	Q	Secondary metabolites biosynthesis, transport and catabolism	cytochrome P450 89A9 [Brassica rapa]
NewGene_467	73	94	47	18	11	30	2.34028	2.90189	1.39642	0.529754	0.291763	0.93756	0.00535983	-1.96195	down	--	--	--	--	--	--	--	--	--	--	--	hypothetical protein DY000_02058713 [Brassica cretica]
BraA08g019420.3C.gene	506	775	144	41	51	77	19.9429	29.248	5.25379	1.45177	1.77295	2.9994	0.00102916	-3.19348	down	--	--	--	--	--	--	--	Aluminium induced protein	Stem-specific protein TSJT1 OS=Nicotiana tabacum OX=4097 GN=TSJT1 PE=2 SV=1	S	Function unknown	stem-specific protein TSJT1 [Brassica rapa]
BraA05g002030.3C.gene	753	581	265	175	248	169	18.8073	13.8958	6.14786	3.99785	5.54349	4.16694	0.00036129	-1.58083	down	--	--	Cellular Component: Golgi apparatus (GO:0005794);; Biological Process: fucose metabolic process (GO:0006004);; Molecular Function: transferase activity, transferring glycosyl groups (GO:0016757);;	--	--	--	--	GDP-fucose protein O-fucosyltransferase	--	--	--	uncharacterized protein LOC103866534 isoform X1 [Brassica rapa]
BraA03g007300.3C.gene	705	709	404	242	323	306	40.9886	39.5048	21.8251	12.8629	16.8571	17.5739	0.000424422	-1.18847	down	--	--	--	--	--	--	--	--	--	--	--	uncharacterized protein LOC103856181 [Brassica rapa]
BraA07g015310.3C.gene	208	92	104	22	16	23	9.64617	4.0573	4.45434	0.912613	0.650564	1.05649	8.27697e-08	-2.85621	down	[P]	Inorganic ion transport and metabolism	Molecular Function: iron ion transmembrane transporter activity (GO:0005381);; Molecular Function: manganese ion transmembrane transporter activity (GO:0005384);; Biological Process: intracellular sequestering of iron ion (GO:0006880);; Cellular Component: membrane (GO:0016020);; Cellular Component: integral component of membrane (GO:0016021);; Biological Process: cellular manganese ion homeostas…	K22736|5.30e-130|bna:106358204|K22736 vacuolar iron transporter family protein | (RefSeq) vacuolar iron transporter homolog 1-like	--	[S]	Function unknown	VIT family	Vacuolar iron transporter homolog 1 OS=Arabidopsis thaliana OX=3702 GN=VTL1 PE=2 SV=1	S	Function unknown	vacuolar iron transporter homolog 1-like [Brassica napus]
BraA10g015660.3C.gene	27	54	66	266	375	350	0.925902	1.7851	2.11817	8.45889	11.723	12.0532	2.5796e-14	2.65321	up	[G]	Carbohydrate transport and metabolism	Molecular Function: hydrolase activity, hydrolyzing O-glycosyl compounds (GO:0004553);; Cellular Component: cell wall (GO:0005618);; Biological Process: xyloglucan metabolic process (GO:0010411);; Molecular Function: xyloglucan:xyloglucosyl transferase activity (GO:0016762);; Biological Process: cell wall biogenesis (GO:0042546);; Cellular Component: apoplast (GO:0048046);; Biological Process: ce…	K14504|1.94e-216|brp:103845192|K14504 xyloglucan:xyloglucosyl transferase TCH4 [EC:2.4.1.207] | (RefSeq) xyloglucan endotransglucosylase/hydrolase protein 22	Plant hormone signal transduction (ko04075)	--	--	Glycosyl hydrolases family 16	Xyloglucan endotransglucosylase/hydrolase protein 22 OS=Arabidopsis thaliana OX=3702 GN=XTH22 PE=1 SV=1	G	Carbohydrate transport and metabolism	xyloglucan endotransglucosylase/hydrolase protein 22 [Brassica rapa]
BraA03g036580.3C.gene	1776	868	819	529	599	500	34.2603	16.0303	14.693	9.3395	10.3633	9.53672	0.000906395	-1.22949	down	[QV]	Secondary metabolites biosynthesis, transport and catabolism;; Defense mechanisms	Molecular Function: iron ion binding (GO:0005506);; Cellular Component: integral component of membrane (GO:0016021);; Molecular Function: oxidoreductase activity, acting on paired donors, with incorporation or reduction of molecular oxygen (GO:0016705);; Molecular Function: heme binding (GO:0020037);;	K24179|3.75e-201|pvu:PHAVU_011G000200g|K24179 cytochrome P450 family 72 subfamily A polypeptide 61 [EC:1.14.14.-] | (RefSeq) hypothetical protein	--	[QI]	Secondary metabolites biosynthesis, transport and catabolism;; Lipid transport and metabolism	Cytochrome P450	Cytochrome P450 72A15 OS=Arabidopsis thaliana OX=3702 GN=CYP72A15 PE=2 SV=1	--	--	cytochrome P450 72A15 [Brassica rapa]
BraA03g059850.3C.gene	1132	892	444	121	148	217	45.503	34.3316	16.608	4.43794	5.3336	8.62698	8.378e-10	-2.46447	down	--	--	Molecular Function: protein dimerization activity (GO:0046983);;	--	--	--	--	Helix-loop-helix DNA-binding domain	Transcription factor bHLH11 OS=Arabidopsis thaliana OX=3702 GN=BHLH11 PE=2 SV=2	K	Transcription	transcription factor bHLH11 isoform X1 [Brassica rapa]
BraA09g039960.3C.gene	190	103	166	59	73	66	3.41482	1.76861	2.76604	0.965304	1.1732	1.17249	0.00171809	-1.33352	down	[GI]	Carbohydrate transport and metabolism;; Lipid transport and metabolism	Molecular Function: pectinesterase activity (GO:0030599);; Biological Process: cell wall modification (GO:0042545);; Molecular Function: aspartyl esterase activity (GO:0045330);; Biological Process: pectin catabolic process (GO:0045490);; Molecular Function: pectinesterase inhibitor activity (GO:0046910);;	K01051|4.16e-196|nnu:104607345|K01051 pectinesterase [EC:3.1.1.11] | (RefSeq) pectinesterase-like	Pentose and glucuronate interconversions (ko00040)	--	--	Pectinesterase	Probable pectinesterase/pectinesterase inhibitor 6 OS=Arabidopsis thaliana OX=3702 GN=PME6 PE=2 SV=1	G	Carbohydrate transport and metabolism	probable pectinesterase/pectinesterase inhibitor 6 [Brassica rapa]
BraA09g009250.3C.gene	28	37	59	122	140	112	0.346011	0.439717	0.674393	1.38966	1.55698	1.38059	0.000821349	1.48466	up	[E]	Amino acid transport and metabolism	Molecular Function: serine-type endopeptidase activity (GO:0004252);; Molecular Function: serine-type exopeptidase activity (GO:0070008);;	K01354|5.84e-80|mng:MNEG_4759|K01354 oligopeptidase B [EC:3.4.21.83] | (RefSeq) oligopeptidase B	--	[O]	Posttranslational modification, protein turnover, chaperones	Prolyl oligopeptidase, N-terminal beta-propeller domain	--	O	Posttranslational modification, protein turnover, chaperones	dipeptidyl aminopeptidase BI [Brassica rapa]
BraA01g002770.3C.gene	567	535	176	69	144	136	30.6153	27.655	8.84792	3.40749	6.97828	7.24255	0.000199826	-2.00527	down	[P]	Inorganic ion transport and metabolism	Biological Process: response to acid chemical (GO:0001101);; Cellular Component: cellular_component (GO:0005575);; Cellular Component: intracellular (GO:0005622);; Cellular Component: obsolete cell (GO:0005623);; Cellular Component: cytoplasm (GO:0005737);; Biological Process: response to stress (GO:0006950);; Biological Process: response to oxidative stress (GO:0006979);; Biological Process: agi…	K22547|1.99e-33|mus:103995019|K22547 arsenate reductase [EC:1.20.4.1] | (RefSeq) thiosulfate sulfurtransferase 18-like	--	[P]	Inorganic ion transport and metabolism	Rhodanese-like domain	Senescence-associated protein DIN1 OS=Raphanus sativus OX=3726 GN=DIN1 PE=2 SV=1	P	Inorganic ion transport and metabolism	senescence-associated protein DIN1 isoform X1 [Brassica rapa]
BraA01g009280.3C.gene	5	11	0	249	390	150	0.078405	0.166868	0	3.67779	5.64098	2.39009	4.38304e-05	5.4622	up	--	--	Cellular Component: peroxisome (GO:0005777);; Biological Process: regulation of gene expression (GO:0010468);;	--	--	[R]	General function prediction only	NYN domain	--	--	--	uncharacterized protein LOC103855620 [Brassica rapa]
BraA07g033810.3C.gene	551	385	203	189	160	110	6.89222	4.60953	2.3537	2.16171	1.78882	1.35181	0.00162376	-1.46315	down	--	--	Cellular Component: integral component of membrane (GO:0016021);;	K24195|0.0|brp:103831287|K24195 xenotropic and polytropic retrovirus receptor 1 | (RefSeq) phosphate transporter PHO1 homolog 1	--	[U]	Intracellular trafficking, secretion, and vesicular transport	EXS family	Phosphate transporter PHO1 homolog 1 OS=Arabidopsis thaliana OX=3702 GN=PHO1-H1 PE=2 SV=1	U	Intracellular trafficking, secretion, and vesicular transport	phosphate transporter PHO1 homolog 1 [Brassica rapa]
BraA01g015020.3C.gene	108	104	108	40	47	23	1.73887	1.59962	1.62342	0.588486	0.678369	0.357634	0.000121138	-1.67272	down	[Q]	Secondary metabolites biosynthesis, transport and catabolism	Molecular Function: cellulase activity (GO:0008810);; Cellular Component: integral component of membrane (GO:0016021);; Biological Process: cellulose catabolic process (GO:0030245);;	K01179|0.0|brp:103861904|K01179 endoglucanase [EC:3.2.1.4] | (RefSeq) endoglucanase 21	Starch and sucrose metabolism (ko00500)	--	--	Glycosyl hydrolase family 9	Endoglucanase 21 OS=Arabidopsis thaliana OX=3702 GN=KOR3 PE=2 SV=1	G	Carbohydrate transport and metabolism	endoglucanase 21 [Brassica rapa]
BraA01g025550.3C.gene	1418	758	545	419	499	356	36.0708	18.4584	12.8856	9.75719	11.3702	8.94356	0.00265224	-1.24332	down	--	--	Molecular Function: DNA-binding transcription factor activity (GO:0003700);; Cellular Component: nucleus (GO:0005634);; Molecular Function: metal ion binding (GO:0046872);;	K12309|6.76e-84|lja:Lj3g3v0323160.1|K12309 beta-galactosidase [EC:3.2.1.23] | (RefSeq) Lj3g3v0323160.1; -	Galactose metabolism (ko00052);; Other glycan degradation (ko00511);; Glycosaminoglycan degradation (ko00531);; Sphingolipid metabolism (ko00600);; Glycosphingolipid biosynthesis - ganglio series (ko00604)	[R]	General function prediction only	Zinc-finger double-stranded RNA-binding	Zinc finger protein BALDIBIS OS=Arabidopsis thaliana OX=3702 GN=BIB PE=1 SV=1	K	Transcription	zinc finger protein BALDIBIS isoform X3 [Brassica rapa]
BraA03g022840.3C.gene	147	102	115	1244	1115	2209	5.11358	3.40537	3.73762	39.8246	34.9555	76.4122	3.30179e-30	3.55282	up	[R]	General function prediction only	Molecular Function: chitinase activity (GO:0004568);; Biological Process: carbohydrate metabolic process (GO:0005975);; Biological Process: chitin catabolic process (GO:0006032);; Molecular Function: chitin binding (GO:0008061);; Biological Process: cell wall macromolecule catabolic process (GO:0016998);;	K01183|8.81e-208|brp:103858078|K01183 chitinase [EC:3.2.1.14] | (RefSeq) endochitinase CHI	Amino sugar and nucleotide sugar metabolism (ko00520)	[R]	General function prediction only	Chitinase class I	Endochitinase CHI OS=Arabidopsis thaliana OX=3702 GN=CHI PE=2 SV=1	S	Function unknown	endochitinase CHI [Brassica rapa]
BraA07g019560.3C.gene	346	237	176	140	114	132	7.83232	5.15114	3.71088	2.89048	2.30458	2.95423	0.00811193	-1.10548	down	[O]	Posttranslational modification, protein turnover, chaperones	Molecular Function: serine-type endopeptidase activity (GO:0004252);; Cellular Component: integral component of membrane (GO:0016021);;	--	--	[T]	Signal transduction mechanisms	Rhomboid family	RHOMBOID-like protein 9, chloroplastic OS=Arabidopsis thaliana OX=3702 GN=RBL9 PE=2 SV=1	T	Signal transduction mechanisms	RHOMBOID-like protein 9, chloroplastic [Brassica rapa]
BraA09g044870.3C.gene	286	204	202	90	89	108	4.85199	3.30828	3.17334	1.3909	1.35153	1.80039	5.69334e-05	-1.3888	down	[E]	Amino acid transport and metabolism	Molecular Function: peptide:proton symporter activity (GO:0015333);; Cellular Component: integral component of membrane (GO:0016021);; Molecular Function: oligopeptide transmembrane transporter activity (GO:0035673);; Molecular Function: peptide transmembrane transporter activity (GO:1904680);;	K14638|1.37e-261|cann:107843454|K14638 solute carrier family 15 (peptide/histidine transporter), member 3/4 | (RefSeq) protein NRT1/ PTR FAMILY 5.6-like	--	[E]	Amino acid transport and metabolism	POT family	Protein NRT1/ PTR FAMILY 5.7 OS=Arabidopsis thaliana OX=3702 GN=NPF5.7 PE=2 SV=2	E	Amino acid transport and metabolism	protein NRT1/ PTR FAMILY 5.7 [Brassica napus]
NewGene_1297	603	439	277	189	219	218	11.0422	7.75961	4.73849	3.14541	3.62698	3.95716	0.00188594	-1.20744	down	[I]	Lipid transport and metabolism	--	--	--	--	--	--	--	S	Function unknown	uncharacterized protein LOC103831851 isoform X2 [Brassica rapa]
BraA05g016240.3C.gene	191	239	302	748	604	333	31.4664	37.657	46.2617	112.936	89.2735	54.2343	0.00216177	1.07605	up	--	--	Cellular Component: integral component of membrane (GO:0016021);;	--	--	--	--	--	Arabinogalactan protein 12 OS=Arabidopsis thaliana OX=3702 GN=AGP12 PE=1 SV=1	--	--	arabinogalactan protein 21 [Brassica rapa]
BraA05g032220.3C.gene	51	74	79	211	213	192	3.52705	4.96447	5.13577	13.5558	13.3503	13.2753	1.0728e-06	1.48201	up	--	--	Molecular Function: protein kinase activity (GO:0004672);; Molecular Function: ATP binding (GO:0005524);; Cellular Component: integral component of membrane (GO:0016021);;	--	--	--	--	--	Probable leucine-rich repeat receptor-like serine/threonine-protein kinase At3g14840 OS=Arabidopsis thaliana OX=3702 GN=LRR-RLK PE=1 SV=1	T	Signal transduction mechanisms	hypothetical protein BRARA_E02649 [Brassica rapa]
BraA03g012750.3C.gene	14402	8198	2189	988	1249	1271	197.122	107.45	27.8573	12.3772	15.3272	17.2087	0.00334136	-2.96918	down	[G]	Carbohydrate transport and metabolism	Molecular Function: beta-galactosidase activity (GO:0004565);; Cellular Component: cell wall (GO:0005618);; Cellular Component: vacuole (GO:0005773);; Biological Process: carbohydrate metabolic process (GO:0005975);;	K12309|0.0|eus:EUTSA_v10010152mg|K12309 beta-galactosidase [EC:3.2.1.23] | (RefSeq) hypothetical protein	Galactose metabolism (ko00052);; Other glycan degradation (ko00511);; Glycosaminoglycan degradation (ko00531);; Sphingolipid metabolism (ko00600);; Glycosphingolipid biosynthesis - ganglio series (ko00604)	[G]	Carbohydrate transport and metabolism	Glycosyl hydrolases family 35	Beta-galactosidase 4 OS=Arabidopsis thaliana OX=3702 GN=BGAL4 PE=1 SV=1	G	Carbohydrate transport and metabolism	beta-galactosidase 4 [Brassica rapa]
BraA03g026730.3C.gene	1100	782	577	330	348	356	31.8188	21.6607	15.5023	8.7167	9.02949	10.1896	7.2906e-06	-1.37994	down	[E]	Amino acid transport and metabolism	Molecular Function: agmatinase activity (GO:0008783);; Biological Process: putrescine biosynthetic process from arginine, using agmatinase (GO:0033389);; Molecular Function: metal ion binding (GO:0046872);;	K01476|5.51e-243|brp:103858497|K01476 arginase [EC:3.5.3.1] | (RefSeq) arginase 1, mitochondrial	Arginine biosynthesis (ko00220);; Arginine and proline metabolism (ko00330);; Biosynthesis of amino acids (ko01230)	[E]	Amino acid transport and metabolism	Arginase family	Arginase 1, mitochondrial OS=Arabidopsis thaliana OX=3702 GN=ARGAH1 PE=1 SV=1	E	Amino acid transport and metabolism	arginase 1, mitochondrial [Brassica rapa]
BraA03g059840.3C.gene	9740	7979	4675	3595	3985	4454	594.969	466.763	265.568	201.026	218.362	269.208	0.00158232	-1.02332	down	[O]	Posttranslational modification, protein turnover, chaperones	Cellular Component: cellular_component (GO:0005575);; Cellular Component: intracellular (GO:0005622);; Cellular Component: obsolete cell (GO:0005623);; Cellular Component: nucleus (GO:0005634);; Cellular Component: cytoplasm (GO:0005737);; Cellular Component: chloroplast (GO:0009507);; Cellular Component: plastid (GO:0009536);; Cellular Component: organelle (GO:0043226);; Cellular Component: memb…	K09517|3.29e-13|pavi:110749344|K09517 DnaJ homolog subfamily B member 11 | (RefSeq) dnaJ protein ERDJ3B	Protein processing in endoplasmic reticulum (ko04141)	[O]	Posttranslational modification, protein turnover, chaperones	DnaJ domain	Chaperone protein dnaJ 11, chloroplastic OS=Arabidopsis thaliana OX=3702 GN=ATJ11 PE=1 SV=2	O	Posttranslational modification, protein turnover, chaperones	chaperone protein dnaJ 11, chloroplastic [Brassica rapa]
BraA03g013660.3C.gene	824	404	309	231	199	251	43.1292	20.2176	15.0052	11.0473	9.34823	12.9702	0.0048734	-1.30834	down	--	--	Cellular Component: plasma membrane (GO:0005886);; Cellular Component: integral component of membrane (GO:0016021);;	K20855|1.06e-53|dzi:111275668|K20855 beta-1,3-galactosyltransferase 1/2/3/4/5/7/8 [EC:2.4.1.-] | (RefSeq) probable beta-1,3-galactosyltransferase 4 isoform X1	--	--	--	Domain of unknown function (DUF588)	CASP-like protein 2D1 OS=Arabidopsis thaliana OX=3702 GN=At5g54980 PE=2 SV=1	S	Function unknown	CASP-like protein 2D1 [Brassica rapa]
BraA08g032340.3C.gene	164	221	113	772	497	953	6.21497	8.00682	3.97015	26.7639	16.8969	35.7442	2.01098e-08	2.05077	up	--	--	Cellular Component: cytoplasm (GO:0005737);; Molecular Function: intramolecular transferase activity, phosphotransferases (GO:0016868);;	--	--	[G]	Carbohydrate transport and metabolism	Histidine phosphatase superfamily (branch 1)	Phosphoglycerate mutase-like protein OS=Arabidopsis thaliana OX=3702 GN=PGM PE=2 SV=1	G	Carbohydrate transport and metabolism	phosphoglycerate mutase-like protein isoform X2 [Brassica rapa]
BraA02g017790.3C.gene	70	120	104	263	279	230	6.58727	10.8609	9.11782	22.8353	23.7739	21.6262	2.94412e-05	1.27729	up	--	--	Biological Process: defense response (GO:0006952);;	--	--	--	--	--	Thionin-2.1 OS=Arabidopsis thaliana OX=3702 GN=THI2.1 PE=2 SV=1	--	--	thionin [Brassica rapa]
BraA03g013160.3C.gene	233	193	84	19	57	67	7.04852	5.60218	2.34627	0.520071	1.53084	1.98654	0.00387678	-1.95518	down	--	--	Cellular Component: integral component of membrane (GO:0016021);;	K13148|1.46e-26|pop:7459752|K13148 integrator complex subunit 11 [EC:3.1.27.-] | (RefSeq) LOW QUALITY PROTEIN: cleavage and polyadenylation specificity factor subunit 3-II	--	[O]	Posttranslational modification, protein turnover, chaperones	Ring finger domain	RING-H2 finger protein ATL20 OS=Arabidopsis thaliana OX=3702 GN=ATL20 PE=2 SV=2	O	Posttranslational modification, protein turnover, chaperones	E3 ubiquitin-protein ligase At4g11680 [Brassica rapa]
BraA03g000160.3C.gene	328	255	82	57	59	51	18.9284	14.0864	4.40053	2.99881	3.03164	2.89805	0.000195705	-2.14083	down	--	--	--	--	--	--	--	Protein of unknown function, DUF538	Uncharacterized protein At5g01610 OS=Arabidopsis thaliana OX=3702 GN=At5g01610 PE=1 SV=1	S	Function unknown	uncharacterized protein At5g01610 [Brassica rapa]
BraA06g015200.3C.gene	1492	1107	837	568	626	426	23.9603	17.0283	12.5004	8.34458	9.01464	6.76792	2.49619e-05	-1.22634	down	--	--	Biological Process: reproduction (GO:0000003);; Biological Process: microtubule cytoskeleton organization (GO:0000226);; Biological Process: developmental process involved in reproduction (GO:0003006);; Molecular Function: molecular_function (GO:0003674);; Molecular Function: transporter activity (GO:0005215);; Molecular Function: lipid transporter activity (GO:0005319);; Molecular Function: phos…	K02433|4.95e-62|apro:F751_6020|K02433 aspartyl-tRNA(Asn)/glutamyl-tRNA(Gln) amidotransferase subunit A [EC:6.3.5.6 6.3.5.7] | (RefSeq) Glutamyl-tRNA(Gln) amidotransferase subunit A	Aminoacyl-tRNA biosynthesis (ko00970)	[I]	Lipid transport and metabolism	CRAL/TRIO domain	Phosphatidylinositol/phosphatidylcholine transfer protein SFH4 OS=Arabidopsis thaliana OX=3702 GN=SFH4 PE=2 SV=1	I	Lipid transport and metabolism	phosphatidylinositol/phosphatidylcholine transfer protein SFH4 [Brassica napus]
BraA05g029670.3C.gene	611	646	405	284	309	305	17.7771	17.9894	10.9462	7.54451	8.0503	8.76316	0.000580839	-1.01304	down	--	--	Biological Process: response to acid chemical (GO:0001101);; Molecular Function: molecular_function (GO:0003674);; Molecular Function: transcription coregulator activity (GO:0003712);; Molecular Function: transcription corepressor activity (GO:0003714);; Molecular Function: binding (GO:0005488);; Molecular Function: protein binding (GO:0005515);; Cellular Component: cellular_component (GO:0005575…	K13464|9.01e-231|brp:103869637|K13464 jasmonate ZIM domain-containing protein | (RefSeq) protein TIFY 6B	Plant hormone signal transduction (ko04075)	--	--	tify domain	Protein TIFY 6B OS=Arabidopsis thaliana OX=3702 GN=TIFY6B PE=1 SV=1	K	Transcription	unnamed protein product [Brassica rapa]
BraA04g024190.3C.gene	65	123	53	283	199	316	0.938343	1.69894	0.712085	3.75455	2.5781	4.52639	0.000482414	1.61808	up	--	--	Molecular Function: protein binding (GO:0005515);;	K13466|1.92e-06|cic:CICLE_v10027645mg|K13466 EIX receptor 1/2 | (RefSeq) hypothetical protein	Plant-pathogen interaction (ko04626)	[R]	General function prediction only	Leucine rich repeat	Receptor like protein 24 OS=Arabidopsis thaliana OX=3702 GN=RLP24 PE=3 SV=1	S	Function unknown	receptor like protein 30-like [Brassica napus]
BraA02g015450.3C.gene	465	305	254	48	130	137	8.25826	5.18436	4.1872	0.775009	2.06824	2.39631	0.00031055	-1.81945	down	--	--	Biological Process: response to abscisic acid (GO:0009737);;	--	--	--	--	CAP160 repeat	Low-temperature-induced 65 kDa protein OS=Arabidopsis thaliana OX=3702 GN=LTI65 PE=2 SV=2	S	Function unknown	low-temperature-induced 65 kDa protein [Brassica rapa]
BraA02g043400.3C.gene	61	64	81	27	29	26	2.02373	2.00918	2.50043	0.817429	0.842206	0.837075	0.00399255	-1.4422	down	--	--	Molecular Function: chaperone binding (GO:0051087);;	--	--	[T]	Signal transduction mechanisms	BAG domain	BAG family molecular chaperone regulator 2 OS=Arabidopsis thaliana OX=3702 GN=BAG2 PE=1 SV=1	T	Signal transduction mechanisms	BAG family molecular chaperone regulator 2 [Brassica rapa]
BraA10g002170.3C.gene	1343	1173	575	352	386	555	43.4035	36.3245	17.2746	10.4068	11.199	17.7492	0.000812941	-1.377	down	--	--	--	K18643|2.03e-62|gra:105795008|K18643 katanin p80 WD40 repeat-containing subunit B1 | (RefSeq) uncharacterized LOC105795008	--	--	--	Protein of unknown function (DUF789)	--	S	Function unknown	uncharacterized protein LOC103844492 [Brassica rapa]
BraA07g040170.3C.gene	1219	389	306	145	100	86	30.9115	9.44652	7.21386	3.35933	2.26966	2.13628	0.00348071	-2.69222	down	--	--	Cellular Component: integral component of membrane (GO:0016021);; Biological Process: transmembrane transport (GO:0055085);;	K24139|1.37e-274|brp:103832117|K24139 auxin efflux carrier family protein | (RefSeq) protein PIN-LIKES 3	--	[S]	Function unknown	Membrane transport protein	Protein PIN-LIKES 3 OS=Arabidopsis thaliana OX=3702 GN=PILS3 PE=2 SV=1	S	Function unknown	protein PIN-LIKES 3 [Brassica rapa]
BraA09g034260.3C.gene	228	210	178	99	79	116	4.19188	3.68921	3.04641	1.656	1.30445	2.11278	0.0010811	-1.18053	down	[C]	Energy production and conversion	Molecular Function: oxidoreductase activity (GO:0016491);; Molecular Function: FAD binding (GO:0071949);;	K22395|4.23e-166|adu:107481678|K22395 cinnamyl-alcohol dehydrogenase [EC:1.1.1.195] | (RefSeq) berberine bridge enzyme-like 13	Phenylpropanoid biosynthesis (ko00940)	--	--	Berberine and berberine like	Berberine bridge enzyme-like 12 OS=Arabidopsis thaliana OX=3702 GN=At1g30740 PE=2 SV=1	C	Energy production and conversion	berberine bridge enzyme-like 12 [Brassica rapa]
BraA03g026800.3C.gene	40	54	79	263	141	130	3.0452	4.00379	5.68839	18.7531	9.79759	9.98221	0.00158232	1.51231	up	--	--	Cellular Component: integral component of membrane (GO:0016021);;	--	--	--	--	--	Classical arabinogalactan protein 5 OS=Arabidopsis thaliana OX=3702 GN=AGP5 PE=2 SV=2	--	--	classical arabinogalactan protein 10 [Brassica rapa]
BraA07g035710.3C.gene	329	330	138	53	72	116	16.4832	15.8315	6.43166	2.42674	3.23216	5.74333	0.000635272	-1.83862	down	--	--	Molecular Function: DNA binding (GO:0003677);; Cellular Component: nucleus (GO:0005634);;	K09422|1.25e-137|brp:103831634|K09422 transcription factor MYB, plant | (RefSeq) MYBL2-1; myb-related protein 308	--	[K]	Transcription	Myb-like DNA-binding domain	Myb-related protein 308 OS=Antirrhinum majus OX=4151 GN=MYB308 PE=2 SV=1	--	--	myb-related protein 308 [Brassica rapa]
BraA06g011580.3C.gene	280	166	189	100	81	104	1.95338	1.10906	1.22412	0.635917	0.50318	0.716226	0.00124861	-1.27688	down	[T]	Signal transduction mechanisms	Molecular Function: ATP binding (GO:0005524);; Cellular Component: plasma membrane (GO:0005886);; Cellular Component: integral component of membrane (GO:0016021);; Molecular Function: ATPase activity (GO:0016887);; Molecular Function: ATPase-coupled transmembrane transporter activity (GO:0042626);; Biological Process: transmembrane transport (GO:0055085);;	K08712|4.39e-150|gsl:Gasu_29800|K08712 ATP-binding cassette, subfamily G (WHITE), member 2, SNQ2 | (RefSeq) ABC transporter, ATP-binding protein	ABC transporters (ko02010)	[Q]	Secondary metabolites biosynthesis, transport and catabolism	ABC-2 type transporter	ABC transporter G family member 40 OS=Arabidopsis thaliana OX=3702 GN=ABCG40 PE=1 SV=1	Q	Secondary metabolites biosynthesis, transport and catabolism	ABC transporter G family member 40 [Brassica rapa]
BraA01g015150.3C.gene	881	707	692	260	330	352	25.196	19.3382	18.3897	6.79259	8.44756	9.95065	7.30974e-09	-1.39244	down	[F]	Nucleotide transport and metabolism	Molecular Function: catalytic activity (GO:0003824);; Biological Process: nucleoside metabolic process (GO:0009116);;	K07870|1.18e-07|pxb:103958384|K07870 mitochondrial Rho GTPase 1 [EC:3.6.5.-] | (RefSeq) uncharacterized protein LOC103958384	--	--	--	Phosphorylase superfamily	--	F	Nucleotide transport and metabolism	bark storage protein A [Brassica rapa]
BraA06g009090.3C.gene	8	36	30	81	117	215	0.379909	1.61798	1.32231	3.54347	5.00136	10.142	0.000639777	2.41019	up	--	--	Molecular Function: DNA binding (GO:0003677);; Molecular Function: DNA-binding transcription factor activity (GO:0003700);; Cellular Component: nucleus (GO:0005634);;	K09286|3.63e-58|zju:107405053|K09286 EREBP-like factor | (RefSeq) dehydration-responsive element-binding protein 1A-like	--	--	--	AP2 domain	Dehydration-responsive element-binding protein 1F OS=Arabidopsis thaliana OX=3702 GN=DREB1F PE=2 SV=1	K	Transcription	dehydration-responsive element-binding protein 1F [Brassica rapa]
BraA09g040050.3C.gene	1279	1087	699	531	543	526	87.2802	71.012	44.3426	33.1426	33.1945	35.5201	0.000345473	-1.06873	down	--	--	Cellular Component: integral component of membrane (GO:0016021);;	--	--	--	--	--	--	S	Function unknown	probable pathogenesis-related protein ARB_02861 [Brassica rapa]
BraA02g013880.3C.gene	154	216	233	454	557	348	11.5345	15.4655	16.1952	31.1102	37.4282	25.7786	0.000110182	1.05138	up	--	--	Molecular Function: calcium ion binding (GO:0005509);;	K24345|4.97e-92|bna:106390102|K24345 calcium-binding protein KIC and related proteins | (RefSeq) calcium-binding protein PBP1-like	--	[ZD]	Cytoskeleton;; Cell cycle control, cell division, chromosome partitioning	EF-hand domain pair	Calcium-binding protein PBP1 OS=Arabidopsis thaliana OX=3702 GN=PBP1 PE=1 SV=1	--	--	calcium-binding protein PBP1-like [Brassica napus]
BraA06g039700.3C.gene	5251	5609	2776	2193	2352	2787	132.56	135.594	65.1576	50.6793	53.268	69.6153	0.00214016	-1.01778	down	[T]	Signal transduction mechanisms	Cellular Component: nucleus (GO:0005634);;	K20715|2.37e-57|cvr:CHLNCDRAFT_141214|K20715 phototropin [EC:2.7.11.1] | (RefSeq) hypothetical protein	--	--	--	PAS domain	Protein TWIN LOV 1 OS=Arabidopsis thaliana OX=3702 GN=TLP1 PE=1 SV=2	T	Signal transduction mechanisms	protein TWIN LOV 1 isoform X1 [Brassica rapa]
BraA01g015820.3C.gene	107	184	138	37	67	60	4.96324	8.17624	5.94565	1.54205	2.76573	2.72015	0.000991186	-1.49744	down	[P]	Inorganic ion transport and metabolism	Molecular Function: superoxide dismutase activity (GO:0004784);; Cellular Component: chloroplast nucleoid (GO:0042644);; Molecular Function: metal ion binding (GO:0046872);;	K04564|7.81e-158|bna:106442544|K04564 superoxide dismutase, Fe-Mn family [EC:1.15.1.1] | (RefSeq) superoxide dismutase [Fe] 1, chloroplastic	Peroxisome (ko04146)	[P]	Inorganic ion transport and metabolism	Iron/manganese superoxide dismutases, C-terminal domain	Superoxide dismutase [Fe] 1, chloroplastic OS=Arabidopsis thaliana OX=3702 GN=FSD1 PE=1 SV=4	P	Inorganic ion transport and metabolism	PREDICTED: superoxide dismutase [Fe] 1, chloroplastic [Brassica oleracea var. oleracea]
BraA09g029360.3C.gene	133	148	361	730	638	545	3.70054	3.96644	9.38999	18.7107	16.0244	15.1097	0.000194467	1.47671	up	--	--	Molecular Function: peroxidase activity (GO:0004601);; Cellular Component: extracellular region (GO:0005576);; Biological Process: response to oxidative stress (GO:0006979);; Molecular Function: heme binding (GO:0020037);; Biological Process: hydrogen peroxide catabolic process (GO:0042744);; Molecular Function: metal ion binding (GO:0046872);;	K00430|1.43e-255|brp:103838802|K00430 peroxidase [EC:1.11.1.7] | (RefSeq) peroxidase C2	Phenylpropanoid biosynthesis (ko00940)	--	--	Peroxidase	Peroxidase C2 OS=Armoracia rusticana OX=3704 GN=PRXC2 PE=3 SV=1	Q	Secondary metabolites biosynthesis, transport and catabolism	peroxidase C2 [Brassica rapa]
BraA09g000120.3C.gene	548	272	172	169	125	82	11.243	5.346	3.27373	3.16199	2.30225	1.66297	0.00455694	-1.55931	down	--	--	Molecular Function: UDP-glycosyltransferase activity (GO:0008194);; Cellular Component: intracellular membrane-bounded organelle (GO:0043231);;	K08237|0.0|brp:103836868|K08237 hydroquinone glucosyltransferase [EC:2.4.1.218] | (RefSeq) UDP-glycosyltransferase 72B1	--	[GC]	Carbohydrate transport and metabolism;; Energy production and conversion	UDP-glucoronosyl and UDP-glucosyl transferase	UDP-glycosyltransferase 72B1 OS=Arabidopsis thaliana OX=3702 GN=UGT72B1 PE=1 SV=1	--	--	UDP-glycosyltransferase 72B1 [Brassica rapa]
BraA08g000780.3C.gene	57	79	106	224	184	138	9.52824	12.6084	16.4127	34.3411	27.5903	22.847	0.0085972	1.05843	up	--	--	Cellular Component: integral component of membrane (GO:0016021);;	--	--	--	--	--	Arabinogalactan protein 12 OS=Arabidopsis thaliana OX=3702 GN=AGP12 PE=1 SV=1	--	--	arabinogalactan protein 21 [Brassica rapa]
BraA04g023520.3C.gene	110	165	113	439	350	358	1.60024	2.298	1.52329	5.86961	4.58189	5.16637	1.69562e-07	1.44513	up	--	--	Molecular Function: protein binding (GO:0005515);;	--	--	[R]	General function prediction only	Leucine rich repeat	Receptor like protein 24 OS=Arabidopsis thaliana OX=3702 GN=RLP24 PE=3 SV=1	S	Function unknown	receptor-like protein 41 [Brassica rapa]
BraA03g033890.3C.gene	82	77	88	213	163	218	2.09938	1.8663	2.07917	4.9883	3.73635	5.52221	0.000695851	1.15699	up	--	--	Molecular Function: adenyl-nucleotide exchange factor activity (GO:0000774);; Cellular Component: cytoplasm (GO:0005737);; Cellular Component: endoplasmic reticulum (GO:0005783);;	K09562|2.22e-244|brp:103859298|K09562 hsp70-interacting protein | (RefSeq) hsp70 nucleotide exchange factor fes1	Protein processing in endoplasmic reticulum (ko04141)	[O]	Posttranslational modification, protein turnover, chaperones	Armadillo/beta-catenin-like repeat	--	O	Posttranslational modification, protein turnover, chaperones	hsp70 nucleotide exchange factor fes1 [Brassica rapa]
BraA02g015410.3C.gene	23	13	15	167	126	157	1.06559	0.565681	0.635096	7.15129	5.29649	7.2766	2.33845e-12	3.02317	up	--	--	--	--	--	--	--	PAR1 protein	--	Z	Cytoskeleton	uncharacterized protein LOC103852106 [Brassica rapa]
BraA01g018200.3C.gene	2559	2659	1465	1080	1194	985	100.868	100.375	53.6851	38.9571	42.2033	38.4088	2.72754e-05	-1.17012	down	--	--	--	--	--	--	--	Aluminium induced protein	Stem-specific protein TSJT1 OS=Nicotiana tabacum OX=4097 GN=TSJT1 PE=2 SV=1	S	Function unknown	stem-specific protein TSJT1 [Brassica rapa]
BraA09g036020.3C.gene	470	415	345	204	191	135	7.94183	6.71987	5.4214	3.15324	2.8883	2.25669	5.58568e-07	-1.34912	down	--	--	Molecular Function: calcium ion binding (GO:0005509);; Cellular Component: integral component of membrane (GO:0016021);;	--	--	--	--	EF-hand domain pair	Sodium/calcium exchanger NCL OS=Arabidopsis thaliana OX=3702 GN=NCL PE=2 SV=1	S	Function unknown	sodium/calcium exchanger NCL isoform X1 [Brassica rapa]
BraA04g003380.3C.gene	12	29	28	78	59	122	0.338592	0.774512	0.732766	2.01959	1.49734	3.41332	0.00589679	1.82653	up	--	--	Molecular Function: hydrolase activity, hydrolyzing O-glycosyl compounds (GO:0004553);; Biological Process: carbohydrate metabolic process (GO:0005975);;	K19891|2.48e-58|crb:17886892|K19891 glucan endo-1,3-beta-glucosidase 1/2/3 [EC:3.2.1.39] | (RefSeq) glucan endo-1,3-beta-glucosidase 3	Starch and sucrose metabolism (ko00500)	--	--	Glycosyl hydrolases family 17	Glucan endo-1,3-beta-glucosidase OS=Brassica campestris OX=3711 GN=BGL PE=1 SV=1	G	Carbohydrate transport and metabolism	glucan endo-1,3-beta-glucosidase isoform X1 [Brassica rapa]
BraA07g015500.3C.gene	104	130	54	29	34	33	4.24539	5.06003	2.03875	1.06007	1.2384	1.32051	0.00283084	-1.71347	down	[J]	Translation, ribosomal structure and biogenesis	Molecular Function: mRNA binding (GO:0003729);;	K12741|1.06e-20|sind:105162503|K12741 heterogeneous nuclear ribonucleoprotein A1/A3 | (RefSeq) UBP1-associated protein 2C-like isoform X1	Spliceosome (ko03040)	[R]	General function prediction only	RNA recognition motif. (a.k.a. RRM, RBD, or RNP domain)	Probable RNA-binding protein ARP1 OS=Arabidopsis thaliana OX=3702 GN=ARP1 PE=2 SV=1	A	RNA processing and modification	RNA-binding protein 24 [Brassica rapa]
BraA02g020430.3C.gene	53	128	108	574	231	590	1.06513	2.49526	2.05358	10.728	4.22727	11.9338	4.71982e-06	2.18432	up	[G]	Carbohydrate transport and metabolism	Molecular Function: cellulase activity (GO:0008810);; Biological Process: cellulose catabolic process (GO:0030245);;	K01179|0.0|brp:103852724|K01179 endoglucanase [EC:3.2.1.4] | (RefSeq) endoglucanase 9 isoform X2	Starch and sucrose metabolism (ko00500)	--	--	Glycosyl hydrolase family 9	Endoglucanase 9 OS=Arabidopsis thaliana OX=3702 GN=CEL3 PE=1 SV=1	G	Carbohydrate transport and metabolism	endoglucanase 9 isoform X2 [Brassica rapa]
BraA02g042680.3C.gene	689	506	329	261	306	200	14.8456	10.4392	6.59429	5.14329	5.91025	4.26512	0.0026973	-1.13566	down	--	--	Molecular Function: protein dimerization activity (GO:0046983);;	--	--	--	--	Helix-loop-helix DNA-binding domain	Transcription factor BIM1 OS=Arabidopsis thaliana OX=3702 GN=BIM1 PE=1 SV=2	K	Transcription	transcription factor BIM1 [Brassica rapa]
BraA06g011080.3C.gene	60	51	103	209	202	147	5.95567	4.83494	9.55166	19.0922	18.0364	14.4425	0.00174445	1.26836	up	[O]	Posttranslational modification, protein turnover, chaperones	Molecular Function: ATP binding (GO:0005524);; Biological Process: protein folding (GO:0006457);;	K04078|1.46e-64|bna:106377058|K04078 chaperonin GroES | (RefSeq) 10 kDa chaperonin-like	--	[O]	Posttranslational modification, protein turnover, chaperones	Chaperonin 10 Kd subunit	10 kDa chaperonin OS=Brassica napus OX=3708 PE=3 SV=1	O	Posttranslational modification, protein turnover, chaperones	10 kDa chaperonin [Brassica rapa]
BraA01g039710.3C.gene	972	817	555	402	342	322	37.5687	30.2168	19.9252	14.2158	11.8332	12.3136	1.14228e-05	-1.27019	down	--	--	Molecular Function: DNA binding (GO:0003677);; Cellular Component: nucleus (GO:0005634);;	K08869|1.35e-35|cre:CHLREDRAFT_165812|K08869 aarF domain-containing kinase | (RefSeq) predicted protein	--	[O]	Posttranslational modification, protein turnover, chaperones	Myb-like DNA-binding domain	Transcription factor DIVARICATA OS=Antirrhinum majus OX=4151 GN=DIVARICATA PE=2 SV=1	K	Transcription	transcription factor DIVARICATA [Brassica rapa]
BraA01g015350.3C.gene	63	152	109	314	288	295	1.96921	4.54088	3.16464	8.97688	8.07606	9.13432	0.000345047	1.36074	up	--	--	Molecular Function: ATP transmembrane transporter activity (GO:0005347);; Biological Process: sulfate transport (GO:0008272);; Molecular Function: sulfate transmembrane transporter activity (GO:0015116);; Molecular Function: thiosulfate transmembrane transporter activity (GO:0015117);; Molecular Function: oxaloacetate transmembrane transporter activity (GO:0015131);; Molecular Function: malate tr…	K13577|1.08e-220|brp:103862285|K13577 solute carrier family 25 (mitochondrial dicarboxylate transporter), member 10 | (RefSeq) mitochondrial uncoupling protein 4	--	[C]	Energy production and conversion	Mitochondrial carrier protein	Mitochondrial uncoupling protein 4 OS=Arabidopsis thaliana OX=3702 GN=PUMP4 PE=2 SV=1	C	Energy production and conversion	mitochondrial uncoupling protein 4 [Brassica rapa]
BraA06g026760.3C.gene	212	230	180	372	425	554	5.45605	5.66732	4.31138	8.77679	9.84462	14.1643	0.00140897	1.01067	up	[T]	Signal transduction mechanisms	Molecular Function: hydrolase activity, acting on ester bonds (GO:0016788);;	--	--	[R]	General function prediction only	Calcineurin-like phosphoesterase	Probable inactive purple acid phosphatase 29 OS=Arabidopsis thaliana OX=3702 GN=PAP29 PE=2 SV=1	S	Function unknown	probable inactive purple acid phosphatase 29 [Brassica rapa]
BraA02g038520.3C.gene	56	123	57	252	305	179	2.95543	6.20356	2.76405	12.1676	14.4377	9.37151	0.00088411	1.50894	up	--	--	Molecular Function: calcium ion binding (GO:0005509);; Cellular Component: integral component of membrane (GO:0016021);;	K02183|5.57e-127|brp:103854166|K02183 calmodulin | (RefSeq) probable calcium-binding protein CML45	MAPK signaling pathway - plant (ko04016);; Phosphatidylinositol signaling system (ko04070);; Plant-pathogen interaction (ko04626)	[T]	Signal transduction mechanisms	EF-hand domain	Probable calcium-binding protein CML46 OS=Arabidopsis thaliana OX=3702 GN=CML46 PE=1 SV=1	T	Signal transduction mechanisms	probable calcium-binding protein CML45 [Brassica rapa]
NewGene_757	230	168	58	870	714	1515	7.61703	5.31767	1.77514	26.4892	21.2701	49.8518	0.00406517	2.64728	up	--	--	--	K12173|1.48e-45|gmx:100794341|K12173 BRCA1-A complex subunit BRE | (RefSeq) BRISC and BRCA1-A complex member 2	Homologous recombination (ko03440)	--	--	Thaumatin family	Pathogenesis-related protein 5 OS=Arabidopsis thaliana OX=3702 GN=At1g75040 PE=1 SV=1	T	Signal transduction mechanisms	pathogenesis-related protein 5 isoform X1 [Brassica rapa]
BraA02g007660.3C.gene	103	57	32	212	131	394	2.51995	1.32617	0.714368	4.74763	2.88226	9.56088	0.00597282	1.83328	up	--	--	--	--	--	--	--	D-mannose binding lectin	G-type lectin S-receptor-like serine/threonine-protein kinase At1g67520 OS=Arabidopsis thaliana OX=3702 GN=At1g67520 PE=2 SV=3	T	Signal transduction mechanisms	G-type lectin S-receptor-like serine/threonine-protein kinase At1g67520 [Brassica rapa]
BraA09g001360.3C.gene	110	86	46	36	19	20	2.01117	1.50767	0.783876	0.600191	0.312546	0.358878	0.00534945	-1.83146	down	--	--	Cellular Component: nucleoplasm (GO:0005654);; Cellular Component: cytosol (GO:0005829);; Molecular Function: polyubiquitin modification-dependent protein binding (GO:0031593);; Molecular Function: ubiquitin binding (GO:0043130);; Biological Process: proteasome-mediated ubiquitin-dependent protein catabolic process (GO:0043161);; Molecular Function: proteasome binding (GO:0070628);;	--	--	[OR]	Posttranslational modification, protein turnover, chaperones;; General function prediction only	Ubiquitin family	Ubiquitin domain-containing protein 7SL RNA2 OS=Arabidopsis thaliana OX=3702 GN=7SL2 PE=1 SV=1	O	Posttranslational modification, protein turnover, chaperones	uncharacterized protein LOC103836702 [Brassica rapa]
BraA05g004340.3C.gene	27	27	27	62	76	104	0.521183	0.484656	0.471936	1.09848	1.30963	1.98961	0.00813586	1.47624	up	[G]	Carbohydrate transport and metabolism	Biological Process: carbohydrate metabolic process (GO:0005975);; Molecular Function: beta-glucosidase activity (GO:0008422);; Biological Process: response to salt stress (GO:0009651);; Biological Process: glucosinolate catabolic process (GO:0019762);;	K01188|0.0|bna:106396850|K01188 beta-glucosidase [EC:3.2.1.21] | (RefSeq) beta-glucosidase 15-like	Cyanoamino acid metabolism (ko00460);; Starch and sucrose metabolism (ko00500);; Phenylpropanoid biosynthesis (ko00940)	[G]	Carbohydrate transport and metabolism	Glycosyl hydrolase family 1	Beta-glucosidase 15 OS=Arabidopsis thaliana OX=3702 GN=BGLU15 PE=1 SV=1	G	Carbohydrate transport and metabolism	beta-glucosidase 15 [Brassica rapa]
BraA04g023370.3C.gene	2547	1563	1506	699	974	942	19.7993	11.6306	10.8849	4.97357	6.79127	7.23993	4.47069e-05	-1.22915	down	--	--	Cellular Component: integral component of membrane (GO:0016021);; Molecular Function: cellulose synthase (UDP-forming) activity (GO:0016760);; Biological Process: cellulose biosynthetic process (GO:0030244);;	K10891|4.96e-141|tcc:18612304|K10891 fanconi anemia group D2 protein | (RefSeq) Fanconi anemia group D2 protein homolog	--	--	--	Cellulose synthase	Cellulose synthase-like protein B3 OS=Arabidopsis thaliana OX=3702 GN=CSLB3 PE=2 SV=1	G	Carbohydrate transport and metabolism	hypothetical protein F2Q70_00028268 [Brassica cretica]
BraA02g036660.3C.gene	933	933	450	236	238	319	32.7129	31.3239	14.6682	7.5753	7.48285	11.0628	5.29442e-06	-1.66746	down	--	--	Molecular Function: DNA binding (GO:0003677);; Molecular Function: DNA-binding transcription factor activity (GO:0003700);; Cellular Component: nucleus (GO:0005634);;	K13434|6.18e-15|jre:109002411|K13434 pathogenesis-related genes transcriptional activator PTI6 | (RefSeq) pathogenesis-related genes transcriptional activator PTI6-like	Plant-pathogen interaction (ko04626)	--	--	AP2 domain	Ethylene-responsive transcription factor ERF119 OS=Arabidopsis thaliana OX=3702 GN=ERF119 PE=1 SV=1	K	Transcription	ethylene-responsive transcription factor ERF119 isoform X3 [Brassica rapa]
BraA02g011840.3C.gene	2811	1880	1515	986	592	982	153.636	98.4242	77.0054	49.3112	29.0103	53.0835	4.12777e-05	-1.39902	down	[M]	Cell wall/membrane/envelope biogenesis	Biological Process: reproduction (GO:0000003);; Biological Process: response to acid chemical (GO:0001101);; Biological Process: developmental process involved in reproduction (GO:0003006);; Cellular Component: cellular_component (GO:0005575);; Cellular Component: intracellular (GO:0005622);; Cellular Component: obsolete cell (GO:0005623);; Cellular Component: cytoplasm (GO:0005737);; Cellular Co…	K03098|7.54e-135|bna:106388416|K03098 apolipoprotein D and lipocalin family protein | (RefSeq) temperature-induced lipocalin-1-like	--	[M]	Cell wall/membrane/envelope biogenesis	Lipocalin-like domain	Temperature-induced lipocalin-1 OS=Arabidopsis thaliana OX=3702 GN=TIL PE=1 SV=1	M	Cell wall/membrane/envelope biogenesis	temperature-induced lipocalin-1 [Brassica rapa]
BraA09g002920.3C.gene	22560	20654	12667	9742	11100	9336	1089.05	954.825	568.682	430.511	480.718	445.93	9.37001e-05	-1.02286	down	--	--	Molecular Function: transmembrane receptor protein serine/threonine kinase activity (GO:0004675);; Molecular Function: ATP binding (GO:0005524);; Cellular Component: plasma membrane (GO:0005886);; Biological Process: protein phosphorylation (GO:0006468);; Cellular Component: chloroplast (GO:0009507);; Cellular Component: integral component of membrane (GO:0016021);;	K12198|2.44e-21|sita:101765827|K12198 charged multivesicular body protein 5 | (RefSeq) vacuolar protein sorting-associated protein 60.1	Endocytosis (ko04144)	--	--	Light regulated protein Lir1	Light-regulated protein 1, chloroplastic OS=Arabidopsis thaliana OX=3702 GN=LIR1 PE=1 SV=1	T	Signal transduction mechanisms	light-regulated protein-like [Brassica rapa]
BraA06g034760.3C.gene	9553	7628	2402	1083	1148	1365	122.29	93.5101	28.5948	12.6867	13.1841	17.284	0.00124861	-2.58099	down	[G]	Carbohydrate transport and metabolism	Molecular Function: hydrolase activity, hydrolyzing O-glycosyl compounds (GO:0004553);; Molecular Function: xylan 1,4-beta-xylosidase activity (GO:0009044);; Cellular Component: plant-type cell wall (GO:0009505);; Biological Process: arabinan catabolic process (GO:0031222);; Biological Process: xylan catabolic process (GO:0045493);; Molecular Function: alpha-L-arabinofuranosidase activity (GO:004…	K15920|1.43e-315|cit:102619285|K15920 xylan 1,4-beta-xylosidase [EC:3.2.1.37] | (RefSeq) beta-xylosidase/alpha-L-arabinofuranosidase 2	Amino sugar and nucleotide sugar metabolism (ko00520)	--	--	Glycosyl hydrolase family 3 C-terminal domain	Beta-D-xylosidase 1 OS=Arabidopsis thaliana OX=3702 GN=BXL1 PE=1 SV=1	G	Carbohydrate transport and metabolism	beta-D-xylosidase 1 [Brassica rapa]
BraA03g017090.3C.gene	1156	903	918	488	489	450	14.7582	11.0409	10.8989	5.70194	5.59581	5.67773	7.7125e-10	-1.18561	down	--	--	Cellular Component: integral component of membrane (GO:0016021);;	K20283|1.29e-21|mcha:111008282|K20283 golgin subfamily A member 4 | (RefSeq) myosin-9	--	--	--	--	--	S	Function unknown	COP1-interactive protein 1 [Brassica rapa]
BraA01g014930.3C.gene	282	252	458	833	816	725	9.02947	7.72722	13.6649	24.4795	23.5188	23.044	6.12014e-06	1.15051	up	--	--	--	K02335|2.63e-13|ppp:112276692|K02335 DNA polymerase I [EC:2.7.7.7] | (RefSeq) DNA polymerase I B, chloroplastic/mitochondrial-like isoform X1	DNA replication (ko03030);; Base excision repair (ko03410);; Nucleotide excision repair (ko03420);; Homologous recombination (ko03440)	[Z]	Cytoskeleton	Protein of unknown function (DUF615)	--	Z	Cytoskeleton	UPF0307 protein Asuc_0809 [Brassica rapa]
BraA03g036600.3C.gene	363	131	98	35	45	55	22.825	7.86302	5.7047	1.97709	2.51286	3.38975	0.000335816	-2.27049	down	[QV]	Secondary metabolites biosynthesis, transport and catabolism;; Defense mechanisms	Molecular Function: monooxygenase activity (GO:0004497);; Molecular Function: iron ion binding (GO:0005506);; Molecular Function: oxidoreductase activity, acting on paired donors, with incorporation or reduction of molecular oxygen (GO:0016705);; Molecular Function: heme binding (GO:0020037);;	K07426|4.71e-65|cpep:111792333|K07426 cytochrome P450 family 4 subfamily B polypeptide 1 [EC:1.14.14.1] | (RefSeq) cytochrome P450 CYP72A219-like	--	[QI]	Secondary metabolites biosynthesis, transport and catabolism;; Lipid transport and metabolism	Cytochrome P450	Cytochrome P450 72A14 OS=Arabidopsis thaliana OX=3702 GN=CYP72A14 PE=2 SV=1	--	--	cytochrome P450 72A13-like [Brassica rapa]
BraA01g010090.3C.gene	90	107	126	239	389	264	8.62661	9.7949	11.2133	20.9366	33.51	25.0987	1.63659e-05	1.34837	up	--	--	Molecular Function: DNA binding (GO:0003677);; Cellular Component: nucleus (GO:0005634);; Biological Process: DNA replication (GO:0006260);; Biological Process: DNA repair (GO:0006281);; Biological Process: DNA recombination (GO:0006310);;	K10740|3.99e-67|bna:106375614|K10740 replication factor A3 | (RefSeq) replication protein A 14 kDa subunit B	DNA replication (ko03030);; Nucleotide excision repair (ko03420);; Mismatch repair (ko03430);; Homologous recombination (ko03440)	--	--	Replication factor A protein 3	Replication protein A 14 kDa subunit B OS=Arabidopsis thaliana OX=3702 GN=RPA3B PE=1 SV=1	S	Function unknown	replication protein A 14 kDa subunit B [Brassica rapa]
BraA08g014920.3C.gene	409	239	148	89	139	91	15.067	8.42783	5.06625	2.97944	4.60135	3.31752	0.00383604	-1.46764	down	[IQR]	Lipid transport and metabolism;; Secondary metabolites biosynthesis, transport and catabolism;; General function prediction only	Molecular Function: oxidoreductase activity (GO:0016491);;	K11147|3.00e-171|brp:103834242|K11147 dehydrogenase/reductase SDR family member 4 [EC:1.1.-.-] | (RefSeq) short-chain dehydrogenase/reductase SDRA	Peroxisome (ko04146)	[R]	General function prediction only	Enoyl-(Acyl carrier protein) reductase	Short-chain dehydrogenase/reductase SDRA OS=Arabidopsis thaliana OX=3702 GN=SDRA PE=1 SV=1	Q	Secondary metabolites biosynthesis, transport and catabolism	short-chain dehydrogenase/reductase SDRA [Brassica rapa]
BraA02g036930.3C.gene	148	185	241	499	435	446	3.06947	3.69542	4.67859	9.51914	8.14262	9.20126	1.92445e-06	1.15816	up	--	--	Molecular Function: nucleic acid binding (GO:0003676);; Molecular Function: tRNA (guanine-N2-)-methyltransferase activity (GO:0004809);; Cellular Component: cytoplasm (GO:0005737);; Molecular Function: methyltransferase activity (GO:0008168);;	K15430|0.0|bna:106402343|K15430 tRNA (guanine10-N2)-methyltransferase [EC:2.1.1.214] | (RefSeq) tRNA (guanine(10)-N2)-methyltransferase homolog isoform X1	--	[L]	Replication, recombination and repair	Putative RNA methylase family UPF0020	--	L	Replication, recombination and repair	tRNA (guanine(10)-N2)-methyltransferase homolog isoform X1 [Brassica rapa]
BraA03g016920.3C.gene	1562	1056	1703	625	1050	411	33.8905	21.9302	34.3598	12.4031	20.4266	8.81027	0.000824577	-1.18869	down	--	--	Molecular Function: UDP-glycosyltransferase activity (GO:0008194);;	K13691|6.18e-148|nto:104120845|K13691 pathogen-inducible salicylic acid glucosyltransferase [EC:2.4.1.-] | (RefSeq) UDP-glycosyltransferase 74G1-like	--	[GC]	Carbohydrate transport and metabolism;; Energy production and conversion	UDP-glucoronosyl and UDP-glucosyl transferase	UDP-glycosyltransferase 74D1 OS=Arabidopsis thaliana OX=3702 GN=UGT74D1 PE=1 SV=1	--	--	UDP-glycosyltransferase 74D1 [Brassica rapa]
BraA09g048100.3C.gene	7414	8369	3158	1483	1901	2451	95.8984	103.678	37.99	17.5572	22.0609	31.3627	0.00914839	-1.81868	down	[G]	Carbohydrate transport and metabolism	Molecular Function: raffinose alpha-galactosidase activity (GO:0052692);;	K06617|0.0|brp:103841656|K06617 raffinose synthase [EC:2.4.1.82] | (RefSeq) probable galactinol--sucrose galactosyltransferase 2	Galactose metabolism (ko00052)	--	--	Raffinose synthase or seed imbibition protein Sip1	Probable galactinol--sucrose galactosyltransferase 2 OS=Arabidopsis thaliana OX=3702 GN=RFS2 PE=2 SV=2	S	Function unknown	probable galactinol--sucrose galactosyltransferase 2 [Brassica rapa]
BraA10g022890.3C.gene	91	84	130	237	228	255	1.47444	1.315	1.97217	3.5382	3.33632	4.12485	0.00034365	1.1338	up	[R]	General function prediction only	Molecular Function: ATP binding (GO:0005524);; Cellular Component: mitochondrion (GO:0005739);; Biological Process: mitochondrion organization (GO:0007005);;	K17681|0.0|brp:103846277|K17681 ATPase family AAA domain-containing protein 3A/B | (RefSeq) ATPase family AAA domain-containing protein 3-B	--	[O]	Posttranslational modification, protein turnover, chaperones	Domain of unknown function (DUF3523)	--	O	Posttranslational modification, protein turnover, chaperones	ATPase family AAA domain-containing protein 3-B [Brassica rapa]
BraA01g011910.3C.gene	59	72	66	0	0	0	4.34855	5.12125	4.58618	0	0	0	7.94005e-09	-8.5958	down	--	--	Molecular Function: phosphatidylserine decarboxylase activity (GO:0004609);; Biological Process: phospholipid biosynthetic process (GO:0008654);; Cellular Component: integral component of membrane (GO:0016021);;	K01613|1.11e-22|bna:106437453|K01613 phosphatidylserine decarboxylase [EC:4.1.1.65] | (RefSeq) phosphatidylserine decarboxylase proenzyme 1, mitochondrial isoform X1	Glycerophospholipid metabolism (ko00564)	[I]	Lipid transport and metabolism	Phosphatidylserine decarboxylase	Phosphatidylserine decarboxylase proenzyme 1, mitochondrial OS=Arabidopsis thaliana OX=3702 GN=PSD1 PE=2 SV=1	I	Lipid transport and metabolism	hypothetical protein F2Q70_00015361 [Brassica cretica]
BraA09g053940.3C.gene	1241	687	577	406	457	467	28.5414	15.1277	12.3367	8.53883	9.42183	10.6257	0.00624395	-1.0461	down	--	--	--	--	--	--	--	--	--	--	--	uncharacterized protein LOC106368630 [Brassica napus]
BraA07g032110.3C.gene	474	544	563	1465	1289	964	30.3957	33.4646	33.5887	86.1341	74.2896	61.244	6.29541e-10	1.10988	up	--	--	Molecular Function: calcium ion binding (GO:0005509);;	K13448|3.00e-90|bna:106357116|K13448 calcium-binding protein CML | (RefSeq) calcium-binding protein CML24	Plant-pathogen interaction (ko04626)	[T]	Signal transduction mechanisms	EF hand	Probable calcium-binding protein CML23 OS=Arabidopsis thaliana OX=3702 GN=CML23 PE=2 SV=1	T	Signal transduction mechanisms	calcium-binding protein CML24 [Brassica rapa]
BraA02g043030.3C.gene	169	333	188	570	584	507	7.45803	14.055	7.72423	23.0157	23.1452	22.1594	0.000462187	1.14755	up	--	--	Molecular Function: DNA binding (GO:0003677);; Molecular Function: DNA-binding transcription factor activity (GO:0003700);; Cellular Component: nucleus (GO:0005634);;	K09286|3.11e-149|brp:103854952|K09286 EREBP-like factor | (RefSeq) ethylene-responsive transcription factor ERF104	--	--	--	AP2 domain	Ethylene-responsive transcription factor ERF104 OS=Arabidopsis thaliana OX=3702 GN=ERF104 PE=1 SV=1	K	Transcription	ethylene-responsive transcription factor ERF104 [Brassica rapa]
BraA09g026000.3C.gene	10431	6146	5257	2171	3139	2904	323.566	182.577	151.647	61.6507	87.3488	89.1282	0.00398168	-1.54185	down	--	--	Biological Process: response to acid chemical (GO:0001101);; Cellular Component: cellular_component (GO:0005575);; Cellular Component: intracellular (GO:0005622);; Cellular Component: obsolete cell (GO:0005623);; Cellular Component: nucleus (GO:0005634);; Cellular Component: cytoplasm (GO:0005737);; Biological Process: response to stress (GO:0006950);; Biological Process: biological_process (GO:0…	--	--	--	--	PAP_fibrillin	Probable plastid-lipid-associated protein 1, chloroplastic OS=Arabidopsis thaliana OX=3702 GN=PAP1 PE=1 SV=1	S	Function unknown	probable plastid-lipid-associated protein 1, chloroplastic [Brassica rapa]
BraA09g013990.3C.gene	38	44	39	97	113	83	0.798446	0.907797	0.77252	1.9078	2.17245	1.75526	0.0086282	1.15239	up	[I]	Lipid transport and metabolism	Cellular Component: integral component of membrane (GO:0016021);;	--	--	[R]	General function prediction only	alpha/beta hydrolase fold	Probable lysophospholipase BODYGUARD 1 OS=Arabidopsis thaliana OX=3702 GN=BDG1 PE=2 SV=1	S	Function unknown	probable lysophospholipase BODYGUARD 1 [Brassica rapa]
BraA06g016280.3C.gene	1219	1708	880	454	529	679	16.6959	22.4111	11.2094	5.69242	6.50046	9.19946	7.57715e-05	-1.30786	down	[G]	Carbohydrate transport and metabolism	Molecular Function: carbohydrate:proton symporter activity (GO:0005351);; Cellular Component: integral component of plasma membrane (GO:0005887);; Biological Process: glucose import (GO:0046323);;	K08150|2.56e-37|egr:104445619|K08150 MFS transporter, SP family, solute carrier family 2 (myo-inositol transporter), member 13 | (RefSeq) inositol transporter 4 isoform X2	--	[R]	General function prediction only	Sugar (and other) transporter	Monosaccharide-sensing protein 1 OS=Arabidopsis thaliana OX=3702 GN=MSSP1 PE=1 SV=2	U	Intracellular trafficking, secretion, and vesicular transport	monosaccharide-sensing protein 1 [Brassica rapa]
BraA04g020320.3C.gene	628	537	368	256	308	255	39.8116	32.6008	21.6854	14.8228	17.51	15.984	0.000929073	-1.03695	down	--	--	--	--	--	--	--	Senescence regulator	--	S	Function unknown	uncharacterized protein LOC103864886 [Brassica rapa]
BraA05g036630.3C.gene	251	200	130	102	70	85	16.1865	12.367	7.78722	5.98951	4.03444	5.38312	0.00302542	-1.30691	down	--	--	--	--	--	--	--	--	--	--	--	uncharacterized protein LOC103870496 [Brassica rapa]
BraA08g032010.3C.gene	74	77	88	211	201	116	2.27362	2.28646	2.5257	5.98797	5.58478	3.54748	0.00903129	1.01407	up	--	--	Molecular Function: hydrolase activity, hydrolyzing O-glycosyl compounds (GO:0004553);; Cellular Component: cell wall (GO:0005618);; Biological Process: xyloglucan metabolic process (GO:0010411);; Molecular Function: xyloglucan:xyloglucosyl transferase activity (GO:0016762);; Biological Process: cell wall biogenesis (GO:0042546);; Cellular Component: apoplast (GO:0048046);; Biological Process: ce…	K08235|3.17e-239|brp:103868088|K08235 xyloglucan:xyloglucosyl transferase [EC:2.4.1.207] | (RefSeq) probable xyloglucan endotransglucosylase/hydrolase protein 33	--	--	--	Glycosyl hydrolases family 16	Probable xyloglucan endotransglucosylase/hydrolase protein 33 OS=Arabidopsis thaliana OX=3702 GN=XTH33 PE=1 SV=2	G	Carbohydrate transport and metabolism	probable xyloglucan endotransglucosylase/hydrolase protein 33 [Brassica rapa]
BraA10g016870.3C.gene	123	143	211	500	430	247	2.52561	2.81149	4.0514	9.44865	7.96692	5.03937	0.00103458	1.18017	up	--	--	Molecular Function: protein kinase activity (GO:0004672);; Molecular Function: ATP binding (GO:0005524);; Biological Process: brassinosteroid mediated signaling pathway (GO:0009742);;	K14500|1.36e-253|egu:105059035|K14500 BR-signaling kinase [EC:2.7.11.1] | (RefSeq) probable serine/threonine-protein kinase At5g41260 isoform X1	Plant hormone signal transduction (ko04075)	--	--	Protein tyrosine and serine/threonine kinase	Serine/threonine-protein kinase BSK5 OS=Arabidopsis thaliana OX=3702 GN=BSK5 PE=1 SV=1	T	Signal transduction mechanisms	serine/threonine-protein kinase BSK5 [Brassica rapa]
BraA06g006960.3C.gene	1054	826	537	364	505	428	26.8766	20.1566	12.7196	8.48562	11.5412	10.7991	0.00294472	-1.03158	down	[EH]	Amino acid transport and metabolism;; Coenzyme transport and metabolism	Biological Process: branched-chain amino acid biosynthetic process (GO:0009082);; Molecular Function: L-leucine transaminase activity (GO:0052654);; Molecular Function: L-valine transaminase activity (GO:0052655);; Molecular Function: L-isoleucine transaminase activity (GO:0052656);;	K00826|9.81e-283|bna:106346218|K00826 branched-chain amino acid aminotransferase [EC:2.6.1.42] | (RefSeq) branched-chain-amino-acid aminotransferase 2, chloroplastic-like	Cysteine and methionine metabolism (ko00270);; Valine, leucine and isoleucine degradation (ko00280);; Valine, leucine and isoleucine biosynthesis (ko00290);; Pantothenate and CoA biosynthesis (ko00770);; Glucosinolate biosynthesis (ko00966);; 2-Oxocarboxylic acid metabolism (ko01210);; Biosynthesis of amino acids (ko01230)	[E]	Amino acid transport and metabolism	Amino-transferase class IV	Branched-chain-amino-acid aminotransferase 2, chloroplastic OS=Arabidopsis thaliana OX=3702 GN=BCAT2 PE=1 SV=1	E	Amino acid transport and metabolism	branched-chain-amino-acid aminotransferase 2, chloroplastic [Brassica rapa]
BraA01g041160.3C.gene	311	133	93	24	72	31	6.13612	2.50285	1.70145	0.424492	1.27466	0.606092	0.000935678	-2.2421	down	[V]	Defense mechanisms	Cellular Component: plasma membrane (GO:0005886);; Molecular Function: citrate transmembrane transporter activity (GO:0015137);; Molecular Function: antiporter activity (GO:0015297);; Cellular Component: integral component of membrane (GO:0016021);; Molecular Function: xenobiotic transmembrane transporter activity (GO:0042910);;	K20456|6.86e-99|smo:SELMODRAFT_417928|K20456 oxysterol-binding protein 1 | (RefSeq) hypothetical protein	--	[R]	General function prediction only	MatE	Protein DETOXIFICATION 43 OS=Arabidopsis thaliana OX=3702 GN=DTX43 PE=1 SV=1	V	Defense mechanisms	protein DETOXIFICATION 43 [Brassica rapa]
BraA09g026100.3C.gene	47	51	43	9	14	10	4.21569	4.42673	3.5655	0.731451	1.09425	0.831916	0.000776035	-2.2188	down	--	--	Cellular Component: mitochondrial inner membrane (GO:0005743);; Biological Process: mitochondrial pyruvate transmembrane transport (GO:0006850);;	K22139|8.02e-78|brp:103839861|K22139 mitochondrial pyruvate carrier 2 | (RefSeq) mitochondrial pyruvate carrier 3	--	[S]	Function unknown	Mitochondrial pyruvate carriers	Mitochondrial pyruvate carrier 3 OS=Arabidopsis thaliana OX=3702 GN=MPC3 PE=2 SV=1	C	Energy production and conversion	mitochondrial pyruvate carrier 3 [Brassica rapa]
BraA04g023360.3C.gene	6449	3297	3884	2048	2485	2339	83.9702	41.1023	47.0303	24.407	29.0285	30.1289	0.000217249	-1.11715	down	[N]	Cell motility	Cellular Component: integral component of membrane (GO:0016021);; Molecular Function: cellulose synthase (UDP-forming) activity (GO:0016760);; Biological Process: cellulose biosynthetic process (GO:0030244);; Biological Process: cell wall organization (GO:0071555);;	K10891|8.44e-160|tcc:18612304|K10891 fanconi anemia group D2 protein | (RefSeq) Fanconi anemia group D2 protein homolog	--	--	--	Cellulose synthase	Cellulose synthase-like protein B3 OS=Arabidopsis thaliana OX=3702 GN=CSLB3 PE=2 SV=1	G	Carbohydrate transport and metabolism	cellulose synthase-like protein B3 isoform X1 [Brassica rapa]
BraA01g042550.3C.gene	40	90	119	298	339	325	4.25444	9.34176	11.958	29.6352	33.023	34.8693	1.9804e-06	1.85359	up	--	--	--	--	--	[R]	General function prediction only	--	Defensin-like protein 205 OS=Arabidopsis thaliana OX=3702 GN=At3g05730 PE=3 SV=1	E	Amino acid transport and metabolism	defensin-like protein 205 [Brassica rapa]
BraA02g044390.3C.gene	470	526	435	1016	878	1240	13.3023	14.281	11.4464	26.3545	22.3271	34.7713	3.89338e-05	1.02322	up	[P]	Inorganic ion transport and metabolism	Biological Process: sulfur compound metabolic process (GO:0006790);; Molecular Function: 3'(2'),5'-bisphosphate nucleotidase activity (GO:0008441);; Biological Process: inositol phosphate dephosphorylation (GO:0046855);;	K15422|1.53e-246|brp:103855221|K15422 3'(2'), 5'-bisphosphate nucleotidase / inositol polyphosphate 1-phosphatase [EC:3.1.3.7 3.1.3.57] | (RefSeq) SAL2 phosphatase isoform X1	Inositol phosphate metabolism (ko00562);; Sulfur metabolism (ko00920);; Phosphatidylinositol signaling system (ko04070)	[FP]	Nucleotide transport and metabolism;; Inorganic ion transport and metabolism	Inositol monophosphatase family	SAL2 phosphatase OS=Arabidopsis thaliana OX=3702 GN=SAL2 PE=2 SV=1	--	--	SAL2 phosphatase isoform X2 [Brassica rapa]
BraA04g019450.3C.gene	359	508	434	1004	939	880	13.6028	18.4372	15.2967	34.843	31.9387	32.9985	7.00631e-08	1.0016	up	--	--	Cellular Component: integral component of membrane (GO:0016021);;	K04077|2.50e-16|cmos:111455859|K04077 chaperonin GroEL | (RefSeq) chaperonin CPN60-like 2, mitochondrial	RNA degradation (ko03018)	--	--	Late embryogenesis abundant protein	NDR1/HIN1-like protein 13 OS=Arabidopsis thaliana OX=3702 GN=NHL13 PE=2 SV=1	S	Function unknown	NDR1/HIN1-like protein 13 [Brassica rapa]
BraA01g043660.3C.gene	552	403	289	257	189	214	13.6899	9.55965	6.6434	5.81976	4.18577	5.24592	0.00533694	-1.04602	down	--	--	Cellular Component: cellular_component (GO:0005575);; Cellular Component: intracellular (GO:0005622);; Cellular Component: obsolete cell (GO:0005623);; Cellular Component: nucleus (GO:0005634);; Cellular Component: organelle (GO:0043226);; Cellular Component: membrane-bounded organelle (GO:0043227);; Cellular Component: intracellular organelle (GO:0043229);; Cellular Component: intracellular memb…	K08332|2.79e-76|cpap:110808679|K08332 vacuolar protein 8 | (RefSeq) LOW QUALITY PROTEIN: U-box domain-containing protein 3	--	[S]	Function unknown	Armadillo/beta-catenin-like repeat	--	S	Function unknown	U-box domain-containing protein 7 [Brassica rapa]
BraA03g053670.3C.gene	416	297	204	120	106	117	13.663	9.32014	6.21242	3.61117	3.10359	3.78471	4.96709e-05	-1.54993	down	--	--	Molecular Function: DNA binding (GO:0003677);; Cellular Component: nucleus (GO:0005634);; Biological Process: regulation of transcription, DNA-templated (GO:0006355);;	K00521|1.09e-53|cmos:111447866|K00521 ferric-chelate reductase [EC:1.16.1.7] | (RefSeq) ferric reduction oxidase 7, chloroplastic-like	--	--	--	No apical meristem (NAM) protein	NAC domain-containing protein 72 OS=Arabidopsis thaliana OX=3702 GN=NAC072 PE=2 SV=1	K	Transcription	NAC domain-containing protein 72 [Brassica rapa]
BraA08g013040.3C.gene	156	143	95	441	364	376	2.29684	2.01991	1.29996	5.95158	4.81582	5.49317	1.31011e-06	1.45629	up	--	--	Cellular Component: integral component of membrane (GO:0016021);;	--	--	[R]	General function prediction only	Leucine rich repeat	Receptor-like protein 31 OS=Arabidopsis thaliana OX=3702 GN=RLP31 PE=2 SV=1	L	Replication, recombination and repair	unnamed protein product [Brassica oleracea]
BraA03g021430.3C.gene	14	50	29	93	97	114	0.616689	2.20347	1.24087	3.94784	4.024	5.21398	0.00967308	1.60722	up	--	--	--	K14496|3.69e-147|bna:106438029|K14496 abscisic acid receptor PYR/PYL family | (RefSeq) abscisic acid receptor PYL6	MAPK signaling pathway - plant (ko04016);; Plant hormone signal transduction (ko04075)	--	--	Polyketide cyclase / dehydrase and lipid transport	Abscisic acid receptor PYL6 OS=Arabidopsis thaliana OX=3702 GN=PYL6 PE=1 SV=1	S	Function unknown	abscisic acid receptor PYL6 [Brassica rapa]
BraA01g036690.3C.gene	1798	2586	263	53	104	232	70.0381	96.4635	9.49958	1.86432	3.61192	8.92063	0.00967308	-3.67915	down	--	--	--	--	--	--	--	Aluminium induced protein	Stem-specific protein TSJT1 OS=Nicotiana tabacum OX=4097 GN=TSJT1 PE=2 SV=1	S	Function unknown	stem-specific protein TSJT1 [Brassica rapa]
BraA01g015060.3C.gene	47	59	53	312	269	283	4.18996	4.99762	4.41143	25.63	21.6915	25.19	4.66846e-19	2.32737	up	--	--	--	--	--	--	--	--	--	--	--	uncharacterized protein LOC103861940 [Brassica rapa]
BraA03g050560.3C.gene	227	156	136	69	93	67	6.25962	4.10641	3.48642	1.74169	2.28537	1.80569	0.00137145	-1.31537	down	[Q]	Secondary metabolites biosynthesis, transport and catabolism	Molecular Function: metal ion binding (GO:0046872);; Molecular Function: dioxygenase activity (GO:0051213);;	K05277|3.00e-262|brp:103861341|K05277 anthocyanidin synthase [EC:1.14.20.4] | (RefSeq) leucoanthocyanidin dioxygenase isoform X1	Flavonoid biosynthesis (ko00941)	[QR]	Secondary metabolites biosynthesis, transport and catabolism;; General function prediction only	non-haem dioxygenase in morphine synthesis N-terminal	Leucoanthocyanidin dioxygenase OS=Arabidopsis thaliana OX=3702 GN=LDOX PE=1 SV=1	Q	Secondary metabolites biosynthesis, transport and catabolism	leucoanthocyanidin dioxygenase isoform X2 [Brassica rapa]
BraA07g036810.3C.gene	133	312	273	672	516	725	7.39862	16.6839	14.1452	34.3713	25.858	40.0705	0.00034175	1.31855	up	[O]	Posttranslational modification, protein turnover, chaperones	Molecular Function: molecular_function (GO:0003674);; Molecular Function: binding (GO:0005488);; Molecular Function: protein binding (GO:0005515);; Molecular Function: chaperone binding (GO:0051087);;	K09510|2.33e-13|crb:17895419|K09510 DnaJ homolog subfamily B member 4 | (RefSeq) dnaJ homolog subfamily B member 1 isoform X1	--	[O]	Posttranslational modification, protein turnover, chaperones	DnaJ domain	DnaJ protein ERDJ3B OS=Oryza sativa subsp. japonica OX=39947 GN=ERDJ3B PE=1 SV=1	O	Posttranslational modification, protein turnover, chaperones	chaperone protein DnaJ isoform X2 [Brassica rapa]
BraA08g034420.3C.gene	37	30	47	106	76	167	0.349992	0.274834	0.416069	0.933516	0.659626	1.59409	0.00733194	1.52651	up	--	--	Molecular Function: NEDD8 activating enzyme activity (GO:0019781);; Biological Process: protein neddylation (GO:0045116);;	K04532|0.0|brp:103836538|K04532 amyloid beta precursor protein binding protein 1 | (RefSeq) NEDD8-activating enzyme E1 regulatory subunit AXR1 isoform X1	--	[O]	Posttranslational modification, protein turnover, chaperones	ThiF family	NEDD8-activating enzyme E1 regulatory subunit AXR1 OS=Arabidopsis thaliana OX=3702 GN=AXR1 PE=1 SV=1	O	Posttranslational modification, protein turnover, chaperones	NEDD8-activating enzyme E1 regulatory subunit AXR1 isoform X1 [Brassica rapa]
BraA03g011150.3C.gene	233	221	117	50	82	91	9.4487	8.60965	4.41069	1.86222	2.9762	3.65588	0.00297888	-1.47838	down	--	--	Cellular Component: nucleus (GO:0005634);; Biological Process: regulation of transcription, DNA-templated (GO:0006355);; Molecular Function: sequence-specific DNA binding (GO:0043565);;	K09422|3.30e-153|boe:106331608|K09422 transcription factor MYB, plant | (RefSeq) transcription factor MYB59 isoform X1	--	[K]	Transcription	Myb-like DNA-binding domain	Transcription factor MYB59 OS=Arabidopsis thaliana OX=3702 GN=MYB59 PE=2 SV=2	--	--	transcription factor MYB59 isoform X1 [Brassica rapa]
BraA10g031210.3C.gene	1047	1214	547	394	426	521	34.7664	38.5898	16.8637	11.9694	12.673	17.1001	0.00157624	-1.18757	down	--	--	Biological Process: response to oomycetes (GO:0002239);; Cellular Component: cellular_component (GO:0005575);; Cellular Component: cell-cell junction (GO:0005911);; Biological Process: biological_process (GO:0008150);; Cellular Component: plasmodesma (GO:0009506);; Biological Process: response to external stimulus (GO:0009605);; Biological Process: response to biotic stimulus (GO:0009607);; Cellu…	K00020|2.03e-15|mtr:MTR_8g088900|K00020 3-hydroxyisobutyrate dehydrogenase [EC:1.1.1.31] | (RefSeq) 6-phosphogluconate dehydrogenase-like protein	Valine, leucine and isoleucine degradation (ko00280)	--	--	Phosphate-induced protein 1 conserved region	Protein EXORDIUM-like 2 OS=Arabidopsis thaliana OX=3702 GN=EXL2 PE=2 SV=1	L	Replication, recombination and repair	protein EXORDIUM-like 4 [Brassica rapa]
BraA01g036620.3C.gene	38	25	38	96	91	130	1.89726	1.17076	1.73661	4.37934	4.06547	6.41179	0.00176793	1.54586	up	--	--	Cellular Component: nucleus (GO:0005634);; Biological Process: regulation of transcription, DNA-templated (GO:0006355);; Biological Process: auxin-activated signaling pathway (GO:0009734);;	K14484|2.64e-144|brp:103840684|K14484 auxin-responsive protein IAA | (RefSeq) auxin-responsive protein IAA19	Plant hormone signal transduction (ko04075)	--	--	AUX/IAA family	Auxin-responsive protein IAA19 OS=Arabidopsis thaliana OX=3702 GN=IAA19 PE=1 SV=2	K	Transcription	auxin-responsive protein IAA19 [Brassica rapa]
BraA09g002820.3C.gene	795	688	392	137	190	215	15.6919	13.0068	7.19477	2.46266	3.36204	4.18909	8.27697e-08	-1.91419	down	[QV]	Secondary metabolites biosynthesis, transport and catabolism;; Defense mechanisms	Molecular Function: iron ion binding (GO:0005506);; Cellular Component: membrane (GO:0016020);; Molecular Function: oxidoreductase activity, acting on paired donors, with incorporation or reduction of molecular oxygen, NAD(P)H as one donor, and incorporation of one atom of oxygen (GO:0016709);; Molecular Function: heme binding (GO:0020037);;	K20617|7.77e-192|eus:EUTSA_v10010307mg|K20617 cytochrome P450 family 71 subfamily A | (RefSeq) hypothetical protein	--	[Q]	Secondary metabolites biosynthesis, transport and catabolism	Cytochrome P450	Cytochrome P450 71B4 OS=Arabidopsis thaliana OX=3702 GN=CYP71B4 PE=2 SV=2	Q	Secondary metabolites biosynthesis, transport and catabolism	cytochrome P450 71B4 [Brassica rapa]
BraA03g010510.3C.gene	39	41	32	137	100	79	0.813445	0.818631	0.634471	2.65982	1.90871	1.64982	0.0041334	1.36584	up	--	--	Biological Process: protein glycosylation (GO:0006486);; Biological Process: glucuronoxylan biosynthetic process (GO:0010417);; Cellular Component: integral component of membrane (GO:0016021);; Molecular Function: transferase activity, transferring glycosyl groups (GO:0016757);;	K20889|9.79e-301|brp:103856541|K20889 probable glucuronoxylan glucuronosyltransferase IRX7 [EC:2.4.1.-] | (RefSeq) probable glucuronoxylan glucuronosyltransferase F8H	--	[GMW]	Carbohydrate transport and metabolism;; Cell wall/membrane/envelope biogenesis;; Extracellular structures	Exostosin family	Probable glucuronoxylan glucuronosyltransferase F8H OS=Arabidopsis thaliana OX=3702 GN=F8H PE=2 SV=1	--	--	probable glucuronoxylan glucuronosyltransferase F8H [Brassica rapa]
BraA07g027960.3C.gene	21	11	5	367	207	427	1.85333	0.888012	0.415431	30.4705	16.8151	38.3095	1.29424e-20	4.64125	up	--	--	Cellular Component: extracellular region (GO:0005576);; Biological Process: defense response (GO:0006952);;	--	--	--	--	Thaumatin family	Pathogenesis-related protein 5 OS=Arabidopsis thaliana OX=3702 GN=At1g75040 PE=1 SV=1	T	Signal transduction mechanisms	pathogenesis-related protein 5 [Brassica rapa]
BraA10g032260.3C.gene	1490	1457	812	631	541	720	12.0631	11.2987	6.11172	4.67765	3.92397	5.76569	0.000836466	-1.1121	down	[R]	General function prediction only	Molecular Function: triglyceride lipase activity (GO:0004806);; Molecular Function: ligand-gated ion channel activity (GO:0015276);; Cellular Component: integral component of membrane (GO:0016021);; Biological Process: lipid catabolic process (GO:0016042);;	K14674|0.0|brp:103847336|K14674 TAG lipase / steryl ester hydrolase / phospholipase A2 / LPA acyltransferase [EC:3.1.1.3 3.1.1.13 3.1.1.4 2.3.1.51] | (RefSeq) triacylglycerol lipase SDP1	Steroid biosynthesis (ko00100);; Glycerolipid metabolism (ko00561);; Glycerophospholipid metabolism (ko00564);; Ether lipid metabolism (ko00565);; Arachidonic acid metabolism (ko00590);; Linoleic acid metabolism (ko00591);; alpha-Linolenic acid metabolism (ko00592)	[R]	General function prediction only	Domain of unknown function (DUF3336)	Triacylglycerol lipase SDP1 OS=Arabidopsis thaliana OX=3702 GN=SDP1 PE=1 SV=1	I	Lipid transport and metabolism	unnamed protein product [Brassica rapa]
BraA03g015450.3C.gene	166	183	270	44	57	48	14.7949	15.5687	22.3652	3.5386	4.50398	4.2199	4.16621e-11	-2.16266	down	--	--	Biological Process: lipid transport (GO:0006869);; Molecular Function: lipid binding (GO:0008289);; Cellular Component: membrane (GO:0016020);;	--	--	--	--	Protease inhibitor/seed storage/LTP family	Non-specific lipid-transfer protein 3 OS=Arabidopsis thaliana OX=3702 GN=LTP3 PE=3 SV=1	T	Signal transduction mechanisms	BnaA03g13140D [Brassica napus]
BraA09g005270.3C.gene	989	827	575	324	426	429	14.7157	11.7727	7.95159	4.40749	5.67467	6.30585	0.000254947	-1.14518	down	--	--	Biological Process: ubiquitin-dependent protein catabolic process (GO:0006511);; Cellular Component: SCF ubiquitin ligase complex (GO:0019005);; Biological Process: SCF-dependent proteasomal ubiquitin-dependent protein catabolic process (GO:0031146);;	K10268|5.45e-271|brp:103837159|K10268 F-box and leucine-rich repeat protein 2/20 | (RefSeq) F-box/LRR-repeat protein 3	--	[R]	General function prediction only	Leucine Rich repeat	F-box/LRR-repeat protein 3 OS=Arabidopsis thaliana OX=3702 GN=FBL3 PE=2 SV=1	S	Function unknown	F-box/LRR-repeat protein 3 [Brassica rapa]
BraA08g032060.3C.gene	190	229	218	691	480	490	7.43807	8.57871	7.94777	24.8306	16.8931	19.0409	7.25155e-08	1.26452	up	[T]	Signal transduction mechanisms	Biological Process: phosphorelay signal transduction system (GO:0000160);;	K14492|7.63e-141|bna:106362416|K14492 two-component response regulator ARR-A family | (RefSeq) two-component response regulator ARR4-like	Plant hormone signal transduction (ko04075)	[K]	Transcription	Response regulator receiver domain	Two-component response regulator ARR4 OS=Arabidopsis thaliana OX=3702 GN=ARR4 PE=1 SV=1	K	Transcription	two-component response regulator ARR4 [Brassica rapa]
BraA10g020900.3C.gene	43	28	43	100	85	112	0.375728	0.236744	0.35315	0.812016	0.671081	0.97656	0.00976444	1.2725	up	[DZ]	Cell cycle control, cell division, chromosome partitioning;; Cytoskeleton	Molecular Function: metal ion binding (GO:0046872);;	K10615|5.12e-50|ppp:112282946|K10615 E3 ubiquitin-protein ligase HERC4 [EC:2.3.2.26] | (RefSeq) probable E3 ubiquitin-protein ligase HERC4 isoform X1	Ubiquitin mediated proteolysis (ko04120)	--	--	Regulator of chromosome condensation (RCC1) repeat	PH, RCC1 and FYVE domains-containing protein 1 OS=Arabidopsis thaliana OX=3702 GN=PRAF1 PE=1 SV=1	T	Signal transduction mechanisms	LOW QUALITY PROTEIN: PH, RCC1 and FYVE domains-containing protein 1 [Brassica rapa]
BraA02g010170.3C.gene	46	25	84	176	151	140	1.14714	0.59462	1.96542	4.06268	3.41702	3.49383	0.00516784	1.48631	up	[P]	Inorganic ion transport and metabolism	Molecular Function: ATP binding (GO:0005524);; Cellular Component: mitochondrial matrix (GO:0005759);; Molecular Function: ATPase activity (GO:0016887);;	K01551|3.62e-271|brp:103851486|K01551 arsenite/tail-anchored protein-transporting ATPase [EC:7.3.2.7 7.3.-.-] | (RefSeq) ATPase ARSA1	--	[P]	Inorganic ion transport and metabolism	Anion-transporting ATPase	ATPase GET3C OS=Arabidopsis thaliana OX=3702 GN=GET3C PE=2 SV=1	P	Inorganic ion transport and metabolism	ATPase ARSA1 [Brassica rapa]
BraA09g064310.3C.gene	26	31	30	73	105	64	1.67926	1.94303	1.80351	4.36854	6.20866	4.15029	0.00885449	1.35079	up	--	--	Cellular Component: cytoplasm (GO:0005737);;	--	--	[S]	Function unknown	Eukaryotic protein of unknown function (DUF842)	--	S	Function unknown	protein FAM136A [Brassica rapa]
BraA02g011810.3C.gene	51	77	75	168	167	117	0.807867	1.16582	1.09569	2.42694	2.3719	1.83129	0.00767967	1.03418	up	[TK]	Signal transduction mechanisms;; Transcription	Biological Process: phosphorelay signal transduction system (GO:0000160);; Molecular Function: DNA binding (GO:0003677);; Molecular Function: DNA-binding transcription factor activity (GO:0003700);; Cellular Component: nucleus (GO:0005634);;	K14491|0.0|brp:103851662|K14491 two-component response regulator ARR-B family | (RefSeq) two-component response regulator ARR18	Plant hormone signal transduction (ko04075)	[K]	Transcription	Response regulator receiver domain	Two-component response regulator ARR18 OS=Arabidopsis thaliana OX=3702 GN=ARR18 PE=2 SV=2	K	Transcription	two-component response regulator ARR18 [Brassica rapa]
BraA02g011080.3C.gene	1168	1765	2424	846	845	971	103.129	149.331	199.165	68.4086	66.9629	84.8523	5.34473e-05	-1.1033	down	--	--	Biological Process: lipid transport (GO:0006869);; Molecular Function: lipid binding (GO:0008289);;	--	--	--	--	Protease inhibitor/seed storage/LTP family	Non-specific lipid-transfer protein 4 OS=Arabidopsis thaliana OX=3702 GN=LTP4 PE=3 SV=1	T	Signal transduction mechanisms	unnamed protein product [Brassica rapa]
BraA05g009050.3C.gene	573	350	411	296	250	144	10.1477	5.93199	6.76419	4.7914	3.97674	2.51868	0.00339554	-1.09418	down	--	--	Molecular Function: ADP binding (GO:0043531);;	K13457|4.31e-55|nnu:104607772|K13457 disease resistance protein RPM1 | (RefSeq) disease resistance protein RPM1-like	Plant-pathogen interaction (ko04626)	[T]	Signal transduction mechanisms	NB-ARC domain	Probable disease resistance RPP8-like protein 4 OS=Arabidopsis thaliana OX=3702 GN=RPP8L4 PE=2 SV=1	T	Signal transduction mechanisms	probable disease resistance RPP8-like protein 4 [Brassica rapa]
BraA02g026450.3C.gene	46	49	33	215	101	224	0.807235	0.827944	0.542067	3.49647	1.60853	3.93427	8.08949e-05	1.9695	up	[QV]	Secondary metabolites biosynthesis, transport and catabolism;; Defense mechanisms	Molecular Function: monooxygenase activity (GO:0004497);; Molecular Function: iron ion binding (GO:0005506);; Molecular Function: oxidoreductase activity, acting on paired donors, with incorporation or reduction of molecular oxygen (GO:0016705);; Molecular Function: heme binding (GO:0020037);;	K15398|0.0|brp:103853312|K15398 fatty acid omega-hydroxylase [EC:1.14.-.-] | (RefSeq) cytochrome P450 86A2	Cutin, suberine and wax biosynthesis (ko00073)	[QI]	Secondary metabolites biosynthesis, transport and catabolism;; Lipid transport and metabolism	Cytochrome P450	Cytochrome P450 86A2 OS=Arabidopsis thaliana OX=3702 GN=CYP86A2 PE=1 SV=1	Q	Secondary metabolites biosynthesis, transport and catabolism	cytochrome P450 86A2 [Brassica rapa]
BraA04g001840.3C.gene	17	13	22	89	44	64	0.623172	0.454572	0.744566	2.99173	1.43193	2.31781	0.00542534	1.81204	up	[G]	Carbohydrate transport and metabolism	--	--	--	[G]	Carbohydrate transport and metabolism	Histidine phosphatase superfamily (branch 1)	--	G	Carbohydrate transport and metabolism	uncharacterized protein LOC103862883 [Brassica rapa]
BraA04g021340.3C.gene	310	307	278	585	774	598	8.30882	7.88335	6.91677	14.3517	18.6035	15.8658	1.86873e-06	1.00478	up	[T]	Signal transduction mechanisms	Molecular Function: protein serine/threonine phosphatase activity (GO:0004722);; Molecular Function: metal ion binding (GO:0046872);;	K17506|4.00e-261|bna:106348417|K17506 protein phosphatase 1L [EC:3.1.3.16] | (RefSeq) probable protein phosphatase 2C 25	--	[T]	Signal transduction mechanisms	Protein phosphatase 2C	Probable protein phosphatase 2C 25 OS=Arabidopsis thaliana OX=3702 GN=At2g30020 PE=1 SV=1	T	Signal transduction mechanisms	probable protein phosphatase 2C 25 [Brassica rapa]
BraA09g029920.3C.gene	1871	1339	883	694	809	737	52.5992	36.0404	23.0682	17.8391	20.3916	20.4878	0.00303728	-1.00471	down	--	--	Molecular Function: molecular_function (GO:0003674);; Molecular Function: catalytic activity (GO:0003824);; Molecular Function: choline kinase activity (GO:0004103);; Molecular Function: ethanolamine kinase activity (GO:0004305);; Cellular Component: cellular_component (GO:0005575);; Cellular Component: intracellular (GO:0005622);; Cellular Component: obsolete cell (GO:0005623);; Cellular Compone…	K14156|1.91e-264|brp:103838849|K14156 choline/ethanolamine kinase [EC:2.7.1.32 2.7.1.82] | (RefSeq) probable choline kinase 3	Glycerophospholipid metabolism (ko00564)	[M]	Cell wall/membrane/envelope biogenesis	Choline/ethanolamine kinase	Probable choline kinase 3 OS=Arabidopsis thaliana OX=3702 GN=At4g09760 PE=2 SV=1	M	Cell wall/membrane/envelope biogenesis	probable choline kinase 3 [Brassica rapa]
BraA09g007260.3C.gene	1176	878	503	481	505	406	47.4944	33.9483	18.8666	17.7813	18.2944	16.1999	0.00738892	-1.01947	down	--	--	--	--	--	--	--	Protein of unknown function (DUF1442)	--	S	Function unknown	uncharacterized protein LOC103837409 [Brassica rapa]
BraA08g024940.3C.gene	19	32	80	180	155	114	0.908439	1.45657	3.60296	7.95653	6.73622	5.46366	0.00597282	1.6788	up	[J]	Translation, ribosomal structure and biogenesis	Biological Process: cytoplasmic translation (GO:0002181);; Molecular Function: structural constituent of ribosome (GO:0003735);; Cellular Component: cytosolic large ribosomal subunit (GO:0022625);;	K02880|4.45e-117|boe:106332776|K02880 large subunit ribosomal protein L17e | (RefSeq) 60S ribosomal protein L17-1-like	Ribosome (ko03010)	[J]	Translation, ribosomal structure and biogenesis	Ribosomal protein L22p/L17e	60S ribosomal protein L17-1 OS=Arabidopsis thaliana OX=3702 GN=RPL17A PE=2 SV=1	J	Translation, ribosomal structure and biogenesis	PREDICTED: 60S ribosomal protein L17-1-like [Brassica oleracea var. oleracea]
BraA03g036590.3C.gene	263	139	108	52	54	56	14.6983	7.44019	5.58771	2.61476	2.69427	3.07829	0.000392114	-1.79042	down	[QV]	Secondary metabolites biosynthesis, transport and catabolism;; Defense mechanisms	Molecular Function: monooxygenase activity (GO:0004497);; Molecular Function: iron ion binding (GO:0005506);; Molecular Function: oxidoreductase activity, acting on paired donors, with incorporation or reduction of molecular oxygen (GO:0016705);; Molecular Function: heme binding (GO:0020037);;	K23808|3.22e-26|mtr:MTR_2g023680|K23808 cytochrome P450 family 72 subfamily A polypeptide 67 [EC:1.14.13.-] | (RefSeq) cytochrome P450 family monooxygenase	--	[QI]	Secondary metabolites biosynthesis, transport and catabolism;; Lipid transport and metabolism	Cytochrome P450	Cytochrome P450 72A13 OS=Arabidopsis thaliana OX=3702 GN=CYP72A13 PE=2 SV=1	--	--	cytochrome P450 72A13-like [Brassica rapa]
BraA10g021960.3C.gene	710	465	394	173	192	211	25.3489	15.8942	13.0665	5.6412	6.13767	7.45293	1.31011e-06	-1.57181	down	--	--	Cellular Component: integral component of membrane (GO:0016021);;	--	--	--	--	--	--	--	--	uncharacterized protein LOC103845864 isoform X1 [Brassica rapa]
BraA03g028360.3C.gene	106	189	143	500	456	388	5.82969	10.0052	7.34476	25.2732	22.6087	21.1931	2.38766e-08	1.4994	up	--	--	Molecular Function: protein binding (GO:0005515);;	--	--	--	--	F-box domain	F-box protein At4g05010 OS=Arabidopsis thaliana OX=3702 GN=At4g05010 PE=2 SV=1	S	Function unknown	F-box protein At4g05010 [Brassica rapa]
BraA06g000610.3C.gene	148	147	260	538	497	272	24.3192	23.0842	39.8754	81.1828	73.4622	44.2459	0.00312581	1.11367	up	--	--	--	--	--	--	--	--	Arabinogalactan protein 12 OS=Arabidopsis thaliana OX=3702 GN=AGP12 PE=1 SV=1	--	--	arabinogalactan protein 21 [Brassica rapa]
BraA05g003150.3C.gene	113	96	42	34	17	28	2.17076	1.77204	0.743617	0.601401	0.281832	0.524185	0.00888102	-1.79938	down	[C]	Energy production and conversion	Molecular Function: citrate (Si)-synthase activity (GO:0004108);; Cellular Component: mitochondrial matrix (GO:0005759);; Biological Process: carbohydrate metabolic process (GO:0005975);; Biological Process: tricarboxylic acid cycle (GO:0006099);;	K01647|0.0|bna:106377405|K01647 citrate synthase [EC:2.3.3.1] | (RefSeq) citrate synthase 3, peroxisomal-like	Citrate cycle (TCA cycle) (ko00020);; Glyoxylate and dicarboxylate metabolism (ko00630);; Carbon metabolism (ko01200);; 2-Oxocarboxylic acid metabolism (ko01210);; Biosynthesis of amino acids (ko01230)	[C]	Energy production and conversion	Citrate synthase, C-terminal domain	Citrate synthase 3, peroxisomal OS=Arabidopsis thaliana OX=3702 GN=CSY3 PE=2 SV=1	C	Energy production and conversion	citrate synthase 3, peroxisomal [Brassica rapa]
NewGene_3112	552	754	183	77	60	94	8.33413	10.9105	2.56249	1.05388	0.808555	1.39989	0.000711821	-2.81143	down	--	--	Molecular Function: nucleic acid binding (GO:0003676);; Molecular Function: RNA-DNA hybrid ribonuclease activity (GO:0004523);;	--	--	--	--	Reverse transcriptase-like	--	E	Amino acid transport and metabolism	hypothetical protein F2Q68_00026788 [Brassica cretica]
BraA03g018810.3C.gene	39	60	28	182	209	343	0.922191	1.38289	0.62106	4.01528	4.51092	8.18687	1.31394e-07	2.4298	up	[L]	Replication, recombination and repair	Molecular Function: ubiquitin-protein transferase activity (GO:0004842);;	K10260|8.09e-16|cre:CHLREDRAFT_205525|K10260 F-box and WD-40 domain protein 7 | (RefSeq) predicted protein	Ubiquitin mediated proteolysis (ko04120)	--	--	U-box domain	E3 ubiquitin-protein ligase PUB23 OS=Arabidopsis thaliana OX=3702 GN=PUB23 PE=1 SV=1	H	Coenzyme transport and metabolism	E3 ubiquitin-protein ligase PUB23 [Brassica rapa]
BraA09g019440.3C.gene	321	71	41	44	34	13	7.70857	1.6185	0.906814	0.964496	0.726404	0.308671	0.00870716	-2.43942	down	[M]	Cell wall/membrane/envelope biogenesis	Molecular Function: catalytic activity (GO:0003824);;	K13082|4.82e-282|boe:106315758|K13082 bifunctional dihydroflavonol 4-reductase/flavanone 4-reductase [EC:1.1.1.219 1.1.1.234] | (RefSeq) dihydroflavonol-4-reductase	Flavonoid biosynthesis (ko00941)	[V]	Defense mechanisms	NAD dependent epimerase/dehydratase family	Dihydroflavonol 4-reductase OS=Arabidopsis thaliana OX=3702 GN=DFRA PE=1 SV=2	V	Defense mechanisms	dihydroflavonol 4-reductase [Brassica rapa]
BraA01g010260.3C.gene	712	583	693	464	189	368	31.1343	24.4063	28.1952	18.5632	7.39726	15.9072	0.00606378	-1.07101	down	--	--	Biological Process: DNA-templated transcription, termination (GO:0006353);;	--	--	--	--	Rho termination factor, N-terminal domain	--	--	--	uncharacterized protein LOC103856784 isoform X1 [Brassica rapa]
BraA10g016590.3C.gene	269	100	97	45	72	26	4.56886	1.62797	1.52771	0.69123	1.09328	0.427096	0.00473622	-1.87046	down	--	--	Molecular Function: phosphatidylinositol phospholipase C activity (GO:0004435);; Biological Process: lipid catabolic process (GO:0016042);; Biological Process: phosphatidylinositol-mediated signaling (GO:0048015);; Biological Process: release of sequestered calcium ion into cytosol (GO:0051209);;	K05857|0.0|bna:106420251|K05857 phosphatidylinositol phospholipase C, delta [EC:3.1.4.11] | (RefSeq) phosphoinositide phospholipase C 4-like	Inositol phosphate metabolism (ko00562);; Phosphatidylinositol signaling system (ko04070)	[T]	Signal transduction mechanisms	Phosphatidylinositol-specific phospholipase C, X domain	Phosphoinositide phospholipase C 4 OS=Arabidopsis thaliana OX=3702 GN=PLC4 PE=2 SV=2	I	Lipid transport and metabolism	phosphoinositide phospholipase C 4 [Brassica rapa]
BraA10g010520.3C.gene	7416	7540	5098	3332	3621	3900	188.662	183.674	120.614	77.6019	82.6382	98.1529	1.36804e-05	-1.00691	down	[ER]	Amino acid transport and metabolism;; General function prediction only	Molecular Function: zinc ion binding (GO:0008270);; Molecular Function: oxidoreductase activity (GO:0016491);;	K00008|1.02e-265|brp:103832662|K00008 L-iditol 2-dehydrogenase [EC:1.1.1.14] | (RefSeq) sorbitol dehydrogenase	Pentose and glucuronate interconversions (ko00040);; Fructose and mannose metabolism (ko00051)	[Q]	Secondary metabolites biosynthesis, transport and catabolism	Alcohol dehydrogenase GroES-like domain	Sorbitol dehydrogenase OS=Arabidopsis thaliana OX=3702 GN=SDH PE=1 SV=1	Q	Secondary metabolites biosynthesis, transport and catabolism	sorbitol dehydrogenase [Brassica rapa]
BraA07g042640.3C.gene	1303	1231	685	465	587	586	79.0737	71.516	38.6401	25.8183	31.9706	35.1836	0.000969919	-1.10216	down	[O]	Posttranslational modification, protein turnover, chaperones	Cellular Component: cellular_component (GO:0005575);; Cellular Component: intracellular (GO:0005622);; Cellular Component: obsolete cell (GO:0005623);; Cellular Component: nucleus (GO:0005634);; Cellular Component: cytoplasm (GO:0005737);; Biological Process: biological_process (GO:0008150);; Biological Process: response to radiation (GO:0009314);; Biological Process: response to light stimulus (…	K03686|9.91e-08|mcha:111008684|K03686 molecular chaperone DnaJ | (RefSeq) uncharacterized protein LOC111008684 isoform X1	--	[O]	Posttranslational modification, protein turnover, chaperones	DnaJ domain	Chaperone protein dnaJ 8, chloroplastic OS=Arabidopsis thaliana OX=3702 GN=ATJ8 PE=2 SV=1	O	Posttranslational modification, protein turnover, chaperones	chaperone protein dnaJ 8, chloroplastic [Brassica rapa]
BraA04g001870.3C.gene	76	67	107	184	168	196	3.26731	2.76865	4.2854	7.27756	6.50836	8.34917	0.00488337	1.02728	up	--	--	Cellular Component: nucleolus (GO:0005730);; Biological Process: rRNA processing (GO:0006364);; Cellular Component: small-subunit processome (GO:0032040);;	K14769|2.56e-155|brp:103862887|K14769 U3 small nucleolar RNA-associated protein 11 | (RefSeq) probable U3 small nucleolar RNA-associated protein 11	--	[S]	Function unknown	Utp11 protein	Probable U3 small nucleolar RNA-associated protein 11 OS=Arabidopsis thaliana OX=3702 GN=At3g60360 PE=1 SV=1	S	Function unknown	probable U3 small nucleolar RNA-associated protein 11 [Brassica rapa]
BraA05g034600.3C.gene	842	657	414	268	392	282	29.7348	22.221	13.5822	8.64531	12.4245	9.84791	0.00140897	-1.16129	down	--	--	Biological Process: regulation of transcription, DNA-templated (GO:0006355);; Biological Process: circadian rhythm (GO:0007623);;	--	--	--	--	--	Protein LNK3 OS=Arabidopsis thaliana OX=3702 GN=LNK3 PE=1 SV=1	--	--	protein LNK3 isoform X1 [Brassica rapa]
BraA06g014920.3C.gene	41	24	57	125	190	205	1.63199	0.888115	2.1033	4.55495	6.81579	8.10626	2.22501e-05	1.99174	up	--	--	--	K12173|5.45e-50|gmx:100794341|K12173 BRCA1-A complex subunit BRE | (RefSeq) BRISC and BRCA1-A complex member 2	Homologous recombination (ko03440)	--	--	Thaumatin family	Pathogenesis-related protein 5 OS=Arabidopsis thaliana OX=3702 GN=At1g75040 PE=1 SV=1	O	Posttranslational modification, protein turnover, chaperones	pathogenesis-related protein 5 [Brassica rapa]
BraA08g029150.3C.gene	615	320	176	87	54	107	21.8099	10.8384	5.77466	2.80006	1.69495	3.74854	2.49619e-05	-2.29189	down	--	--	Molecular Function: phosphatase activity (GO:0016791);; Molecular Function: metal ion binding (GO:0046872);;	K13248|1.07e-206|brp:103835945|K13248 pyridoxal phosphate phosphatase PHOSPHO2 [EC:3.1.3.74] | (RefSeq) inorganic pyrophosphatase 2	Vitamin B6 metabolism (ko00750)	[R]	General function prediction only	Putative Phosphatase	Inorganic pyrophosphatase 2 OS=Arabidopsis thaliana OX=3702 GN=At1g17710 PE=2 SV=1	S	Function unknown	inorganic pyrophosphatase 2 [Brassica rapa]
NewGene_3334	130	228	110	19	66	49	1.54951	2.35726	1.16489	0.20313	0.562207	0.505658	0.00143237	-1.92402	down	[T]	Signal transduction mechanisms	Molecular Function: protein serine/threonine kinase activity (GO:0004674);; Molecular Function: ATP binding (GO:0005524);; Cellular Component: plasma membrane (GO:0005886);; Biological Process: hormone-mediated signaling pathway (GO:0009755);; Cellular Component: integral component of membrane (GO:0016021);;	K13428|3.33e-171|ath:AT5G20480|K13428 LRR receptor-like serine/threonine-protein kinase EFR [EC:2.7.11.1] | (RefSeq) EFR; EF-TU receptor	Plant-pathogen interaction (ko04626)	--	--	Protein tyrosine and serine/threonine kinase	Probable LRR receptor-like serine/threonine-protein kinase At3g47570 OS=Arabidopsis thaliana OX=3702 GN=At3g47570 PE=2 SV=1	T	Signal transduction mechanisms	probable LRR receptor-like serine/threonine-protein kinase At3g47570 [Brassica rapa]
BraA09g063880.3C.gene	7857	5469	2406	1373	1520	1666	175.11	116.725	49.8558	27.9995	30.3915	36.7326	0.0075695	-1.92368	down	[ER]	Amino acid transport and metabolism;; General function prediction only	Molecular Function: 4-hydroxyphenylpyruvate dioxygenase activity (GO:0003868);; Biological Process: aromatic amino acid family metabolic process (GO:0009072);; Molecular Function: metal ion binding (GO:0046872);;	K00457|0.0|brp:103843547|K00457 4-hydroxyphenylpyruvate dioxygenase [EC:1.13.11.27] | (RefSeq) 4-hydroxyphenylpyruvate dioxygenase	Ubiquinone and other terpenoid-quinone biosynthesis (ko00130);; Tyrosine metabolism (ko00350);; Phenylalanine metabolism (ko00360)	[E]	Amino acid transport and metabolism	Glyoxalase/Bleomycin resistance protein/Dioxygenase superfamily	4-hydroxyphenylpyruvate dioxygenase OS=Arabidopsis thaliana OX=3702 GN=HPD PE=1 SV=2	E	Amino acid transport and metabolism	4-hydroxyphenylpyruvate dioxygenase [Brassica rapa]
BraA05g040690.3C.gene	439	403	258	149	151	243	7.88236	6.94095	4.30675	2.45302	2.4255	4.31797	0.00733194	-1.1296	down	--	--	Molecular Function: peptide:proton symporter activity (GO:0015333);; Cellular Component: integral component of membrane (GO:0016021);; Molecular Function: oligopeptide transmembrane transporter activity (GO:0035673);; Molecular Function: peptide transmembrane transporter activity (GO:1904680);;	K14638|7.17e-210|cpap:110820281|K14638 solute carrier family 15 (peptide/histidine transporter), member 3/4 | (RefSeq) protein NRT1/ PTR FAMILY 5.9	--	[E]	Amino acid transport and metabolism	POT family	Protein NRT1/ PTR FAMILY 5.9 OS=Arabidopsis thaliana OX=3702 GN=NPF5.9 PE=2 SV=1	E	Amino acid transport and metabolism	protein NRT1/ PTR FAMILY 5.9 [Brassica rapa]
BraA01g018020.3C.gene	227	222	293	925	742	548	7.64152	7.17646	9.19043	28.5878	22.4761	18.2981	3.44667e-10	1.45481	up	[C]	Energy production and conversion	Molecular Function: NAD(P)H dehydrogenase (quinone) activity (GO:0003955);; Molecular Function: calcium ion binding (GO:0005509);; Molecular Function: FMN binding (GO:0010181);; Biological Process: oxidation-reduction process (GO:0055114);;	K03809|6.75e-108|brp:103866981|K03809 NAD(P)H dehydrogenase (quinone) [EC:1.6.5.2] | (RefSeq) probable NAD(P)H dehydrogenase (quinone) FQR1-like 1	Ubiquinone and other terpenoid-quinone biosynthesis (ko00130)	[R]	General function prediction only	EF-hand domain pair	Probable NAD(P)H dehydrogenase (quinone) FQR1-like 1 OS=Arabidopsis thaliana OX=3702 GN=At4g27270 PE=1 SV=1	L	Replication, recombination and repair	hypothetical protein E3N88_27513 [Mikania micrantha]
BraA05g003680.3C.gene	327	225	259	495	488	788	11.4329	7.52881	8.40471	15.8246	15.2847	27.2608	0.00496034	1.02283	up	[R]	General function prediction only	Molecular Function: chitinase activity (GO:0004568);; Biological Process: carbohydrate metabolic process (GO:0005975);; Biological Process: chitin catabolic process (GO:0006032);; Molecular Function: chitin binding (GO:0008061);; Biological Process: cell wall macromolecule catabolic process (GO:0016998);;	K01183|3.07e-200|brp:103866727|K01183 chitinase [EC:3.2.1.14] | (RefSeq) endochitinase CHI	Amino sugar and nucleotide sugar metabolism (ko00520)	[R]	General function prediction only	Chitinase class I	Endochitinase CHI OS=Arabidopsis thaliana OX=3702 GN=CHI PE=2 SV=1	S	Function unknown	chitinase 1 [Brassica rapa subsp. pekinensis]
BraA08g027350.3C.gene	190	73	83	53	28	26	7.45941	2.73985	2.99679	1.89745	0.971513	0.976144	0.00480522	-1.84089	down	--	--	Cellular Component: plasma membrane (GO:0005886);; Biological Process: carbohydrate transport (GO:0008643);; Cellular Component: integral component of membrane (GO:0016021);; Molecular Function: sugar transmembrane transporter activity (GO:0051119);;	K15382|2.25e-149|bna:106425885|K15382 solute carrier family 50 (sugar transporter) | (RefSeq) bidirectional sugar transporter SWEET1	--	[R]	General function prediction only	Sugar efflux transporter for intercellular exchange	Bidirectional sugar transporter SWEET1 OS=Arabidopsis thaliana OX=3702 GN=SWEET1 PE=1 SV=1	U	Intracellular trafficking, secretion, and vesicular transport	bidirectional sugar transporter SWEET1 [Brassica rapa]
BraA09g008820.3C.gene	132	192	155	54	71	88	4.73233	6.62155	5.1957	1.75623	2.29988	3.11383	0.00184924	-1.27354	down	--	--	Cellular Component: integral component of membrane (GO:0016021);;	K13420|4.84e-06|aof:109844526|K13420 LRR receptor-like serine/threonine-protein kinase FLS2 [EC:2.7.11.1] | (RefSeq) LRR receptor-like serine/threonine-protein kinase FLS2	MAPK signaling pathway - plant (ko04016);; Plant-pathogen interaction (ko04626)	[R]	General function prediction only	Leucine rich repeat	Receptor-like protein 57 OS=Arabidopsis thaliana OX=3702 GN=RLP57 PE=2 SV=1	S	Function unknown	receptor-like protein 57 [Brassica rapa]
BraA03g007440.3C.gene	2175	1844	840	567	533	595	38.9882	31.6561	13.9921	9.29396	8.56515	10.5518	0.00652589	-1.65288	down	[IQ]	Lipid transport and metabolism;; Secondary metabolites biosynthesis, transport and catabolism	Molecular Function: catalytic activity (GO:0003824);;	K23618|4.71e-206|cpap:110816097|K23618 acyl-activating enzyme 11/12 [EC:6.2.1.2 6.2.1.-] | (RefSeq) butyrate--CoA ligase AAE11, peroxisomal-like	--	[I]	Lipid transport and metabolism	AMP-binding enzyme	Probable acyl-activating enzyme 5, peroxisomal OS=Arabidopsis thaliana OX=3702 GN=AAE5 PE=1 SV=1	I	Lipid transport and metabolism	probable acyl-activating enzyme 5, peroxisomal [Brassica rapa]
BraA09g009010.3C.gene	114	146	124	443	508	912	1.5602	1.90653	1.57307	5.54929	6.22785	12.3492	6.48907e-10	2.18829	up	[O]	Posttranslational modification, protein turnover, chaperones	Molecular Function: serine-type endopeptidase activity (GO:0004252);;	K15333|7.11e-86|nsy:104224633|K15333 tRNA guanosine-2'-O-methyltransferase [EC:2.1.1.34] | (RefSeq) uncharacterized protein LOC104224633	--	--	--	Subtilase family	Subtilisin-like protease SBT1.7 OS=Arabidopsis thaliana OX=3702 GN=SBT1.7 PE=1 SV=1	O	Posttranslational modification, protein turnover, chaperones	subtilisin-like protease SBT1.7 [Brassica rapa]
BraA05g014240.3C.gene	195	388	235	511	812	766	5.4173	10.3203	6.05477	12.9999	20.2512	21.0439	0.000577	1.24261	up	--	--	Molecular Function: protein serine/threonine phosphatase activity (GO:0004722);; Molecular Function: magnesium-dependent protein serine/threonine phosphatase activity (GO:0004724);; Molecular Function: metal ion binding (GO:0046872);;	K17506|1.49e-244|bna:106429841|K17506 protein phosphatase 1L [EC:3.1.3.16] | (RefSeq) probable protein phosphatase 2C 25	--	[T]	Signal transduction mechanisms	Protein phosphatase 2C	Probable protein phosphatase 2C 25 OS=Arabidopsis thaliana OX=3702 GN=At2g30020 PE=1 SV=1	T	Signal transduction mechanisms	probable protein phosphatase 2C 25 isoform X2 [Brassica rapa]
BraA09g053340.3C.gene	8352	8819	5226	4094	4348	3655	353.204	357.147	205.523	158.506	164.948	152.946	3.60646e-05	-1.02093	down	[VI]	Defense mechanisms;; Lipid transport and metabolism	Molecular Function: peroxidase activity (GO:0004601);; Molecular Function: glutathione peroxidase activity (GO:0004602);; Biological Process: response to oxidative stress (GO:0006979);;	K00432|5.87e-168|brp:103842214|K00432 glutathione peroxidase [EC:1.11.1.9] | (RefSeq) phospholipid hydroperoxide glutathione peroxidase 1, chloroplastic	Glutathione metabolism (ko00480);; Arachidonic acid metabolism (ko00590)	[O]	Posttranslational modification, protein turnover, chaperones	Glutathione peroxidase	Phospholipid hydroperoxide glutathione peroxidase 1, chloroplastic OS=Arabidopsis thaliana OX=3702 GN=GPX1 PE=2 SV=2	O	Posttranslational modification, protein turnover, chaperones	phospholipid hydroperoxide glutathione peroxidase 1, chloroplastic [Brassica rapa]
BraA01g035980.3C.gene	29	26	39	85	117	77	1.14151	0.960453	1.42063	3.10068	4.17858	3.0402	0.00265224	1.44963	up	--	--	Molecular Function: carbohydrate binding (GO:0030246);;	K15450|3.43e-06|mtr:MTR_4g132120|K15450 tRNA wybutosine-synthesizing protein 3 [EC:2.1.1.282] | (RefSeq) tRNA wybutosine-synthesizing 2/3/4-like protein	--	--	--	Kelch motif	Nitrile-specifier protein 2 OS=Arabidopsis thaliana OX=3702 GN=NSP2 PE=2 SV=1	S	Function unknown	nitrile-specifier protein 2 [Brassica rapa]
BraA06g004920.3C.gene	787	664	509	288	372	335	54.419	43.9572	32.7187	18.2125	23.057	22.92	7.57715e-05	-1.10507	down	--	--	Molecular Function: enzyme inhibitor activity (GO:0004857);; Biological Process: negative regulation of catalytic activity (GO:0043086);;	--	--	--	--	Plant invertase/pectin methylesterase inhibitor	Cell wall / vacuolar inhibitor of fructosidase 1 OS=Arabidopsis thaliana OX=3702 GN=C/VIF1 PE=1 SV=1	S	Function unknown	cell wall / vacuolar inhibitor of fructosidase 1 [Brassica rapa]
BraA03g042600.3C.gene	14	17	21	47	70	253	0.838931	0.991006	1.18095	2.59307	3.8033	15.28	0.000661373	2.7774	up	[S]	Function unknown	Cellular Component: extracellular region (GO:0005576);;	K13449|6.06e-121|bna:106439741|K13449 pathogenesis-related protein 1 | (RefSeq) pathogenesis-related protein 1	MAPK signaling pathway - plant (ko04016);; Plant hormone signal transduction (ko04075);; Plant-pathogen interaction (ko04626)	[S]	Function unknown	Cysteine-rich secretory protein family	Pathogenesis-related protein 1 OS=Arabidopsis thaliana OX=3702 GN=PRB1 PE=2 SV=1	--	--	pathogenesis-related protein 1 [Brassica rapa]
BraA01g019870.3C.gene	646	391	194	93	108	129	24.194	14.0161	6.73122	3.1797	3.61121	4.77782	3.22167e-05	-2.03378	down	[I]	Lipid transport and metabolism	Biological Process: jasmonic acid metabolic process (GO:0009694);; Biological Process: salicylic acid metabolic process (GO:0009696);; Molecular Function: hydrolase activity (GO:0016787);; Molecular Function: methyl indole-3-acetate esterase activity (GO:0080030);; Molecular Function: methyl salicylate esterase activity (GO:0080031);; Molecular Function: methyl jasmonate esterase activity (GO:008…	K13544|1.24e-193|brp:103869295|K13544 pheophorbidase [EC:3.1.1.82] | (RefSeq) pheophorbidase	Porphyrin and chlorophyll metabolism (ko00860)	--	--	Alpha/beta hydrolase family	Pheophorbidase OS=Raphanus sativus OX=3726 GN=PPD PE=1 SV=1	H	Coenzyme transport and metabolism	pheophorbidase [Brassica rapa]
BraA03g046280.3C.gene	2663	2509	1789	1014	1186	1273	27.5607	24.8656	17.2162	9.60447	11.0133	13.0385	3.82541e-06	-1.12403	down	[G]	Carbohydrate transport and metabolism	Molecular Function: ATP binding (GO:0005524);; Biological Process: pyruvate metabolic process (GO:0006090);; Molecular Function: kinase activity (GO:0016301);; Molecular Function: metal ion binding (GO:0046872);; Molecular Function: pyruvate, phosphate dikinase activity (GO:0050242);;	K01006|0.0|bna:106440038|K01006 pyruvate, orthophosphate dikinase [EC:2.7.9.1] | (RefSeq) pyruvate, phosphate dikinase 1, chloroplastic	Glycolysis / Gluconeogenesis (ko00010);; Pyruvate metabolism (ko00620);; Carbon fixation in photosynthetic organisms (ko00710);; Carbon metabolism (ko01200)	--	--	PEP-utilising enzyme, PEP-binding domain	Pyruvate, phosphate dikinase 1, chloroplastic OS=Arabidopsis thaliana OX=3702 GN=PPDK PE=1 SV=2	F	Nucleotide transport and metabolism	pyruvate, phosphate dikinase 1, chloroplastic [Brassica rapa]
BraA01g006370.3C.gene	144	79	62	34	42	33	3.48402	1.83333	1.38897	0.736822	0.894565	0.784043	0.00978275	-1.52731	down	[QV]	Secondary metabolites biosynthesis, transport and catabolism;; Defense mechanisms	Molecular Function: iron ion binding (GO:0005506);; Cellular Component: membrane (GO:0016020);; Molecular Function: oxidoreductase activity, acting on paired donors, with incorporation or reduction of molecular oxygen, NAD(P)H as one donor, and incorporation of one atom of oxygen (GO:0016709);; Molecular Function: heme binding (GO:0020037);;	K20617|8.85e-154|eus:EUTSA_v10010307mg|K20617 cytochrome P450 family 71 subfamily A | (RefSeq) hypothetical protein	--	[Q]	Secondary metabolites biosynthesis, transport and catabolism	Cytochrome P450	Cytochrome P450 71B2 OS=Arabidopsis thaliana OX=3702 GN=CYP71B2 PE=2 SV=2	Q	Secondary metabolites biosynthesis, transport and catabolism	cytochrome P450 71B2-like isoform X1 [Brassica napus]
BraA02g021820.3C.gene	434	707	481	1288	1448	1406	22.7052	35.4151	23.3766	61.6992	68.0203	72.8043	7.40994e-08	1.2382	up	[V]	Defense mechanisms	Cellular Component: nucleus (GO:0005634);; Cellular Component: cytoplasm (GO:0005737);; Molecular Function: hydrolase activity (GO:0016787);;	K07766|1.74e-140|brp:103852850|K07766 diphosphoinositol-polyphosphate diphosphatase [EC:3.6.1.52] | (RefSeq) nudix hydrolase 21, chloroplastic	--	[T]	Signal transduction mechanisms	NUDIX domain	Nudix hydrolase 21, chloroplastic OS=Arabidopsis thaliana OX=3702 GN=NUDT21 PE=2 SV=1	T	Signal transduction mechanisms	nudix hydrolase 21, chloroplastic [Brassica rapa]
BraA09g023530.3C.gene	541	427	323	215	212	163	22.3677	16.9037	12.4208	8.13898	7.85431	6.66097	4.05195e-05	-1.26637	down	[O]	Posttranslational modification, protein turnover, chaperones	Molecular Function: glutathione transferase activity (GO:0004364);; Cellular Component: cytoplasm (GO:0005737);; Biological Process: L-phenylalanine catabolic process (GO:0006559);; Biological Process: glutathione metabolic process (GO:0006749);; Molecular Function: maleylacetoacetate isomerase activity (GO:0016034);;	K01800|6.88e-174|brp:103839444|K01800 maleylacetoacetate isomerase [EC:5.2.1.2] | (RefSeq) glutathione S-transferase Z1	Tyrosine metabolism (ko00350)	[O]	Posttranslational modification, protein turnover, chaperones	Glutathione S-transferase, N-terminal domain	Glutathione S-transferase Z1 OS=Arabidopsis thaliana OX=3702 GN=GSTZ1 PE=1 SV=1	O	Posttranslational modification, protein turnover, chaperones	glutathione S-transferase Z1-like isoform X1 [Brassica napus]
BraA03g008660.3C.gene	735	791	424	288	222	408	70.552	72.7164	37.8762	25.2625	19.0555	38.7467	0.00348071	-1.19704	down	--	--	Molecular Function: electron transfer activity (GO:0009055);; Molecular Function: protein disulfide oxidoreductase activity (GO:0015035);;	K03676|1.05e-68|bna:106385137|K03676 glutaredoxin 3 | (RefSeq) monothiol glutaredoxin-S2-like	--	[O]	Posttranslational modification, protein turnover, chaperones	Glutaredoxin	Monothiol glutaredoxin-S2 OS=Arabidopsis thaliana OX=3702 GN=GRXS2 PE=3 SV=1	O	Posttranslational modification, protein turnover, chaperones	monothiol glutaredoxin-S2 [Brassica rapa]
BraA03g012140.3C.gene	11	27	26	76	85	66	0.510909	1.18128	1.10502	3.23728	3.57233	3.05038	0.00312581	1.71529	up	--	--	Molecular Function: DNA binding (GO:0003677);; Molecular Function: DNA-directed 5'-3' RNA polymerase activity (GO:0003899);; Cellular Component: RNA polymerase II, core complex (GO:0005665);; Cellular Component: RNA polymerase III complex (GO:0005666);; Cellular Component: RNA polymerase I complex (GO:0005736);; Biological Process: transcription, DNA-templated (GO:0006351);; Cellular Component: h…	K03013|1.81e-137|bna:106435549|K03013 DNA-directed RNA polymerases I, II, and III subunit RPABC1 | (RefSeq) DNA-directed RNA polymerase subunit 5-like protein 1	RNA polymerase (ko03020)	[K]	Transcription	RNA polymerase Rpb5, C-terminal domain	DNA-directed RNA polymerase subunit 5-like protein 1 OS=Arabidopsis thaliana OX=3702 GN=NRPB5L1 PE=3 SV=1	K	Transcription	DNA-directed RNA polymerase subunit 5-like protein 1 [Brassica rapa]
BraA04g004070.3C.gene	10	2	17	201	83	209	0.409796	0.080994	0.682503	7.99677	3.23161	8.97519	1.84305e-09	4.00143	up	--	--	--	--	--	--	--	--	--	--	--	uncharacterized protein LOC103863107 [Brassica rapa]
BraA05g037600.3C.gene	524	698	471	1517	1343	1164	10.9014	13.9186	9.12396	28.9225	25.0969	23.9857	1.65209e-07	1.12361	up	[M]	Cell wall/membrane/envelope biogenesis	Molecular Function: protein kinase activity (GO:0004672);; Molecular Function: ATP binding (GO:0005524);; Cellular Component: integral component of membrane (GO:0016021);;	K13416|1.77e-31|bna:106368734|K13416 brassinosteroid insensitive 1-associated receptor kinase 1 [EC:2.7.10.1 2.7.11.1] | (RefSeq) BRASSINOSTEROID INSENSITIVE 1-associated receptor kinase 1	MAPK signaling pathway - plant (ko04016);; Plant hormone signal transduction (ko04075);; Plant-pathogen interaction (ko04626)	--	--	Protein tyrosine and serine/threonine kinase	Probable inactive receptor kinase At3g08680 OS=Arabidopsis thaliana OX=3702 GN=At3g08680 PE=1 SV=1	T	Signal transduction mechanisms	probable inactive receptor kinase At3g08680 [Brassica rapa]
BraA02g025210.3C.gene	983	851	477	312	353	426	20.0851	16.6598	9.05851	5.82238	6.47011	8.59976	0.00108743	-1.20666	down	--	--	Molecular Function: mRNA binding (GO:0003729);; Cellular Component: cytoplasm (GO:0005737);; Biological Process: mRNA destabilization (GO:0061157);;	K20102|0.0|brp:103853183|K20102 YTH domain-containing family protein | (RefSeq) YTH domain-containing protein ECT2 isoform X1	--	[R]	General function prediction only	YT521-B-like domain	YTH domain-containing protein ECT2 OS=Arabidopsis thaliana OX=3702 GN=ECT2 PE=1 SV=1	S	Function unknown	YTH domain-containing protein ECT2 isoform X1 [Brassica rapa]
BraA04g027680.3C.gene	198	270	135	64	84	53	6.26163	8.17667	3.97208	1.83698	2.37758	1.6618	3.49525e-05	-1.72009	down	[I]	Lipid transport and metabolism	Cellular Component: membrane (GO:0016020);; Molecular Function: lipase activity (GO:0016298);;	K01054|2.68e-228|bna:106447472|K01054 acylglycerol lipase [EC:3.1.1.23] | (RefSeq) caffeoylshikimate esterase	Glycerolipid metabolism (ko00561)	[I]	Lipid transport and metabolism	Serine aminopeptidase, S33	Caffeoylshikimate esterase OS=Arabidopsis thaliana OX=3702 GN=CSE PE=1 SV=1	I	Lipid transport and metabolism	caffeoylshikimate esterase [Brassica rapa]
BraA09g048280.3C.gene	680	522	522	305	329	258	13.2351	9.72807	9.44766	5.43328	5.74834	4.96328	3.58625e-06	-1.0801	down	[O]	Posttranslational modification, protein turnover, chaperones	Molecular Function: serine-type peptidase activity (GO:0008236);;	K03797|0.0|brp:103841674|K03797 carboxyl-terminal processing protease [EC:3.4.21.102] | (RefSeq) carboxyl-terminal-processing peptidase 3, chloroplastic	--	--	--	Peptidase family S41	Carboxyl-terminal-processing peptidase 3, chloroplastic OS=Arabidopsis thaliana OX=3702 GN=CTPA3 PE=3 SV=1	M	Cell wall/membrane/envelope biogenesis	unnamed protein product [Brassica oleracea]
NewGene_621	46	45	32	97	163	90	1.22941	1.18658	0.817058	2.30037	3.60876	2.44243	0.00591157	1.37252	up	--	--	Molecular Function: nucleic acid binding (GO:0003676);; Molecular Function: RNA-DNA hybrid ribonuclease activity (GO:0004523);;	K00430|4.03e-22|bna:106369783|K00430 peroxidase [EC:1.11.1.7] | (RefSeq) peroxidase N-like	Phenylpropanoid biosynthesis (ko00940)	[R]	General function prediction only	zinc-binding in reverse transcriptase	--	E	Amino acid transport and metabolism	uncharacterized protein LOC103870402 [Brassica rapa]
BraA03g029060.3C.gene	26	15	20	75	51	101	1.19278	0.636535	0.84754	3.16974	2.11158	4.60737	0.00534945	1.7927	up	[O]	Posttranslational modification, protein turnover, chaperones	Molecular Function: protein binding (GO:0005515);;	K00799|7.78e-154|bna:106438680|K00799 glutathione S-transferase [EC:2.5.1.18] | (RefSeq) glutathione S-transferase F2	Glutathione metabolism (ko00480)	[O]	Posttranslational modification, protein turnover, chaperones	Glutathione S-transferase, N-terminal domain	Glutathione S-transferase F2 OS=Arabidopsis thaliana OX=3702 GN=GSTF2 PE=1 SV=3	O	Posttranslational modification, protein turnover, chaperones	glutathione S-transferase F2 [Brassica rapa]
BraA02g001210.3C.gene	100	89	42	18	20	10	1.21991	1.04143	0.47155	0.196025	0.214473	0.115201	0.000203268	-2.41606	down	[R]	General function prediction only	Molecular Function: triglyceride lipase activity (GO:0004806);; Biological Process: lipid catabolic process (GO:0016042);;	K14674|0.0|bna:106424050|K14674 TAG lipase / steryl ester hydrolase / phospholipase A2 / LPA acyltransferase [EC:3.1.1.3 3.1.1.13 3.1.1.4 2.3.1.51] | (RefSeq) triacylglycerol lipase SDP1-like	Steroid biosynthesis (ko00100);; Glycerolipid metabolism (ko00561);; Glycerophospholipid metabolism (ko00564);; Ether lipid metabolism (ko00565);; Arachidonic acid metabolism (ko00590);; Linoleic acid metabolism (ko00591);; alpha-Linolenic acid metabolism (ko00592)	[R]	General function prediction only	Domain of unknown function (DUF3336)	Triacylglycerol lipase SDP1 OS=Arabidopsis thaliana OX=3702 GN=SDP1 PE=1 SV=1	I	Lipid transport and metabolism	hypothetical protein BRARA_B00124 [Brassica rapa]
BraA03g023060.3C.gene	245	45	35	16	15	17	6.56304	1.14442	0.866319	0.387772	0.359169	0.447827	0.00137607	-2.91766	down	--	--	Cellular Component: integral component of membrane (GO:0016021);;	K13691|1.16e-236|brp:103858099|K13691 pathogen-inducible salicylic acid glucosyltransferase [EC:2.4.1.-] | (RefSeq) UDP-glycosyltransferase 74F2	--	[GC]	Carbohydrate transport and metabolism;; Energy production and conversion	--	UDP-glycosyltransferase 74F2 OS=Arabidopsis thaliana OX=3702 GN=UGT74F2 PE=1 SV=1	--	--	UDP-glycosyltransferase 74F2-like [Brassica rapa]
NewGene_1344	221	282	416	137	77	138	4.3085	5.27722	7.56787	2.44913	1.34688	2.66432	0.000195705	-1.47593	down	--	--	--	K12617|1.65e-09|thj:104825394|K12617 DNA topoisomerase 2-associated protein PAT1 | (RefSeq) uncharacterized protein LOC104825394	RNA degradation (ko03018)	--	--	Transposase family tnp2	--	S	Function unknown	uncharacterized protein LOC103849495 [Brassica rapa]
BraA02g036490.3C.gene	214	234	142	97	106	90	1.82982	1.91468	1.12492	0.755005	0.809711	0.756422	0.00232362	-1.13899	down	--	--	Molecular Function: protein binding (GO:0005515);;	K02716|9.68e-45|boe:106309075|K02716 photosystem II oxygen-evolving enhancer protein 1 | (RefSeq) LOW QUALITY PROTEIN: oxygen-evolving enhancer protein 1-2, chloroplastic	Photosynthesis (ko00195)	[R]	General function prediction only	Domain of unknown function (DUF4283)	Protein NSP-INTERACTING KINASE 2 OS=Arabidopsis thaliana OX=3702 GN=NIK2 PE=1 SV=1	S	Function unknown	uncharacterized protein LOC106355921 [Brassica napus]
BraA02g042770.3C.gene	178	146	166	48	69	74	5.80966	4.56347	5.04718	1.4332	2.00863	2.3915	7.08749e-05	-1.47198	down	--	--	Molecular Function: DNA-binding transcription factor activity (GO:0003700);; Cellular Component: nucleus (GO:0005634);; Molecular Function: sequence-specific DNA binding (GO:0043565);;	--	--	--	--	TCP family transcription factor	Transcription factor TCP5 OS=Arabidopsis thaliana OX=3702 GN=TCP5 PE=1 SV=1	K	Transcription	transcription factor TCP5 [Brassica rapa]
BraA06g025040.3C.gene	8	12	0	151	82	111	0.229475	0.32964	0	3.95735	2.08564	3.14553	8.27697e-08	3.97166	up	[O]	Posttranslational modification, protein turnover, chaperones	Molecular Function: cysteine-type endopeptidase activity (GO:0004197);; Cellular Component: extracellular space (GO:0005615);; Cellular Component: lysosome (GO:0005764);; Biological Process: proteolysis involved in cellular protein catabolic process (GO:0051603);;	K16292|2.33e-121|jre:108997808|K16292 KDEL-tailed cysteine endopeptidase [EC:3.4.22.-] | (RefSeq) senescence-specific cysteine protease SAG39-like	--	[O]	Posttranslational modification, protein turnover, chaperones	Papain family cysteine protease	Senescence-specific cysteine protease SAG12 OS=Arabidopsis thaliana OX=3702 GN=SAG12 PE=1 SV=1	O	Posttranslational modification, protein turnover, chaperones	macrodontain-1 [Brassica rapa]
BraA07g026050.3C.gene	6020	6014	2328	1354	1396	1785	365.43	349.649	131.448	75.2241	76.0142	107.236	0.00759439	-1.78888	down	[O]	Posttranslational modification, protein turnover, chaperones	Cellular Component: cellular_component (GO:0005575);; Cellular Component: intracellular (GO:0005622);; Cellular Component: obsolete cell (GO:0005623);; Cellular Component: nucleus (GO:0005634);; Cellular Component: cytoplasm (GO:0005737);; Biological Process: biological_process (GO:0008150);; Biological Process: response to radiation (GO:0009314);; Biological Process: response to light stimulus (…	K03686|1.14e-06|mcha:111008684|K03686 molecular chaperone DnaJ | (RefSeq) uncharacterized protein LOC111008684 isoform X1	--	[O]	Posttranslational modification, protein turnover, chaperones	DnaJ domain	Chaperone protein dnaJ 8, chloroplastic OS=Arabidopsis thaliana OX=3702 GN=ATJ8 PE=2 SV=1	O	Posttranslational modification, protein turnover, chaperones	chaperone protein dnaJ 8, chloroplastic [Brassica rapa]
BraA05g004880.3C.gene	68	151	215	577	441	542	2.43435	5.18153	7.13728	18.9337	14.1645	19.2007	9.24709e-06	1.75548	up	--	--	Cellular Component: extracellular region (GO:0005576);; Biological Process: sexual reproduction (GO:0019953);;	K20628|2.66e-92|pvu:PHAVU_007G235300g|K20628 expansin | (RefSeq) hypothetical protein	--	--	--	Expansin C-terminal domain	Putative expansin-B2 OS=Arabidopsis thaliana OX=3702 GN=EXPB2 PE=3 SV=2	S	Function unknown	putative expansin-B2 [Brassica rapa]
BraA02g011070.3C.gene	198	93	194	62	79	62	17.3028	7.76943	15.7362	4.96778	6.20482	5.36712	0.0029617	-1.37785	down	--	--	Biological Process: lipid transport (GO:0006869);; Molecular Function: lipid binding (GO:0008289);; Cellular Component: membrane (GO:0016020);;	--	--	--	--	Protease inhibitor/seed storage/LTP family	Non-specific lipid-transfer protein 4 OS=Arabidopsis thaliana OX=3702 GN=LTP4 PE=3 SV=1	T	Signal transduction mechanisms	non-specific lipid-transfer protein 4 [Brassica rapa]
BraA07g036640.3C.gene	375	229	193	101	107	83	17.7515	10.3559	8.45562	4.33754	4.50545	3.85332	4.12777e-05	-1.59288	down	--	--	Molecular Function: endopeptidase inhibitor activity (GO:0004866);;	--	--	--	--	Trypsin and protease inhibitor	Kunitz trypsin inhibitor 2 OS=Arabidopsis thaliana OX=3702 GN=KTI2 PE=1 SV=1	--	--	kunitz trypsin inhibitor 2 [Brassica rapa]
BraA10g013290.3C.gene	91	108	171	491	298	482	8.70091	9.89059	15.2721	43.141	25.6184	45.8138	1.86873e-06	1.68725	up	--	--	Molecular Function: fatty acid binding (GO:0005504);; Biological Process: systemic acquired resistance (GO:0009627);;	--	--	--	--	Probable lipid transfer	--	--	--	putative lipid-transfer protein DIR1 [Brassica rapa]
NewGene_123	112	134	103	762	247	198	2.1966	2.51264	1.88253	13.7451	4.36399	3.85862	0.00314732	1.64916	up	--	--	--	--	--	--	--	--	--	--	--	uncharacterized protein LOC103841621 [Brassica rapa]
BraA06g043490.3C.gene	33	50	74	153	126	145	0.87188	1.27279	1.85611	3.78535	3.05438	3.87525	0.00285803	1.3341	up	[G]	Carbohydrate transport and metabolism	Molecular Function: kinase activity (GO:0016301);; Molecular Function: phosphotransferase activity, alcohol group as acceptor (GO:0016773);;	K01177|1.58e-99|obr:102715792|K01177 beta-amylase [EC:3.2.1.2] | (RefSeq) uncharacterized LOC102715792	Starch and sucrose metabolism (ko00500)	[G]	Carbohydrate transport and metabolism	pfkB family carbohydrate kinase	Probable fructokinase-6, chloroplastic OS=Arabidopsis thaliana OX=3702 GN=At1g66430 PE=2 SV=1	G	Carbohydrate transport and metabolism	5-dehydro-2-deoxygluconokinase [Brassica rapa]
BraA01g010840.3C.gene	0	0	0	37	90	49	0	0	0	0.817187	1.94928	1.17044	2.22532e-07	8.18991	up	--	--	Cellular Component: nucleus (GO:0005634);; Biological Process: regulation of transcription by RNA polymerase II (GO:0006357);; Cellular Component: cyclin/CDK positive transcription elongation factor complex (GO:0008024);; Molecular Function: cyclin-dependent protein serine/threonine kinase regulator activity (GO:0016538);; Biological Process: positive regulation of DNA-templated transcription, el…	K15188|4.55e-288|brp:103857462|K15188 cyclin T | (RefSeq) cyclin-T1-2	--	[D]	Cell cycle control, cell division, chromosome partitioning	Cyclin, N-terminal domain	Cyclin-T1-2 OS=Arabidopsis thaliana OX=3702 GN=CYCT1-2 PE=2 SV=2	D	Cell cycle control, cell division, chromosome partitioning	cyclin-T1-2 [Brassica rapa]
BraA03g031390.3C.gene	170	274	356	1935	1054	2724	10.064	15.5054	19.6146	104.974	56.0187	159.728	3.96489e-06	2.7619	up	--	--	--	--	--	--	--	--	--	--	--	uncharacterized protein LOC103859009 [Brassica rapa]
NewGene_3209	1353	1015	771	467	454	415	23.6061	16.964	12.5041	7.44808	7.09645	7.15321	3.30364e-07	-1.3655	down	[QV]	Secondary metabolites biosynthesis, transport and catabolism;; Defense mechanisms	Molecular Function: monooxygenase activity (GO:0004497);; Molecular Function: iron ion binding (GO:0005506);; Molecular Function: oxidoreductase activity, acting on paired donors, with incorporation or reduction of molecular oxygen (GO:0016705);; Molecular Function: heme binding (GO:0020037);;	K20617|8.46e-187|boe:106298990|K20617 cytochrome P450 family 71 subfamily A | (RefSeq) cytochrome P450 71B5	--	[Q]	Secondary metabolites biosynthesis, transport and catabolism	Cytochrome P450	Cytochrome P450 71B3 OS=Arabidopsis thaliana OX=3702 GN=CYP71B3 PE=2 SV=2	Q	Secondary metabolites biosynthesis, transport and catabolism	cytochrome P450 71B3 [Brassica rapa]
BraA02g010850.3C.gene	99	128	111	363	148	340	1.11556	1.38776	1.15991	3.76174	1.49954	3.80549	0.00962793	1.23125	up	[M]	Cell wall/membrane/envelope biogenesis	Molecular Function: protein kinase activity (GO:0004672);; Molecular Function: ATP binding (GO:0005524);; Cellular Component: integral component of membrane (GO:0016021);;	K16224|4.63e-216|boe:106304564|K16224 senescence-induced receptor-like serine/threonine-protein kinase | (RefSeq) senescence-induced receptor-like serine/threonine-protein kinase	MAPK signaling pathway - plant (ko04016);; Plant-pathogen interaction (ko04626)	--	--	Malectin-like domain	Receptor-like protein kinase At5g59670 OS=Arabidopsis thaliana OX=3702 GN=At5g59670 PE=1 SV=1	T	Signal transduction mechanisms	receptor-like protein kinase At5g59670 isoform X1 [Brassica rapa]
BraA03g011300.3C.gene	274	168	159	57	114	72	8.34085	4.9016	4.49976	1.57618	3.11292	2.16685	0.0017993	-1.44379	down	[Q]	Secondary metabolites biosynthesis, transport and catabolism	Molecular Function: metal ion binding (GO:0046872);; Molecular Function: dioxygenase activity (GO:0051213);;	K13229|1.18e-81|sbi:8070754|K13229 2,4-dihydroxy-1,4-benzoxazin-3-one-glucoside dioxygenase [EC:1.14.11.59] | (RefSeq) DIBOA-glucoside dioxygenase BX6	Benzoxazinoid biosynthesis (ko00402)	[QR]	Secondary metabolites biosynthesis, transport and catabolism;; General function prediction only	2OG-Fe(II) oxygenase superfamily	1-aminocyclopropane-1-carboxylate oxidase homolog 12 OS=Arabidopsis thaliana OX=3702 GN=At5g59540 PE=2 SV=1	Q	Secondary metabolites biosynthesis, transport and catabolism	PREDICTED: 1-aminocyclopropane-1-carboxylate oxidase homolog 12-like [Raphanus sativus]
BraA01g021360.3C.gene	182	134	38	14	29	28	2.10267	1.48857	0.407133	0.147283	0.301446	0.313904	0.00101678	-2.45733	down	--	--	Molecular Function: transferase activity, transferring acyl groups other than amino-acyl groups (GO:0016747);;	K13065|2.86e-75|fve:101311200|K13065 shikimate O-hydroxycinnamoyltransferase [EC:2.3.1.133] | (RefSeq) BAHD acyltransferase At5g47980-like	Phenylpropanoid biosynthesis (ko00940);; Flavonoid biosynthesis (ko00941);; Stilbenoid, diarylheptanoid and gingerol biosynthesis (ko00945)	--	--	Transferase family	BAHD acyltransferase BIA1 OS=Arabidopsis thaliana OX=3702 GN=BIA1 PE=2 SV=1	S	Function unknown	BAHD acyltransferase At5g47980 [Brassica rapa]
BraA09g043240.3C.gene	1253	826	654	396	408	441	36.0355	22.742	17.49	10.4192	10.5179	12.5466	7.44211e-05	-1.26317	down	--	--	Cellular Component: membrane (GO:0016020);;	--	--	--	--	Core-2/I-Branching enzyme	Glycosyltransferase BC10 OS=Oryza sativa subsp. japonica OX=39947 GN=BC10 PE=1 SV=1	S	Function unknown	glycosyltransferase BC10 [Brassica rapa]
BraA02g030530.3C.gene	192	421	483	1175	866	1104	2.2592	4.7579	5.30781	12.7085	9.18382	12.9065	3.39156e-05	1.42687	up	[S]	Function unknown	Molecular Function: protein serine/threonine kinase activity (GO:0004674);; Molecular Function: ATP binding (GO:0005524);; Cellular Component: plasma membrane (GO:0005886);; Cellular Component: integral component of membrane (GO:0016021);; Biological Process: protein autophosphorylation (GO:0046777);;	K01180|3.02e-22|cmax:111487562|K01180 endo-1,3(4)-beta-glucanase [EC:3.2.1.6] | (RefSeq) uncharacterized protein LOC111487562	--	--	--	Malectin domain	Probable LRR receptor-like serine/threonine-protein kinase At1g56140 OS=Arabidopsis thaliana OX=3702 GN=At1g56140 PE=2 SV=2	T	Signal transduction mechanisms	probable LRR receptor-like serine/threonine-protein kinase At1g56130 isoform X1 [Brassica rapa]
BraA03g048550.3C.gene	642	560	308	173	271	301	22.9185	19.1313	10.2279	5.64273	8.68039	10.6365	0.00870716	-1.14216	down	--	--	Molecular Function: DNA-binding transcription factor activity (GO:0003700);; Biological Process: transcription, DNA-templated (GO:0006351);; Biological Process: brassinosteroid mediated signaling pathway (GO:0009742);;	K14503|1.56e-60|psom:113330610|K14503 brassinosteroid resistant 1/2 | (RefSeq) protein BZR1 homolog 1-like	Plant hormone signal transduction (ko04075)	--	--	BES1/BZR1 plant transcription factor, N-terminal	BES1/BZR1 homolog protein 3 OS=Arabidopsis thaliana OX=3702 GN=BEH3 PE=1 SV=1	S	Function unknown	BES1/BZR1 homolog protein 3 [Brassica rapa]
BraA09g009020.3C.gene	882	901	1244	2461	2366	3120	11.4892	11.2423	15.082	29.3698	27.6668	40.2416	8.378e-10	1.2946	up	[O]	Posttranslational modification, protein turnover, chaperones	Molecular Function: serine-type endopeptidase activity (GO:0004252);;	K15333|6.19e-84|nsy:104224633|K15333 tRNA guanosine-2'-O-methyltransferase [EC:2.1.1.34] | (RefSeq) uncharacterized protein LOC104224633	--	--	--	Subtilase family	Subtilisin-like protease SBT1.7 OS=Arabidopsis thaliana OX=3702 GN=SBT1.7 PE=1 SV=1	O	Posttranslational modification, protein turnover, chaperones	subtilisin-like protease SBT1.7 [Brassica rapa]
BraA01g043260.3C.gene	95	131	74	29	47	20	2.35639	3.1245	1.72407	0.663484	1.05558	0.471529	0.00108743	-1.78375	down	--	--	Molecular Function: DNA binding (GO:0003677);; Cellular Component: nucleus (GO:0005634);;	K12580|4.11e-73|aly:110227739|K12580 CCR4-NOT transcription complex subunit 3 | (RefSeq) myb-related protein 1-like isoform X1	RNA degradation (ko03018)	--	--	MYB-CC type transfactor, LHEQLE motif	Myb-related protein 2 OS=Arabidopsis thaliana OX=3702 GN=MYR2 PE=1 SV=1	K	Transcription	myb-related protein 2 [Brassica rapa]
BraA01g001610.3C.gene	1275	1919	1247	830	902	662	16.555	23.8552	15.0529	9.8633	10.5037	8.49894	2.1436e-05	-1.01828	down	[U]	Intracellular trafficking, secretion, and vesicular transport	Molecular Function: protein kinase activity (GO:0004672);; Molecular Function: ATP binding (GO:0005524);; Cellular Component: integral component of membrane (GO:0016021);;	K13415|3.90e-30|pda:103704826|K13415 protein brassinosteroid insensitive 1 [EC:2.7.10.1 2.7.11.1] | (RefSeq) LOW QUALITY PROTEIN: brassinosteroid LRR receptor kinase BRI1	Plant hormone signal transduction (ko04075)	--	--	Protein kinase domain	Probable LRR receptor-like serine/threonine-protein kinase At4g37250 OS=Arabidopsis thaliana OX=3702 GN=At4g37250 PE=1 SV=1	T	Signal transduction mechanisms	probable LRR receptor-like serine/threonine-protein kinase At4g37250 [Brassica rapa]
BraA03g027960.3C.gene	3	20	38	186	86	88	0.187583	1.38244	2.54451	12.5717	5.6454	6.41533	0.00273994	2.46935	up	--	--	--	K11855|2.30e-21|bvg:104906049|K11855 ubiquitin carboxyl-terminal hydrolase 36/42 [EC:3.4.19.12] | (RefSeq) ubiquitin carboxyl-terminal hydrolase 36	--	--	--	Hydrophobic seed protein	pEARLI1-like lipid transfer protein 1 OS=Arabidopsis thaliana OX=3702 GN=AZI1 PE=1 SV=1	S	Function unknown	lipid transfer protein EARLI 1-like [Brassica rapa]
BraA07g020350.3C.gene	388	261	108	107	69	91	4.97203	3.19806	1.28231	1.25305	0.79415	1.1508	0.00398168	-1.64358	down	[T]	Signal transduction mechanisms	Molecular Function: voltage-gated chloride channel activity (GO:0005247);; Molecular Function: nitrate:proton symporter activity (GO:0009671);; Cellular Component: plant-type vacuole membrane (GO:0009705);; Molecular Function: nitrate transmembrane transporter activity (GO:0015112);; Cellular Component: integral component of membrane (GO:0016021);; Molecular Function: transmembrane transporter ac…	K05016|0.0|bna:106352702|K05016 chloride channel 7 | (RefSeq) chloride channel protein CLC-a	--	[P]	Inorganic ion transport and metabolism	Voltage gated chloride channel	Chloride channel protein CLC-a OS=Arabidopsis thaliana OX=3702 GN=CLC-A PE=1 SV=2	P	Inorganic ion transport and metabolism	chloride channel protein CLC-a [Brassica rapa]
BraA07g015010.3C.gene	622	510	229	211	167	211	14.645	11.4901	5.01599	4.53894	3.52746	4.91601	0.00330192	-1.34092	down	--	--	Cellular Component: integral component of membrane (GO:0016021);;	--	--	[R]	General function prediction only	MORN repeat	--	S	Function unknown	phosphatidylinositol 4-phosphate 5-kinase 3 [Brassica rapa]
BraA02g014080.3C.gene	368	300	245	139	164	135	5.84386	4.55665	3.62346	2.01797	2.33678	2.11934	9.83017e-05	-1.1896	down	[T]	Signal transduction mechanisms	Molecular Function: ion channel activity (GO:0005216);; Cellular Component: integral component of membrane (GO:0016021);;	K05391|0.0|eus:EUTSA_v10012835mg|K05391 cyclic nucleotide gated channel, plant | (RefSeq) hypothetical protein	Plant-pathogen interaction (ko04626)	[PT]	Inorganic ion transport and metabolism;; Signal transduction mechanisms	Ion transport protein	Cyclic nucleotide-gated ion channel 4 OS=Arabidopsis thaliana OX=3702 GN=CNGC4 PE=2 SV=2	P	Inorganic ion transport and metabolism	BnaA02g09790D [Brassica napus]
BraA01g016400.3C.gene	252	827	454	187	180	200	10.4519	32.9032	17.5393	7.11707	6.69409	8.21695	0.000594618	-1.54004	down	--	--	--	--	--	--	--	--	--	S	Function unknown	hypothetical protein DY000_02038340 [Brassica cretica]
BraA07g023990.3C.gene	52	57	80	159	195	102	1.0669	1.12166	1.53916	3.00889	3.61559	2.08429	0.00800555	1.14594	up	--	--	--	--	--	--	--	--	--	--	--	uncharacterized protein LOC103830224 [Brassica rapa]
BraA09g041020.3C.gene	52	30	38	167	149	100	2.14499	1.1569	1.45231	6.33552	5.54099	4.10518	0.00020051	1.65804	up	--	--	Molecular Function: DNA binding (GO:0003677);; Molecular Function: DNA-binding transcription factor activity (GO:0003700);; Cellular Component: nucleus (GO:0005634);;	K09286|4.68e-25|eus:EUTSA_v10000354mg|K09286 EREBP-like factor | (RefSeq) hypothetical protein	--	--	--	AP2 domain	Ethylene-responsive transcription factor ERF012 OS=Arabidopsis thaliana OX=3702 GN=ERF012 PE=2 SV=1	K	Transcription	ethylene-responsive transcription factor ERF012-like [Brassica rapa]
NewGene_1630	1586	1293	1126	624	680	715	46.9156	36.6319	30.9732	16.899	18.0553	20.9137	8.34944e-07	-1.10988	down	[CP]	Energy production and conversion;; Inorganic ion transport and metabolism	Molecular Function: magnesium ion binding (GO:0000287);; Molecular Function: inorganic diphosphatase activity (GO:0004427);; Cellular Component: cytosol (GO:0005829);; Biological Process: phosphate-containing compound metabolic process (GO:0006796);;	K01507|7.19e-155|boe:106315587|K01507 inorganic pyrophosphatase [EC:3.6.1.1] | (RefSeq) soluble inorganic pyrophosphatase 1	Oxidative phosphorylation (ko00190)	[C]	Energy production and conversion	Inorganic pyrophosphatase	Soluble inorganic pyrophosphatase 1 OS=Arabidopsis thaliana OX=3702 GN=PPA1 PE=1 SV=1	C	Energy production and conversion	soluble inorganic pyrophosphatase 1 [Brassica rapa]
BraA04g012060.3C.gene	91	134	116	426	451	303	4.7299	6.66944	5.61714	20.3935	21.1678	15.675	7.7092e-11	1.66676	up	--	--	Molecular Function: calcium ion binding (GO:0005509);; Cellular Component: integral component of membrane (GO:0016021);;	K02183|1.73e-129|brp:103863906|K02183 calmodulin | (RefSeq) probable calcium-binding protein CML46	MAPK signaling pathway - plant (ko04016);; Phosphatidylinositol signaling system (ko04070);; Plant-pathogen interaction (ko04626)	[T]	Signal transduction mechanisms	EF-hand domain pair	Probable calcium-binding protein CML46 OS=Arabidopsis thaliana OX=3702 GN=CML46 PE=1 SV=1	T	Signal transduction mechanisms	probable calcium-binding protein CML46 [Brassica rapa]
BraA04g006990.3C.gene	162	143	78	266	352	305	4.65109	3.93898	2.07418	7.02527	9.09015	8.70555	0.00554309	1.13678	up	--	--	Molecular Function: SNARE binding (GO:0000149);; Molecular Function: SNAP receptor activity (GO:0005484);; Cellular Component: plasma membrane (GO:0005886);; Biological Process: intracellular protein transport (GO:0006886);; Biological Process: exocytosis (GO:0006887);; Biological Process: vesicle fusion (GO:0006906);; Cellular Component: endomembrane system (GO:0012505);; Cellular Component: int…	K08486|3.71e-198|brp:103863466|K08486 syntaxin 1B/2/3 | (RefSeq) syntaxin-122	SNARE interactions in vesicular transport (ko04130)	[U]	Intracellular trafficking, secretion, and vesicular transport	Syntaxin	Syntaxin-122 OS=Arabidopsis thaliana OX=3702 GN=SYP122 PE=1 SV=1	U	Intracellular trafficking, secretion, and vesicular transport	syntaxin-122 [Brassica rapa]
BraA01g001950.3C.gene	37	67	110	308	266	130	2.04707	3.58738	5.70313	15.8533	13.387	7.20085	0.00216676	1.60091	up	--	--	--	--	--	--	--	Domain of unknown function (DUF4228)	--	S	Function unknown	uncharacterized protein LOC103864993 [Brassica rapa]
BraA07g020730.3C.gene	27	30	29	89	84	84	0.556666	0.582654	0.563316	1.69197	1.57292	1.71987	0.00141345	1.46355	up	[T]	Signal transduction mechanisms	Cellular Component: integral component of membrane (GO:0016021);;	K13699|1.45e-06|ini:109149724|K13699 abhydrolase domain-containing protein 5 [EC:2.3.1.51] | (RefSeq) 1-acylglycerol-3-phosphate O-acyltransferase-like	--	[R]	General function prediction only	alpha/beta hydrolase fold	Probable lysophospholipase BODYGUARD 2 OS=Arabidopsis thaliana OX=3702 GN=BDG2 PE=2 SV=1	S	Function unknown	probable lysophospholipase BODYGUARD 2 [Brassica rapa]
BraA07g015410.3C.gene	334	229	55	34	55	42	16.2381	10.6477	2.46277	1.47409	2.38521	1.97941	0.000557534	-2.39059	down	--	--	--	--	--	--	--	PLATZ transcription factor	--	S	Function unknown	uncharacterized protein LOC103829397 [Brassica rapa]
BraA10g027630.3C.gene	87	177	202	389	446	289	1.35378	2.6521	2.93856	5.57184	6.2704	4.4818	0.0021113	1.15731	up	--	--	Biological Process: reproduction (GO:0000003);; Biological Process: regionalization (GO:0003002);; Biological Process: developmental process involved in reproduction (GO:0003006);; Molecular Function: protein binding (GO:0005515);; Biological Process: multicellular organism development (GO:0007275);; Biological Process: pattern specification process (GO:0007389);; Biological Process: biological_p…	--	--	--	--	NPH3 family	BTB/POZ domain-containing protein DOT3 OS=Arabidopsis thaliana OX=3702 GN=DOT3 PE=2 SV=1	S	Function unknown	BTB/POZ domain-containing protein DOT3 [Brassica rapa]
BraA06g001700.3C.gene	2258	1652	1048	538	668	724	70.6879	49.5323	30.5082	15.4129	18.7442	22.4234	7.06955e-06	-1.48932	down	--	--	Molecular Function: DNA binding (GO:0003677);; Cellular Component: nucleus (GO:0005634);; Biological Process: regulation of transcription, DNA-templated (GO:0006355);;	K00521|2.09e-49|cmos:111447866|K00521 ferric-chelate reductase [EC:1.16.1.7] | (RefSeq) ferric reduction oxidase 7, chloroplastic-like	--	--	--	No apical meristem (NAM) protein	NAC domain-containing protein 19 OS=Arabidopsis thaliana OX=3702 GN=NAC019 PE=1 SV=1	K	Transcription	NAC domain-containing protein 19 [Brassica rapa]
BraA07g025300.3C.gene	723	518	330	265	224	244	69.3888	47.6514	29.4393	23.2986	19.3003	23.1902	0.00108036	-1.23348	down	--	--	Molecular Function: electron transfer activity (GO:0009055);; Molecular Function: protein disulfide oxidoreductase activity (GO:0015035);;	K03676|1.88e-71|bna:106356880|K03676 glutaredoxin 3 | (RefSeq) glutaredoxin-C14-like	--	[O]	Posttranslational modification, protein turnover, chaperones	Glutaredoxin	Glutaredoxin-C14 OS=Arabidopsis thaliana OX=3702 GN=GRXC14 PE=3 SV=1	O	Posttranslational modification, protein turnover, chaperones	glutaredoxin-C14-like [Brassica napus]
BraA01g023600.3C.gene	5	0	13	89	37	60	0.098619	0	0.245303	1.6681	0.673148	1.21808	0.00121851	3.27827	up	--	--	Molecular Function: nucleic acid binding (GO:0003676);; Molecular Function: zinc ion binding (GO:0008270);;	K11253|1.60e-14|soe:110788621|K11253 histone H3 | (RefSeq) uncharacterized protein LOC110788621	--	--	--	SWIM zinc finger	--	--	--	hypothetical protein BRARA_H01069 [Brassica rapa]
BraA01g023290.3C.gene	41	60	129	262	246	226	1.35348	1.91021	4.0103	8.03957	7.38846	7.48046	0.000634432	1.57891	up	--	--	Molecular Function: transcription regulatory region sequence-specific DNA binding (GO:0000976);; Molecular Function: DNA-binding transcription factor activity (GO:0003700);; Molecular Function: transcription coregulator activity (GO:0003712);; Cellular Component: nucleus (GO:0005634);; Biological Process: regulation of transcription, DNA-templated (GO:0006355);; Molecular Function: sequence-speci…	K09422|1.36e-194|bna:106448040|K09422 transcription factor MYB, plant | (RefSeq) transcription factor MYB44-like	--	[K]	Transcription	Myb-like DNA-binding domain	Transcription factor MYB77 OS=Arabidopsis thaliana OX=3702 GN=MYB77 PE=1 SV=1	--	--	transcription factor MYB77 [Brassica rapa]
BraA05g005160.3C.gene	102	210	233	593	579	403	2.96475	5.84788	6.3041	15.8411	15.1535	11.6216	2.72754e-05	1.41813	up	[M]	Cell wall/membrane/envelope biogenesis	Molecular Function: catalytic activity (GO:0003824);;	K13265|8.02e-112|gmx:100793687|K13265 vestitone reductase [EC:1.1.1.348] | (RefSeq) uncharacterized protein LOC100793687	Isoflavonoid biosynthesis (ko00943)	[V]	Defense mechanisms	NAD dependent epimerase/dehydratase family	Protein BRI1-5 ENHANCED 1 OS=Arabidopsis thaliana OX=3702 GN=BEN1 PE=2 SV=1	V	Defense mechanisms	protein BRI1-5 ENHANCED 1 [Brassica rapa]
BraA03g043470.3C.gene	255	211	176	401	466	647	8.93342	7.07694	5.71149	12.8803	14.6699	22.4501	0.00128696	1.12759	up	--	--	Molecular Function: DNA binding (GO:0003677);; Cellular Component: nucleus (GO:0005634);; Biological Process: regulation of transcription, DNA-templated (GO:0006355);;	K00521|7.30e-53|cmos:111447866|K00521 ferric-chelate reductase [EC:1.16.1.7] | (RefSeq) ferric reduction oxidase 7, chloroplastic-like	--	--	--	No apical meristem (NAM) protein	NAC domain-containing protein 6 OS=Glycine max OX=3847 GN=NAC6 PE=2 SV=1	K	Transcription	NAC domain-containing protein 35-like [Brassica napus]
BraA07g029140.3C.gene	30	27	48	104	84	104	2.42719	2.13276	3.65846	7.90074	6.22568	8.49235	0.00555676	1.37295	up	--	--	Biological Process: response to auxin (GO:0009733);;	K07441|2.61e-07|sind:105162010|K07441 beta-1,4-N-acetylglucosaminyltransferase [EC:2.4.1.141] | (RefSeq) UDP-N-acetylglucosamine transferase subunit ALG14 homolog	N-Glycan biosynthesis (ko00510);; Various types of N-glycan biosynthesis (ko00513)	--	--	Auxin responsive protein	Auxin-responsive protein SAUR78 OS=Arabidopsis thaliana OX=3702 GN=SAUR78 PE=1 SV=1	S	Function unknown	auxin-responsive protein SAUR78 [Brassica rapa]
BraA10g022350.3C.gene	104	165	179	459	407	368	2.04765	3.12378	3.30642	8.34407	7.25289	7.22773	2.61955e-07	1.35052	up	--	--	Molecular Function: antiporter activity (GO:0015297);; Cellular Component: membrane (GO:0016020);; Cellular Component: integral component of membrane (GO:0016021);; Molecular Function: transmembrane transporter activity (GO:0022857);; Molecular Function: xenobiotic transmembrane transporter activity (GO:0042910);;	K03327|0.0|brp:103833197|K03327 multidrug resistance protein, MATE family | (RefSeq) protein DETOXIFICATION 25 isoform X1	--	[R]	General function prediction only	MatE	Protein DETOXIFICATION 25 OS=Arabidopsis thaliana OX=3702 GN=DTX25 PE=2 SV=1	V	Defense mechanisms	protein DETOXIFICATION 25 isoform X1 [Brassica rapa]
BraA03g046670.3C.gene	150	94	90	49	48	28	2.61713	1.56541	1.46655	0.772328	0.743058	0.469139	0.00185222	-1.5606	down	[TK]	Signal transduction mechanisms;; Transcription	Biological Process: phosphorelay signal transduction system (GO:0000160);; Molecular Function: DNA binding (GO:0003677);; Molecular Function: DNA-binding transcription factor activity (GO:0003700);; Cellular Component: nucleus (GO:0005634);;	K14491|1.73e-229|csat:104718774|K14491 two-component response regulator ARR-B family | (RefSeq) two-component response regulator ARR2-like	Plant hormone signal transduction (ko04075)	[K]	Transcription	Response regulator receiver domain	Two-component response regulator ARR2 OS=Arabidopsis thaliana OX=3702 GN=ARR2 PE=1 SV=1	K	Transcription	two-component response regulator ARR2 isoform X2 [Brassica rapa]
BraA05g000900.3C.gene	3924	2031	1927	1534	1166	1205	74.5168	36.9383	34.0265	26.6613	19.8616	22.6461	0.000870353	-1.15052	down	[QV]	Secondary metabolites biosynthesis, transport and catabolism;; Defense mechanisms	Molecular Function: monooxygenase activity (GO:0004497);; Molecular Function: iron ion binding (GO:0005506);; Molecular Function: oxidoreductase activity, acting on paired donors, with incorporation or reduction of molecular oxygen (GO:0016705);; Molecular Function: heme binding (GO:0020037);;	K20660|0.0|brp:103866415|K20660 cytochrome P450 family 709 | (RefSeq) cytochrome P450 709B2	--	[QI]	Secondary metabolites biosynthesis, transport and catabolism;; Lipid transport and metabolism	Cytochrome P450	Cytochrome P450 709B2 OS=Arabidopsis thaliana OX=3702 GN=CYP709B2 PE=2 SV=1	Q	Secondary metabolites biosynthesis, transport and catabolism	cytochrome P450 709B2 [Brassica rapa]
BraA08g004520.3C.gene	92	104	171	1660	377	1799	2.77557	3.01021	4.80152	46.1331	10.2538	54.0345	0.000280451	3.31139	up	--	--	--	K22849|3.34e-193|brp:103833019|K22849 diacylglycerol O-acyltransferase 3, plant [EC:2.3.1.20] | (RefSeq) diacylglycerol O-acyltransferase 3	Glycerolipid metabolism (ko00561)	--	--	--	Diacylglycerol O-acyltransferase 3 OS=Arabidopsis thaliana OX=3702 GN=DGAT3 PE=1 SV=2	--	--	diacylglycerol O-acyltransferase 3 [Brassica rapa]
BraA09g041490.3C.gene	1734	1296	737	580	727	722	105.266	75.3141	41.5945	32.2064	39.5989	43.3595	0.00759439	-1.02541	down	--	--	Molecular Function: DNA binding (GO:0003677);; Molecular Function: DNA-binding transcription factor activity (GO:0003700);; Cellular Component: nucleus (GO:0005634);;	K09286|7.93e-113|bna:106390866|K09286 EREBP-like factor | (RefSeq) ethylene-responsive transcription factor ERF011-like	--	--	--	AP2 domain	Ethylene-responsive transcription factor ERF011 OS=Arabidopsis thaliana OX=3702 GN=ERF011 PE=2 SV=1	K	Transcription	ethylene-responsive transcription factor ERF011 [Brassica rapa]
BraA01g018010.3C.gene	105	238	75	17	26	39	1.68627	3.67273	1.11259	0.237758	0.372045	0.610266	0.000145149	-2.45527	down	[HJ]	Coenzyme transport and metabolism;; Translation, ribosomal structure and biogenesis	Cellular Component: cytoplasm (GO:0005737);; Molecular Function: indole-3-acetic acid amido synthetase activity (GO:0010279);; Molecular Function: acid-amino acid ligase activity (GO:0016881);;	K14487|0.0|bna:106445777|K14487 auxin responsive GH3 gene family | (RefSeq) indole-3-acetic acid-amido synthetase GH3.5-like	Plant hormone signal transduction (ko04075)	--	--	GH3 auxin-responsive promoter	Indole-3-acetic acid-amido synthetase GH3.5 OS=Arabidopsis thaliana OX=3702 GN=GH3.5 PE=1 SV=1	S	Function unknown	indole-3-acetic acid-amido synthetase GH3.5 [Brassica rapa]
BraA06g008170.3C.gene	42	63	65	181	153	102	1.38084	1.97735	1.96345	5.44154	4.52233	3.31336	0.00354232	1.23599	up	--	--	Molecular Function: hydrolase activity, hydrolyzing O-glycosyl compounds (GO:0004553);; Cellular Component: cell wall (GO:0005618);; Biological Process: xyloglucan metabolic process (GO:0010411);; Molecular Function: xyloglucan:xyloglucosyl transferase activity (GO:0016762);; Biological Process: cell wall biogenesis (GO:0042546);; Cellular Component: apoplast (GO:0048046);; Biological Process: ce…	K08235|2.60e-238|bna:106385882|K08235 xyloglucan:xyloglucosyl transferase [EC:2.4.1.207] | (RefSeq) probable xyloglucan endotransglucosylase/hydrolase protein 8	--	--	--	Glycosyl hydrolases family 16	Probable xyloglucan endotransglucosylase/hydrolase protein 8 OS=Arabidopsis thaliana OX=3702 GN=XTH8 PE=2 SV=2	G	Carbohydrate transport and metabolism	probable xyloglucan endotransglucosylase/hydrolase protein 8 [Brassica rapa]
NewGene_1291	63	85	57	9	31	13	2.39677	3.11584	1.97598	0.285946	1.04554	0.458164	0.00248328	-2.08553	down	--	--	--	--	--	--	--	Peptidase inhibitor I9	--	S	Function unknown	subtilisin-like protease SBT3.16 [Brassica rapa]
BraA02g023500.3C.gene	357	235	142	92	102	102	6.54356	4.11743	2.41492	1.53152	1.66432	1.84502	0.00186537	-1.4459	down	[GEPR]	Carbohydrate transport and metabolism;; Amino acid transport and metabolism;; Inorganic ion transport and metabolism;; General function prediction only	Cellular Component: integral component of membrane (GO:0016021);; Molecular Function: transmembrane transporter activity (GO:0022857);;	K08176|0.0|bna:106397575|K08176 MFS transporter, PHS family, inorganic phosphate transporter | (RefSeq) probable inorganic phosphate transporter 1-9	--	[P]	Inorganic ion transport and metabolism	Sugar (and other) transporter	Probable inorganic phosphate transporter 1-9 OS=Arabidopsis thaliana OX=3702 GN=PHT1-9 PE=2 SV=1	P	Inorganic ion transport and metabolism	probable inorganic phosphate transporter 1-9 [Brassica rapa]
BraA01g033090.3C.gene	689	164	48	28	22	12	61.9558	14.1043	3.96873	2.28862	1.76663	0.990529	0.00534945	-4.04893	down	--	--	--	--	--	--	--	--	--	S	Function unknown	hypothetical protein BRARA_A02827 [Brassica rapa]
BraA05g013840.3C.gene	596	431	300	264	192	191	57.1887	39.5765	26.755	23.2048	16.5389	18.1476	0.00174724	-1.17312	down	--	--	Molecular Function: electron transfer activity (GO:0009055);; Molecular Function: protein disulfide oxidoreductase activity (GO:0015035);;	K03676|7.66e-71|bna:106454885|K03676 glutaredoxin 3 | (RefSeq) monothiol glutaredoxin-S9	--	[O]	Posttranslational modification, protein turnover, chaperones	Glutaredoxin	Monothiol glutaredoxin-S9 OS=Arabidopsis thaliana OX=3702 GN=GRXS9 PE=1 SV=1	O	Posttranslational modification, protein turnover, chaperones	monothiol glutaredoxin-S9 [Brassica rapa]
BraA05g038010.3C.gene	4462	3199	2538	1433	1720	1602	62.9778	43.2421	33.3102	18.511	21.7839	22.3748	2.30315e-06	-1.23102	down	[HT]	Coenzyme transport and metabolism;; Signal transduction mechanisms	Molecular Function: protein kinase activity (GO:0004672);; Cellular Component: integral component of membrane (GO:0016021);; Biological Process: membrane lipid biosynthetic process (GO:0046467);; Biological Process: iron ion homeostasis (GO:0055072);; Biological Process: regulation of response to reactive oxygen species (GO:1901031);;	K13457|0.0|vvi:100252764|K13457 disease resistance protein RPM1 | (RefSeq) uncharacterized protein sll1770	Plant-pathogen interaction (ko04626)	[R]	General function prediction only	ABC1 family	Protein ACTIVITY OF BC1 COMPLEX KINASE 7, chloroplastic OS=Arabidopsis thaliana OX=3702 GN=ABC1K7 PE=1 SV=1	S	Function unknown	protein ACTIVITY OF BC1 COMPLEX KINASE 7, chloroplastic [Brassica rapa]
BraA03g043640.3C.gene	166	239	202	382	542	812	4.19054	5.77904	4.73968	8.83798	12.2958	20.3317	0.000156945	1.4238	up	--	--	--	--	--	--	--	LysM domain	--	S	Function unknown	uncharacterized protein LOC103860523 [Brassica rapa]
BraA03g044310.3C.gene	127	115	105	328	237	213	19.6047	17.0283	14.9588	46.3339	32.81	32.5132	0.0013693	1.03714	up	--	--	Cellular Component: mitochondrial respirasome (GO:0005746);; Cellular Component: integral component of membrane (GO:0016021);;	--	--	--	--	--	Probable cytochrome c oxidase subunit 5C-1 OS=Arabidopsis thaliana OX=3702 GN=At2g47380 PE=1 SV=1	--	--	probable cytochrome c oxidase subunit 5C-1 [Brassica rapa]
BraA10g019670.3C.gene	1426	978	691	392	439	366	10.3313	6.7892	4.65892	2.60121	2.85222	2.62363	1.2354e-06	-1.50871	down	[F]	Nucleotide transport and metabolism	Molecular Function: iron ion binding (GO:0005506);; Molecular Function: electron transfer activity (GO:0009055);; Molecular Function: 2 iron, 2 sulfur cluster binding (GO:0051537);; Molecular Function: FAD binding (GO:0071949);;	K11817|0.0|brp:103845621|K11817 indole-3-acetaldehyde oxidase [EC:1.2.3.7] | (RefSeq) indole-3-acetaldehyde oxidase isoform X2	Tryptophan metabolism (ko00380)	[F]	Nucleotide transport and metabolism	Molybdopterin-binding domain of aldehyde dehydrogenase	Indole-3-acetaldehyde oxidase OS=Arabidopsis thaliana OX=3702 GN=AAO1 PE=1 SV=2	F	Nucleotide transport and metabolism	indole-3-acetaldehyde oxidase isoform X2 [Brassica rapa]
BraA08g016130.3C.gene	127	208	128	17	74	41	5.17538	8.12685	4.84257	0.633952	2.71015	1.63128	0.00149287	-1.93549	down	--	--	--	K12486|2.95e-07|sind:105169704|K12486 stromal membrane-associated protein | (RefSeq) probable ADP-ribosylation factor GTPase-activating protein AGD11 isoform X1	Endocytosis (ko04144)	[R]	General function prediction only	C2 domain	Probable ADP-ribosylation factor GTPase-activating protein AGD11 OS=Arabidopsis thaliana OX=3702 GN=AGD11 PE=2 SV=1	S	Function unknown	elicitor-responsive protein 3 [Brassica rapa]
BraA06g017730.3C.gene	2	14	8	203	77	204	0.039661	0.359	0.211737	5.30998	1.97338	5.76608	2.63737e-10	4.24504	up	[O]	Posttranslational modification, protein turnover, chaperones	Molecular Function: cysteine-type endopeptidase activity (GO:0004197);; Cellular Component: extracellular space (GO:0005615);; Cellular Component: lysosome (GO:0005764);; Biological Process: proteolysis involved in cellular protein catabolic process (GO:0051603);;	K16292|3.43e-116|jre:108997808|K16292 KDEL-tailed cysteine endopeptidase [EC:3.4.22.-] | (RefSeq) senescence-specific cysteine protease SAG39-like	--	[O]	Posttranslational modification, protein turnover, chaperones	Papain family cysteine protease	Senescence-specific cysteine protease SAG12 OS=Arabidopsis thaliana OX=3702 GN=SAG12 PE=1 SV=1	O	Posttranslational modification, protein turnover, chaperones	zingipain-2-like [Brassica rapa]
BraA10g004850.3C.gene	56	45	64	132	121	123	0.84667	0.650624	0.897844	1.82442	1.63674	1.8398	0.00637045	1.07427	up	--	--	Molecular Function: ATP binding (GO:0005524);; Molecular Function: phosphatidylinositol phosphate kinase activity (GO:0016307);;	K00889|6.81e-313|bna:106371146|K00889 1-phosphatidylinositol-4-phosphate 5-kinase [EC:2.7.1.68] | (RefSeq) putative 1-phosphatidylinositol-3-phosphate 5-kinase FAB1D	Inositol phosphate metabolism (ko00562);; Phosphatidylinositol signaling system (ko04070);; Endocytosis (ko04144)	[T]	Signal transduction mechanisms	Phosphatidylinositol-4-phosphate 5-Kinase	Putative 1-phosphatidylinositol-3-phosphate 5-kinase FAB1D OS=Arabidopsis thaliana OX=3702 GN=FAB1D PE=3 SV=1	T	Signal transduction mechanisms	uncharacterized protein LOC117129160 [Brassica rapa]
BraA06g015290.3C.gene	102	204	83	349	353	382	2.635	5.05746	1.98545	8.2579	8.19913	9.7698	0.00130771	1.36098	up	--	--	Molecular Function: purine nucleoside transmembrane transporter activity (GO:0015211);; Cellular Component: integral component of membrane (GO:0016021);;	K07893|3.56e-11|ini:109192111|K07893 Ras-related protein Rab-6A | (RefSeq) ras-related protein RABH1b-like	--	--	--	Purine nucleobase transmembrane transport	Purine permease 14 OS=Arabidopsis thaliana OX=3702 GN=PUP14 PE=1 SV=1	--	--	purine permease 14 [Brassica rapa]
BraA07g011370.3C.gene	67	99	119	250	223	153	1.4022	2.00403	2.32962	4.83226	4.2307	3.19437	0.00759439	1.01693	up	--	--	--	K01805|1.87e-12|ini:109191713|K01805 xylose isomerase [EC:5.3.1.5] | (RefSeq) xylose isomerase	Pentose and glucuronate interconversions (ko00040);; Fructose and mannose metabolism (ko00051)	--	--	Putative serine esterase (DUF676)	Pollen-specific protein-like At4g18596 OS=Arabidopsis thaliana OX=3702 GN=At4g18596 PE=2 SV=1	S	Function unknown	putative lipase ROG1 isoform X2 [Brassica rapa]
BraA05g041520.3C.gene	180	194	83	32	48	46	9.20307	9.5148	3.95464	1.482	2.17909	2.32315	0.000116608	-1.98789	down	[R]	General function prediction only	Cellular Component: cytosol (GO:0005829);; Molecular Function: gamma-glutamylaminecyclotransferase activity (GO:0061929);;	K19761|8.23e-141|brp:103870881|K19761 gamma-glutamylaminecyclotransferase [EC:2.3.2.-] | (RefSeq) putative gamma-glutamylcyclotransferase At3g02910	--	[S]	Function unknown	Gamma-glutamyl cyclotransferase, AIG2-like	Putative gamma-glutamylcyclotransferase At3g02910 OS=Arabidopsis thaliana OX=3702 GN=At3g02910 PE=2 SV=2	S	Function unknown	putative gamma-glutamylcyclotransferase At3g02910 [Brassica rapa]
BraA08g018920.3C.gene	122	88	130	303	195	315	2.857	1.96628	2.83444	6.52063	4.10163	7.3252	0.00255508	1.15311	up	--	--	Molecular Function: molecular_function (GO:0003674);; Molecular Function: GTPase activator activity (GO:0005096);; Molecular Function: binding (GO:0005488);; Molecular Function: protein binding (GO:0005515);; Cellular Component: cellular_component (GO:0005575);; Cellular Component: extracellular region (GO:0005576);; Cellular Component: intracellular (GO:0005622);; Cellular Component: obsolete ce…	K20168|2.85e-39|thj:104826549|K20168 TBC1 domain family member 15 | (RefSeq) TBC1 domain family member 15	--	[T]	Signal transduction mechanisms	Rab-GTPase-TBC domain	Rab GTPase-activating protein 22 OS=Arabidopsis thaliana OX=3702 GN=RABGAP22 PE=1 SV=1	T	Signal transduction mechanisms	TBC1 domain family member 15 isoform X1 [Brassica rapa]
BraA01g029590.3C.gene	64	171	268	666	584	315	1.60034	4.12091	6.27457	15.345	13.1777	7.84665	0.00331967	1.52864	up	--	--	Cellular Component: Golgi apparatus (GO:0005794);; Molecular Function: phosphoglycerate transmembrane transporter activity (GO:0015120);; Molecular Function: antiporter activity (GO:0015297);; Cellular Component: integral component of membrane (GO:0016021);; Molecular Function: transmembrane transporter activity (GO:0022857);; Molecular Function: triose-phosphate transmembrane transporter activit…	K15283|1.18e-273|brp:103831151|K15283 solute carrier family 35, member E1 | (RefSeq) glucose-6-phosphate/phosphate translocator 2, chloroplastic	--	[GE]	Carbohydrate transport and metabolism;; Amino acid transport and metabolism	Triose-phosphate Transporter family	Glucose-6-phosphate/phosphate translocator 2, chloroplastic OS=Arabidopsis thaliana OX=3702 GN=GPT2 PE=2 SV=2	--	--	unnamed protein product [Brassica rapa]
BraA01g021450.3C.gene	146	423	419	1573	1234	1585	4.91756	13.7064	13.2039	48.8015	37.4978	53.1527	6.49128e-09	2.06038	up	--	--	--	--	--	--	--	Hydrophobic seed protein	36.4 kDa proline-rich protein OS=Solanum lycopersicum OX=4081 GN=TPRP-F1 PE=2 SV=1	S	Function unknown	BnaA01g18740D [Brassica napus]
BraA03g042730.3C.gene	153	89	134	311	313	299	7.03785	3.92608	5.75457	13.149	12.9462	13.6571	0.000195705	1.17532	up	--	--	--	--	--	--	--	Peptidase of plants and bacteria	Basic secretory protease (Fragments) OS=Boswellia serrata OX=613112 PE=1 SV=1	S	Function unknown	uncharacterized protein LOC103860417 [Brassica rapa]
BraA07g014720.3C.gene	328	247	130	90	61	73	6.63398	4.7692	2.44452	1.66329	1.10651	1.44545	0.000151254	-1.79032	down	--	--	Molecular Function: UDP-glycosyltransferase activity (GO:0008194);; Cellular Component: intracellular membrane-bounded organelle (GO:0043231);; Molecular Function: quercetin 3-O-glucosyltransferase activity (GO:0080043);; Molecular Function: quercetin 7-O-glucosyltransferase activity (GO:0080044);;	K23452|0.0|brp:103829334|K23452 UDP-glucosyltransferase 85A [EC:2.4.1.-] | (RefSeq) UDP-glycosyltransferase 85A1	Zeatin biosynthesis (ko00908)	[GC]	Carbohydrate transport and metabolism;; Energy production and conversion	UDP-glucoronosyl and UDP-glucosyl transferase	UDP-glycosyltransferase 85A1 OS=Arabidopsis thaliana OX=3702 GN=UGT85A1 PE=2 SV=1	--	--	UDP-glycosyltransferase 85A1 [Brassica rapa]
BraA08g024210.3C.gene	406	542	349	192	209	228	8.73169	11.1563	6.98011	3.7624	4.0206	4.84404	6.6678e-05	-1.16033	down	--	--	Cellular Component: nucleus (GO:0005634);; Molecular Function: sequence-specific DNA binding (GO:0043565);; Biological Process: positive regulation of transcription, DNA-templated (GO:0045893);; Biological Process: positive regulation of long-day photoperiodism, flowering (GO:0048578);;	--	--	--	--	--	Transcription factor VOZ1 OS=Arabidopsis thaliana OX=3702 GN=VOZ1 PE=1 SV=1	K	Transcription	transcription factor VOZ1 isoform X1 [Brassica rapa]
BraA02g027270.3C.gene	3123	4099	2027	1567	1870	1565	235.886	296.509	142.367	108.335	126.74	116.955	0.000616333	-1.01647	down	--	--	--	--	--	--	--	Dormancy/auxin associated protein	Dormancy-associated protein homolog 3 OS=Arabidopsis thaliana OX=3702 GN=At1g56220 PE=1 SV=1	--	--	hypothetical protein F2Q69_00021488 [Brassica cretica]
BraA02g044660.3C.gene	11	36	41	121	88	92	0.134743	0.433265	0.482513	1.39921	0.996626	1.15449	0.0068728	1.67439	up	[G]	Carbohydrate transport and metabolism	Molecular Function: hydrolase activity, hydrolyzing O-glycosyl compounds (GO:0004553);; Molecular Function: xylan 1,4-beta-xylosidase activity (GO:0009044);; Cellular Component: plant-type cell wall (GO:0009505);; Biological Process: arabinan catabolic process (GO:0031222);; Biological Process: xylan catabolic process (GO:0045493);; Molecular Function: alpha-L-arabinofuranosidase activity (GO:004…	K15920|0.0|brp:103855248|K15920 xylan 1,4-beta-xylosidase [EC:3.2.1.37] | (RefSeq) beta-D-xylosidase 4	Amino sugar and nucleotide sugar metabolism (ko00520)	--	--	Glycosyl hydrolase family 3 C-terminal domain	Beta-D-xylosidase 4 OS=Arabidopsis thaliana OX=3702 GN=BXL4 PE=1 SV=1	G	Carbohydrate transport and metabolism	beta-D-xylosidase 4 [Brassica rapa]
BraA01g017030.3C.gene	168	228	95	70	69	58	10.9205	14.205	5.69223	4.15291	3.98464	3.7275	0.00262832	-1.45061	down	--	--	--	--	--	[K]	Transcription	--	--	S	Function unknown	uncharacterized protein LOC103866046 [Brassica rapa]
BraA10g010550.3C.gene	11	9	20	73	153	156	0.446573	0.344575	0.757691	2.74516	5.67927	6.40464	2.41979e-08	3.15985	up	--	--	Molecular Function: DNA binding (GO:0003677);; Molecular Function: DNA-binding transcription factor activity (GO:0003700);; Cellular Component: nucleus (GO:0005634);;	K09286|2.00e-36|cit:102614162|K09286 EREBP-like factor | (RefSeq) dehydration-responsive element-binding protein 1B-like	--	--	--	AP2 domain	Ethylene-responsive transcription factor ERF025 OS=Arabidopsis thaliana OX=3702 GN=ERF025 PE=2 SV=1	K	Transcription	ethylene-responsive transcription factor ERF025 [Brassica rapa]
BraA09g057440.3C.gene	108	102	58	37	25	38	2.69048	2.41584	1.32638	0.833887	0.544066	0.933209	0.00686717	-1.54483	down	[C]	Energy production and conversion	Molecular Function: FMN binding (GO:0010181);; Molecular Function: oxidoreductase activity (GO:0016491);;	K05894|2.95e-275|brp:103842724|K05894 12-oxophytodienoic acid reductase [EC:1.3.1.42] | (RefSeq) putative 12-oxophytodienoate reductase-like protein 2A isoform X1	alpha-Linolenic acid metabolism (ko00592)	[CR]	Energy production and conversion;; General function prediction only	NADH:flavin oxidoreductase / NADH oxidase family	12-oxophytodienoate reductase 2 OS=Arabidopsis thaliana OX=3702 GN=OPR2 PE=1 SV=2	C	Energy production and conversion	putative 12-oxophytodienoate reductase-like protein 2A isoform X3 [Brassica rapa]
BraA07g012290.3C.gene	96	63	44	10	16	19	4.72926	2.99237	2.00538	0.423408	0.679676	0.931358	0.000699176	-2.2989	down	--	--	--	--	--	--	--	--	--	--	--	uncharacterized protein LOC103829075 [Brassica rapa]
BraA09g018550.3C.gene	1232	1593	1204	3039	3300	2608	23.2606	28.7937	21.1304	52.5356	55.9069	48.7203	1.06523e-09	1.0267	up	--	--	--	--	--	--	--	--	--	S	Function unknown	DNA ligase 1 [Brassica rapa]
BraA02g020420.3C.gene	13	44	50	521	261	633	0.263358	0.844932	0.936559	9.73015	4.76434	12.7717	2.88979e-14	3.64981	up	[G]	Carbohydrate transport and metabolism	Molecular Function: cellulase activity (GO:0008810);; Biological Process: cellulose catabolic process (GO:0030245);;	K01179|0.0|bna:106395957|K01179 endoglucanase [EC:3.2.1.4] | (RefSeq) endoglucanase 9-like	Starch and sucrose metabolism (ko00500)	--	--	Glycosyl hydrolase family 9	Endoglucanase 9 OS=Arabidopsis thaliana OX=3702 GN=CEL3 PE=1 SV=1	G	Carbohydrate transport and metabolism	hypothetical protein BRARA_B01966 [Brassica rapa]
BraA04g031130.3C.gene	21	15	39	72	76	106	2.31429	1.58662	3.99712	7.23716	7.55705	11.6527	0.00703858	1.6701	up	--	--	Molecular Function: hydrolase activity, hydrolyzing O-glycosyl compounds (GO:0004553);; Biological Process: carbohydrate metabolic process (GO:0005975);;	K01188|2.88e-56|bna:106429289|K01188 beta-glucosidase [EC:3.2.1.21] | (RefSeq) beta-glucosidase 15 isoform X1	Cyanoamino acid metabolism (ko00460);; Starch and sucrose metabolism (ko00500);; Phenylpropanoid biosynthesis (ko00940)	[G]	Carbohydrate transport and metabolism	Glycosyl hydrolase family 1	Beta-glucosidase 15 OS=Arabidopsis thaliana OX=3702 GN=BGLU15 PE=1 SV=1	G	Carbohydrate transport and metabolism	hypothetical protein F2Q70_00024604, partial [Brassica cretica]
BraA01g008320.3C.gene	223	479	445	1127	963	543	5.18542	10.6767	9.63244	24.0209	20.1132	12.4993	0.00514378	1.07566	up	--	--	--	--	--	--	--	Protein of unknown function (DUF1005)	--	S	Function unknown	uncharacterized protein LOC103853708 [Brassica rapa]
NewGene_886	391	549	286	131	151	183	7.07051	9.51788	4.8068	2.17109	2.45227	3.27589	2.49619e-05	-1.51362	down	[QV]	Secondary metabolites biosynthesis, transport and catabolism;; Defense mechanisms	Molecular Function: iron ion binding (GO:0005506);; Cellular Component: membrane (GO:0016020);; Molecular Function: oxidoreductase activity, acting on paired donors, with incorporation or reduction of molecular oxygen, NAD(P)H as one donor, and incorporation of one atom of oxygen (GO:0016709);; Molecular Function: heme binding (GO:0020037);;	K20559|1.68e-217|crb:17884730|K20559 dihydrocamalexate/camalexin synthase [EC:1.14.19.52] | (RefSeq) bifunctional dihydrocamalexate synthase/camalexin synthase	MAPK signaling pathway - plant (ko04016)	[Q]	Secondary metabolites biosynthesis, transport and catabolism	Cytochrome P450	Cytochrome P450 71B7 OS=Arabidopsis thaliana OX=3702 GN=CYP71B7 PE=1 SV=1	Q	Secondary metabolites biosynthesis, transport and catabolism	cytochrome P450 71B7 [Brassica rapa]
BraA04g002400.3C.gene	957	835	545	385	399	451	23.1948	19.3939	12.273	8.53744	8.66651	10.8025	0.000906395	-1.04449	down	[M]	Cell wall/membrane/envelope biogenesis	Molecular Function: transmembrane receptor protein serine/threonine kinase activity (GO:0004675);; Molecular Function: protein tyrosine kinase activity (GO:0004713);; Molecular Function: ATP binding (GO:0005524);; Cellular Component: plasma membrane (GO:0005886);; Biological Process: protein phosphorylation (GO:0006468);;	K13436|2.14e-303|brp:103862948|K13436 pto-interacting protein 1 [EC:2.7.11.1] | (RefSeq) PTI1-like tyrosine-protein kinase 3 isoform X1	Plant-pathogen interaction (ko04626)	[T]	Signal transduction mechanisms	Protein tyrosine and serine/threonine kinase	PTI1-like tyrosine-protein kinase 3 OS=Arabidopsis thaliana OX=3702 GN=PTI13 PE=1 SV=1	T	Signal transduction mechanisms	PTI1-like tyrosine-protein kinase 3 isoform X1 [Brassica rapa]
BraA07g037600.3C.gene	65	98	61	184	246	237	3.63424	5.25882	3.17798	9.51941	12.4369	13.2294	6.16397e-05	1.45875	up	[V]	Defense mechanisms	Molecular Function: hydrolase activity (GO:0016787);;	K07766|6.66e-129|bna:106354287|K07766 diphosphoinositol-polyphosphate diphosphatase [EC:3.6.1.52] | (RefSeq) nudix hydrolase 21, chloroplastic	--	[T]	Signal transduction mechanisms	NUDIX domain	Nudix hydrolase 21, chloroplastic OS=Arabidopsis thaliana OX=3702 GN=NUDT21 PE=2 SV=1	T	Signal transduction mechanisms	nudix hydrolase 21, chloroplastic [Brassica rapa]
BraA06g031540.3C.gene	2287	1465	1103	873	913	671	43.5956	26.7347	19.5456	15.2333	15.6168	12.6427	0.000619329	-1.12633	down	[HC]	Coenzyme transport and metabolism;; Energy production and conversion	Molecular Function: squalene monooxygenase activity (GO:0004506);; Cellular Component: integral component of membrane (GO:0016021);; Biological Process: sterol biosynthetic process (GO:0016126);; Molecular Function: flavin adenine dinucleotide binding (GO:0050660);;	K00511|0.0|brp:103874288|K00511 squalene monooxygenase [EC:1.14.14.17] | (RefSeq) squalene monooxygenase 1,2 isoform X1	Steroid biosynthesis (ko00100);; Sesquiterpenoid and triterpenoid biosynthesis (ko00909)	[I]	Lipid transport and metabolism	Squalene epoxidase	Squalene monooxygenase 1,2 OS=Brassica napus OX=3708 GN=SQP1,2 PE=2 SV=1	I	Lipid transport and metabolism	squalene monooxygenase 1,2 isoform X1 [Brassica rapa]
BraA02g031780.3C.gene	29	52	61	134	124	228	0.595169	1.03062	1.1882	2.57323	2.32108	4.73354	0.000949831	1.6935	up	[QV]	Secondary metabolites biosynthesis, transport and catabolism;; Defense mechanisms	Molecular Function: monooxygenase activity (GO:0004497);; Molecular Function: iron ion binding (GO:0005506);; Molecular Function: oxidoreductase activity, acting on paired donors, with incorporation or reduction of molecular oxygen (GO:0016705);; Molecular Function: heme binding (GO:0020037);;	K09843|0.0|bna:106361235|K09843 (+)-abscisic acid 8'-hydroxylase [EC:1.14.14.137] | (RefSeq) abscisic acid 8'-hydroxylase 3-like	Carotenoid biosynthesis (ko00906)	[QI]	Secondary metabolites biosynthesis, transport and catabolism;; Lipid transport and metabolism	Cytochrome P450	Abscisic acid 8'-hydroxylase 3 OS=Arabidopsis thaliana OX=3702 GN=CYP707A3 PE=1 SV=1	Q	Secondary metabolites biosynthesis, transport and catabolism	abscisic acid 8'-hydroxylase 3-like [Brassica rapa]
BraA03g046070.3C.gene	4	2	6	45	37	105	0.089462	0.037909	0.12119	1.00073	0.790765	2.53429	1.66856e-05	3.88863	up	[L]	Replication, recombination and repair	Molecular Function: ubiquitin-protein transferase activity (GO:0004842);;	--	--	--	--	U-box domain	E3 ubiquitin-protein ligase PUB22 OS=Arabidopsis thaliana OX=3702 GN=PUB22 PE=1 SV=1	H	Coenzyme transport and metabolism	E3 ubiquitin-protein ligase PUB22 [Brassica rapa]
BraA01g007920.3C.gene	306	735	506	1171	1138	1060	5.80978	13.3569	8.93738	20.3572	19.3908	19.9102	0.00227329	1.01191	up	--	--	--	--	--	[L]	Replication, recombination and repair	DDE superfamily endonuclease	--	L	Replication, recombination and repair	protein ALP1-like [Brassica rapa]
BraA01g031220.3C.gene	109	97	163	325	296	186	6.84535	5.84726	9.54249	18.7404	16.6971	11.5419	0.00648683	1.00679	up	[T]	Signal transduction mechanisms	Molecular Function: calcium ion binding (GO:0005509);; Biological Process: calcium-mediated signaling (GO:0019722);;	K13448|5.52e-79|brp:103834226|K13448 calcium-binding protein CML | (RefSeq) calmodulin-like protein 8	Plant-pathogen interaction (ko04626)	[T]	Signal transduction mechanisms	EF hand	Calmodulin-like protein 11 OS=Arabidopsis thaliana OX=3702 GN=CML11 PE=2 SV=1	T	Signal transduction mechanisms	hypothetical protein BRARA_A02692 [Brassica rapa]
BraA03g036610.3C.gene	864	633	436	253	385	289	10.1393	7.11419	4.75257	2.70958	4.04621	3.35393	0.000874053	-1.19738	down	--	--	Cellular Component: plasma membrane (GO:0005886);; Biological Process: anion transport (GO:0006820);; Molecular Function: mechanosensitive ion channel activity (GO:0008381);; Cellular Component: integral component of membrane (GO:0016021);;	K22048|0.0|brp:103859590|K22048 mechanosensitive ion channel protein 4/5/6/7/8/9/10 | (RefSeq) mechanosensitive ion channel protein 5	--	[M]	Cell wall/membrane/envelope biogenesis	Mechanosensitive ion channel	Mechanosensitive ion channel protein 5 OS=Arabidopsis thaliana OX=3702 GN=MSL5 PE=2 SV=1	M	Cell wall/membrane/envelope biogenesis	mechanosensitive ion channel protein 5 [Brassica rapa]
NewGene_2322	297	229	154	125	98	123	9.2459	6.87154	4.4324	3.53849	2.71458	3.80707	0.00986621	-1.10185	down
BraA05g011130.3C.gene	285	273	56	24	49	26	17.3691	15.9181	3.12886	1.32231	2.65773	1.56672	4.07687e-05	-2.78943	down
NewGene_3298	395	484	242	152	215	122	6.57797	7.7263	3.5579	2.30515	3.14551	1.80604	0.000619061	-1.33764	down
NewGene_59	495	407	161	109	155	112	6.41771	4.95461	2.37858	1.54182	1.66185	1.2786	0.000841248	-1.64526	down
NewGene_1388	42	29	60	208	236	126	2.32154	1.5557	3.10645	10.755	11.9272	7.03197	1.79852e-06	1.99564	up
